# Supplementary material for: Design, Synthesis, and Biological Evaluation of Novel Hydroxamic Acid-Based Organoselenium Hybrids
Source: MDPI journal article supplement (doi:10.3390/ph16030367), 2023-02-28
Supplement: s1 [file s1]

# Design, synthesis, and biological evaluation of novel hydroxamic acid-based organoselenium hybrids

Jameelah S. Alotaibi<sup>1</sup>, Yasair S. Al-Faiyz<sup>1</sup>, Saad Shaaban<sup>1,2\*</sup>

<sup>1</sup>Chemistry Department, College of Science, King Faisal University, Al-Ahsa 31982, Saudi Arabia.

<sup>2</sup>Chemistry Department, Faculty of Science, Mansoura University, Mansoura, Egypt.

\* Correspondence: sbrahim@kfu.edu.sa; dr\_saad\_chem@mans.edu.sa

| SUPPORTING INFORMATION                                          | PAGE |
|-----------------------------------------------------------------|------|
| The biological assays                                           | S2   |
| Copies of <sup>1</sup> H & <sup>13</sup> CNMR spectra IR and MS | S6   |

## **1.1. The biological assays**

### **1.1.1. The anticancer activity**

The breast adenocarcinoma (MCF-7), Hepatocellular carcinoma (HEPG-2), and normal fibroblast (WI-38) cells were obtained from ATCC via Holding company for biological products and vaccines (VACSERA), Cairo, Egypt. The reagents RPMI-540 medium, MTT, DMSO, and fetal bovine serum was obtained from Sigma Aldrich. Dulbecco's modified Eagle's medium was used as the culture medium for the cells, and the cytotoxicity was evaluated using the reported MTT assay. Doxorubicin was used as the positive reference, and the IC<sub>50</sub> values were obtained from the corresponding dose-response curve.

#### **MTT assay[1-3]**

This colorimetric assay is based on converting the yellow tetrazolium bromide (MTT) to a purple formazan derivative by mitochondrial succinate dehydrogenase in viable cells. Cell lines were cultured in RPMI-540 medium with 10% fetal bovine serum. Antibiotics added were 100 units/ml penicillin and 100µg/ml streptomycin at 37 C in a 5% Co<sub>2</sub> incubator. The cell lines were seeded in a 96-well plate at a density of  $1.0 \times 10^4$  cells/well. at 37 C for 48 h under 5% Co<sub>2</sub>. After incubation, the cells were treated with different concentrations of compounds and incubated for 13 h. After 13 h of drug treatment, 9 µl of MTT solution at 5mg/ml was added and incubated for 4 h. Finally, dimethyl sulfoxide (DMSO) in the volume of 100 µl is added to each well to dissolve the purple formazan formed. The colorimetric assay is measured and recorded at an absorbance of 570 nm using a plate reader (EXL 800, USA). The percentage of the relative cell viability was calculated as (A<sub>570</sub> of treated samples/A<sub>570</sub> of the untreated sample) X 100.

### **1.1.2. The antimicrobial activity**

The antimicrobial activities of the OSe compounds were evaluated against *C. albicans* yeast as well as *E. coli* gram-negative and *S. aureus* gram-positive bacteria employing the agar well diffusion assay [4].

Briefly, a concentration of 1 mM was prepared for each compound by dissolving in DMSO. Paper discs of standard size (5cm) were sterilized in an autoclave and soaked in 9  $\mu$ L of the test compounds, and placed in the Petri dishes, which in turn contain a nutrient media (agar 9 g, peptone 5 g, and beef extract 3 g) seeded with the dedicated strain. Incubation lasted for 13 h at 36  $^{\circ}$ C. Experiments were replicated three times and the antifungal clotrimazole and antibiotic ampicillin were used as standards. The % activity index for the complex was determined and depicted in table 2.

Furthermore, the MICs (in  $\mu$ M) were determined by the microdilution method according to the reported protocol.

### **1.1.3. The antioxidant activity**

#### **1.1.3.1. The DPPH bioassay**

The hydrogen atom or electron donation ability of the corresponding compounds was measured by estimating the bleaching of the purple color of a methanolic solution of DPPH [5]. This spectrophotometric assay uses stable DPPH $\cdot$  reagent. The sample was prepared by adding 90 mL of the OSe compounds (1 mM in methanol) to 400 mL DPPH in methanol. After 30 min of incubation in the dark, the absorbance was read against a blank at 560 nm. Ascorbic acid (vitamin C) and ebselen were used as standard antioxidants (positive control). A blank sample was run without DPPH. A negative control sample was run using methanol instead of the sample. The radical scavenging activity was calculated

using the following equation:

$$\text{Inhibition\%} = (A_{\text{blank}} - A_{\text{sample}}) / (A_{\text{blank}}) * 100.$$

#### **1.1.3.2. The ABTS bioassay**

The antioxidant activity of the investigated compounds was assessed using 2,2'-azino-bis(3-ethylbenzothiazoline-6-sulphonic acid (ABTS) method [6]. The radical cation derived from ABTS was

prepared by the reaction of 60 mM ABTS solution with 0.3 M manganese dioxide solution in 0.1M phosphate buffer, pH 7. Then, the mixture was shaken, centrifuged, filtered, and the absorbance ( $A_{\text{control}}$ ) of the resulting green-blue solution (ABTS radical solution) was measured at wavelength 734 nm. Then, 50 mL of 1 mg/ml test compound in phosphate-buffered methanol was added. The absorbance ( $A_{\text{test}}$ ) was measured. The reduction in color intensity was expressed as % inhibition. The % inhibition for each compound is calculated from the following equation

$$\text{Inhibition\%} = (A_{\text{control}} - A_{\text{sample}}) / (A_{\text{control}}) * 100$$

Ascorbic acid (vitamin C) was used as a standard antioxidant (positive control). A blank sample was run without ABTS and using MeOH/phosphate buffer (1:1) instead of the sample. A negative control sample was run with MeOH/phosphate buffer (1:1) instead of a tested compound.



*Synthesis of methyl (Z)-4-oxo-4-((4-selenocyanatophenyl)amino)but-2-enoate (4)*

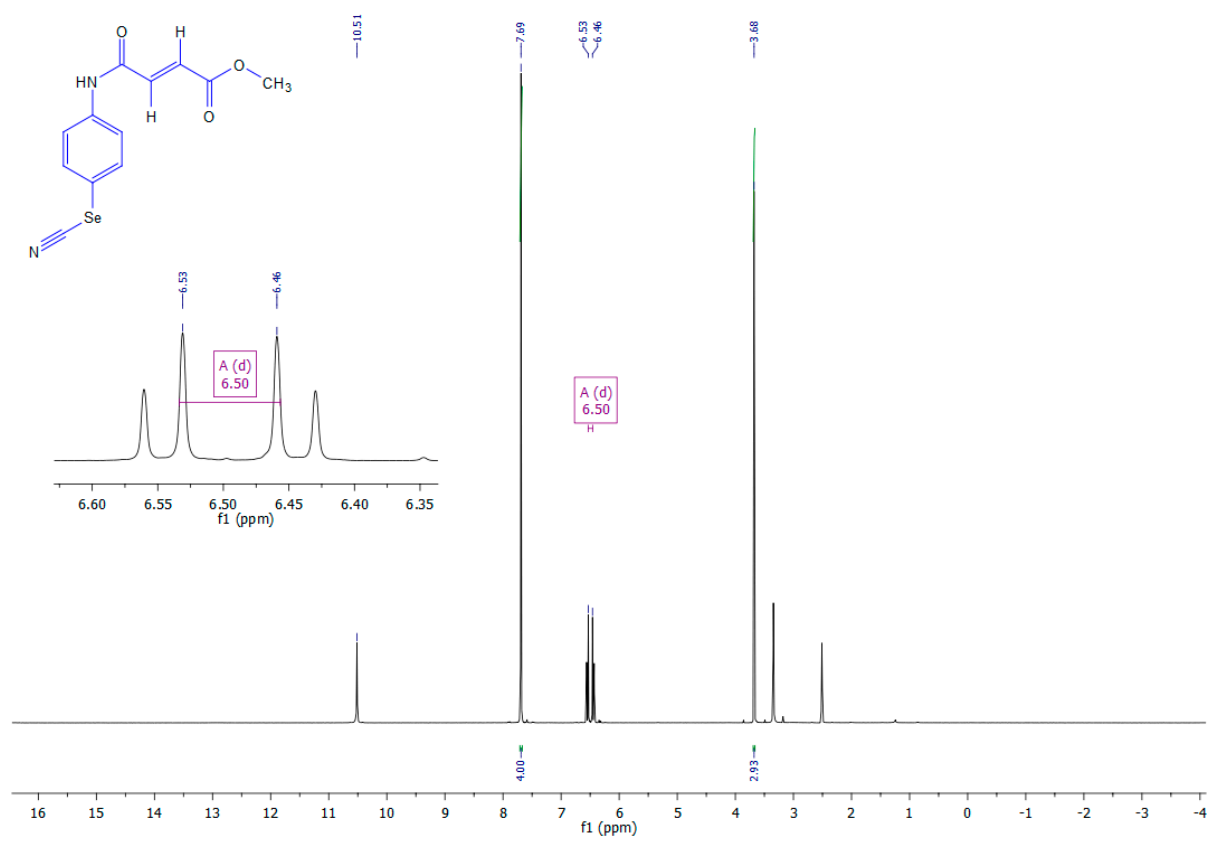

<sup>1</sup>H NMR chart of compound 4

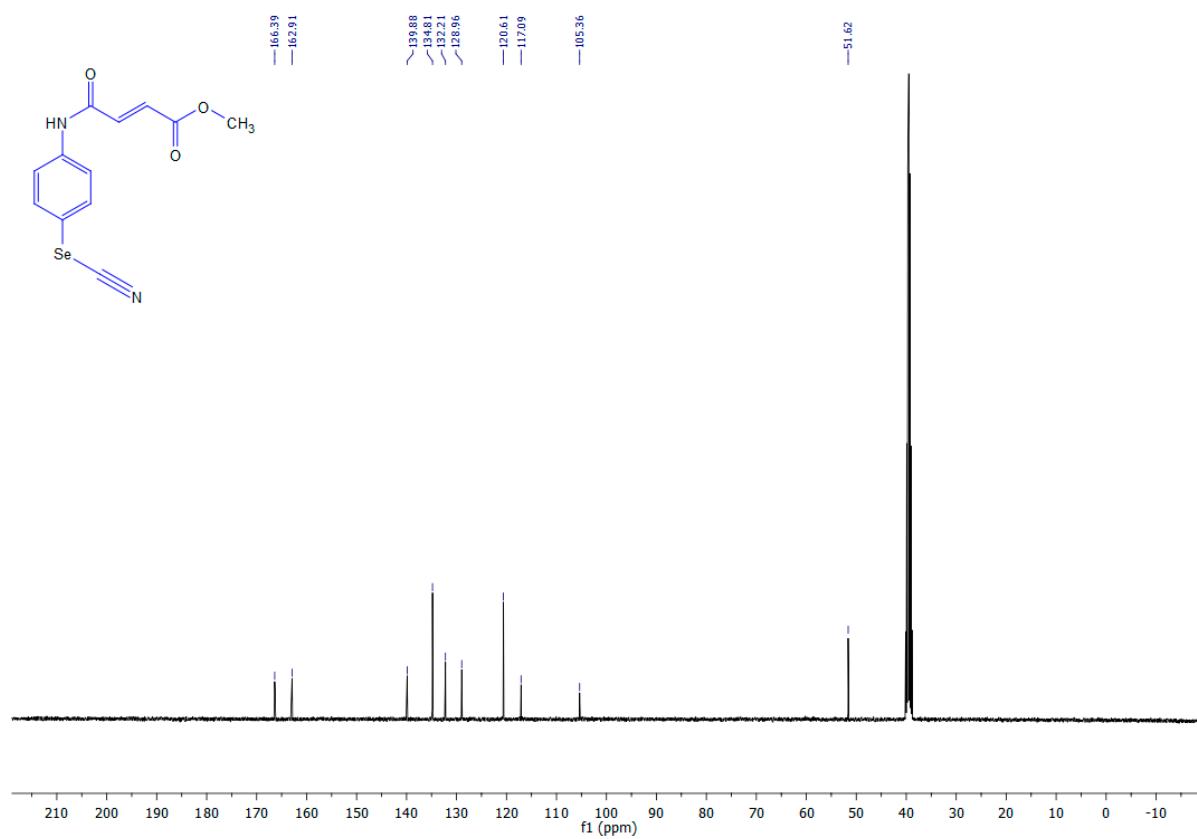

$^{13}\text{C}$ NMR chart of compound 4

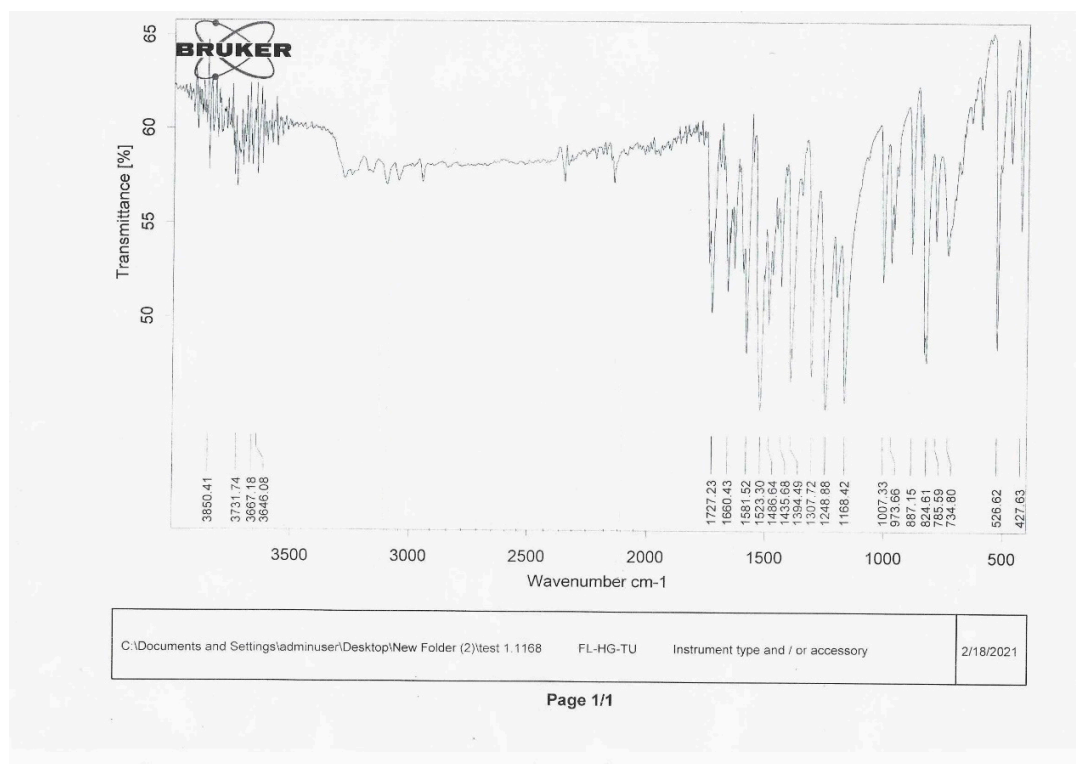

IR chart of compound 4

# Cairo University Micro Analytical Center

## DI Analysis Shimadzu Qp-2010 Plus

Sample Information  
 Analyzed by : Dr. Mai Younis  
 Analyzed : 03/01/2007 08:51:36  
 Sample Name : J1  
 Sample ID :  
 Customer Name : Dr. Mohamed Soliman - Science - Cairo  
 Data File : C:\GCMSolution\Data\Project1\U1.QGD  
 Org Data File : C:\GCMSolution\Data\Project1\U1.QGD  
 Method File : C:\GCMSolution\Data\Project1\High Temperature Op  
 Org Method File : C:\GCMSolution\Data\Project1\High Temperature Op  
 Report File :  
 Tuning File : C:\GCMSolution\System\Tune1\\_default.qgt  
 \$EndIf\$Modified by : Dr. Mai Younis  
 Modified : 03/01/2007 08:57:09

### Method

Analytical Line 1  
 IonSourceTemp : 250.00 °C  
 [MS Table]  
 --Group 1 - Event 1--  
 Start Time : 0.00min  
 End Time : 10.00min  
 ACQ Mode : Scan  
 Event Time : 0.50sec  
 Scan Speed : 1000  
 Start m/z : 50.00  
 End m/z : 510.00

Electron Voltage : 70 eV  
 Ionization Mode : EI

C:\GCMSolution\Data\Project1\U1.QGD

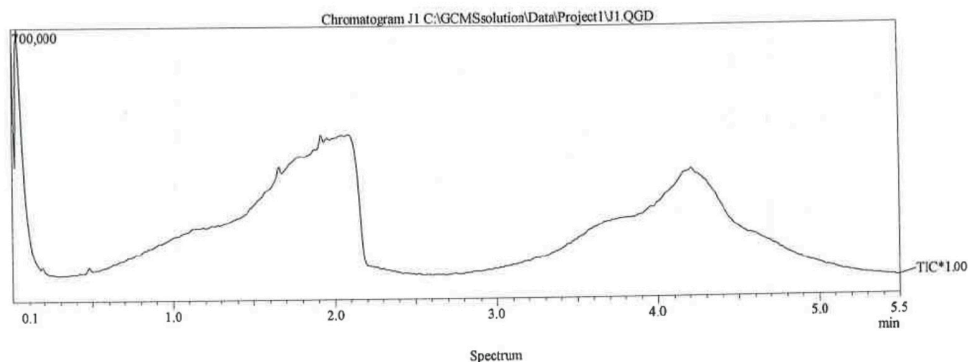

Line#:1 R.Time:2.0(Scan#:240)  
 MassPeaks:153  
 RawMode:Single 2.0(240) BasePeak:113(133438)  
 BG Mode:None Group 1 - Event 1

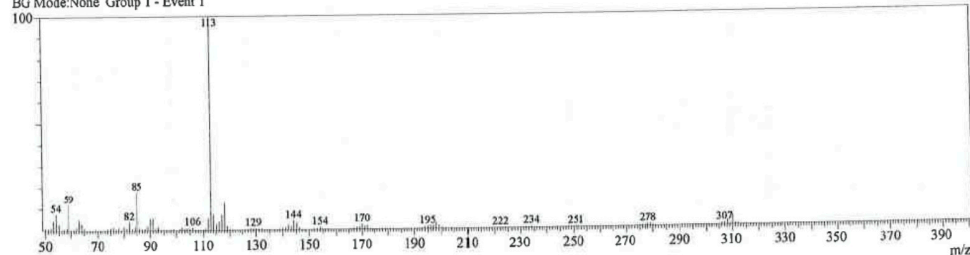

### Mass Table

Line#:1 R.Time:2.0(Scan#:240)

MassPeaks:153

RawMode:Single 2.0(240) BasePeak:113(133438)

BG Mode:None Group 1 - Event 1

| # | m/z   | Abs. In | Rel. Int. | # | m/z   | Abs. In | Rel. Int. | # | m/z   | Abs. In | Rel. Int. |
|---|-------|---------|-----------|---|-------|---------|-----------|---|-------|---------|-----------|
| 1 | 50.05 | 1593    | 1.19      | 4 | 53.00 | 5972    | 4.48      | 7 | 56.05 | 687     | 0.51      |
| 2 | 51.00 | 1282    | 0.96      | 5 | 54.00 | 10129   | 7.59      | 8 | 57.05 | 1217    | 0.91      |
| 3 | 52.05 | 1997    | 1.50      | 6 | 55.00 | 3809    | 2.85      | 9 | 58.05 | 1646    | 1.23      |

03-Jan-07 20:58:50

| #  | m/z    | Abs. In | Rel. Int. | #   | m/z    | Abs. In | Rel. Int. | #   | m/z    | Abs. In | Rel. Int. |
|----|--------|---------|-----------|-----|--------|---------|-----------|-----|--------|---------|-----------|
| 10 | 59.00  | 15969   | 11.97     | 58  | 107.05 | 607     | 0.45      | 106 | 174.00 | 294     | 0.22      |
| 11 | 60.00  | 737     | 0.55      | 59  | 108.10 | 354     | 0.27      | 107 | 179.00 | 231     | 0.17      |
| 12 | 61.05  | 850     | 0.64      | 60  | 109.10 | 270     | 0.20      | 108 | 181.00 | 303     | 0.23      |
| 13 | 62.05  | 1990    | 1.49      | 61  | 110.10 | 246     | 0.18      | 109 | 182.00 | 334     | 0.25      |
| 14 | 63.05  | 6812    | 5.10      | 62  | 111.15 | 1169    | 0.88      | 110 | 193.05 | 505     | 0.38      |
| 15 | 64.00  | 4215    | 3.16      | 63  | 112.15 | 7205    | 5.40      | 111 | 193.95 | 1133    | 0.85      |
| 16 | 65.00  | 1766    | 1.32      | 64  | 113.10 | 133438  | 100.00    | 112 | 195.00 | 1498    | 1.12      |
| 17 | 66.00  | 300     | 0.22      | 65  | 114.05 | 9392    | 7.04      | 113 | 196.00 | 1766    | 1.32      |
| 18 | 67.00  | 425     | 0.32      | 66  | 115.05 | 3720    | 2.79      | 114 | 197.05 | 2120    | 1.59      |
| 19 | 67.95  | 417     | 0.31      | 67  | 116.10 | 5118    | 3.84      | 115 | 198.05 | 3479    | 2.61      |
| 20 | 69.05  | 728     | 0.55      | 68  | 117.10 | 9236    | 6.92      | 116 | 199.05 | 1893    | 1.42      |
| 21 | 70.15  | 370     | 0.28      | 69  | 118.10 | 16642   | 12.47     | 117 | 200.00 | 705     | 0.53      |
| 22 | 71.10  | 572     | 0.43      | 70  | 119.05 | 2337    | 1.75      | 118 | 201.00 | 201     | 0.15      |
| 23 | 72.00  | 327     | 0.25      | 71  | 120.05 | 602     | 0.45      | 119 | 204.25 | 486     | 0.36      |
| 24 | 73.05  | 547     | 0.41      | 72  | 125.10 | 303     | 0.23      | 120 | 208.20 | 217     | 0.16      |
| 25 | 73.95  | 1081    | 0.81      | 73  | 126.00 | 294     | 0.22      | 121 | 222.20 | 263     | 0.20      |
| 26 | 75.05  | 1471    | 1.10      | 74  | 127.00 | 534     | 0.40      | 122 | 223.20 | 215     | 0.16      |
| 27 | 76.05  | 1933    | 1.45      | 75  | 128.05 | 909     | 0.68      | 123 | 224.20 | 306     | 0.23      |
| 28 | 77.05  | 790     | 0.59      | 76  | 129.05 | 992     | 0.74      | 124 | 230.20 | 218     | 0.16      |
| 29 | 78.00  | 1801    | 1.35      | 77  | 130.05 | 675     | 0.51      | 125 | 231.20 | 310     | 0.23      |
| 30 | 79.05  | 630     | 0.47      | 78  | 131.10 | 550     | 0.41      | 126 | 232.05 | 454     | 0.34      |
| 31 | 80.00  | 2382    | 1.79      | 79  | 132.10 | 753     | 0.56      | 127 | 233.05 | 416     | 0.31      |
| 32 | 81.05  | 1265    | 0.95      | 80  | 133.10 | 313     | 0.23      | 128 | 234.05 | 866     | 0.65      |
| 33 | 82.00  | 5273    | 3.95      | 81  | 135.10 | 244     | 0.18      | 129 | 235.10 | 201     | 0.15      |
| 34 | 83.10  | 1170    | 0.88      | 82  | 138.05 | 301     | 0.23      | 130 | 236.10 | 215     | 0.16      |
| 35 | 84.15  | 1921    | 1.44      | 83  | 139.05 | 602     | 0.45      | 131 | 248.10 | 319     | 0.24      |
| 36 | 85.05  | 23847   | 17.87     | 84  | 140.05 | 914     | 0.68      | 132 | 249.10 | 337     | 0.25      |
| 37 | 86.05  | 1449    | 1.09      | 85  | 141.05 | 1361    | 1.02      | 133 | 250.10 | 314     | 0.24      |
| 38 | 87.10  | 958     | 0.72      | 86  | 142.05 | 3143    | 2.36      | 134 | 250.95 | 406     | 0.30      |
| 39 | 88.15  | 1154    | 0.86      | 87  | 143.15 | 1966    | 1.47      | 135 | 252.05 | 488     | 0.37      |
| 40 | 89.10  | 2473    | 1.85      | 88  | 144.05 | 5600    | 4.20      | 136 | 274.10 | 308     | 0.23      |
| 41 | 90.10  | 6863    | 5.14      | 89  | 145.10 | 4322    | 3.24      | 137 | 275.05 | 385     | 0.29      |
| 42 | 91.05  | 7573    | 5.68      | 90  | 146.05 | 1295    | 0.97      | 138 | 276.10 | 783     | 0.59      |
| 43 | 92.05  | 1342    | 1.01      | 91  | 152.00 | 276     | 0.21      | 139 | 277.10 | 551     | 0.41      |
| 44 | 93.00  | 2266    | 1.70      | 92  | 153.05 | 630     | 0.47      | 140 | 278.10 | 1300    | 0.97      |
| 45 | 94.00  | 276     | 0.21      | 93  | 154.10 | 1449    | 1.09      | 141 | 279.10 | 1209    | 0.91      |
| 46 | 95.00  | 578     | 0.43      | 94  | 154.90 | 623     | 0.47      | 142 | 280.10 | 402     | 0.30      |
| 47 | 96.00  | 238     | 0.18      | 95  | 155.90 | 487     | 0.36      | 143 | 281.10 | 310     | 0.23      |
| 48 | 97.20  | 383     | 0.29      | 96  | 156.90 | 297     | 0.22      | 144 | 284.10 | 313     | 0.23      |
| 49 | 98.15  | 378     | 0.28      | 97  | 165.00 | 212     | 0.16      | 145 | 285.10 | 226     | 0.17      |
| 50 | 99.10  | 862     | 0.65      | 98  | 166.00 | 582     | 0.44      | 146 | 306.15 | 1105    | 0.83      |
| 51 | 100.05 | 330     | 0.25      | 99  | 167.00 | 921     | 0.69      | 147 | 307.10 | 1156    | 0.87      |
| 52 | 101.15 | 799     | 0.60      | 100 | 168.00 | 1546    | 1.16      | 148 | 308.10 | 2849    | 2.14      |
| 53 | 102.05 | 1604    | 1.20      | 101 | 169.05 | 1438    | 1.08      | 149 | 309.15 | 596     | 0.45      |
| 54 | 103.00 | 1105    | 0.83      | 102 | 170.00 | 3001    | 2.25      | 150 | 310.10 | 5922    | 4.44      |
| 55 | 104.00 | 1129    | 0.85      | 103 | 171.00 | 1598    | 1.20      | 151 | 311.05 | 1075    | 0.81      |
| 56 | 105.00 | 1108    | 0.83      | 104 | 172.00 | 2441    | 1.83      | 152 | 312.10 | 1116    | 0.84      |
| 57 | 106.00 | 1822    | 1.37      | 105 | 172.95 | 652     | 0.49      | 153 | 313.10 | 287     | 0.22      |

# Mass chart of compound 4

*Synthesis of N-(benzyloxy)-2-chloroacetamide (7)*

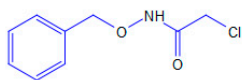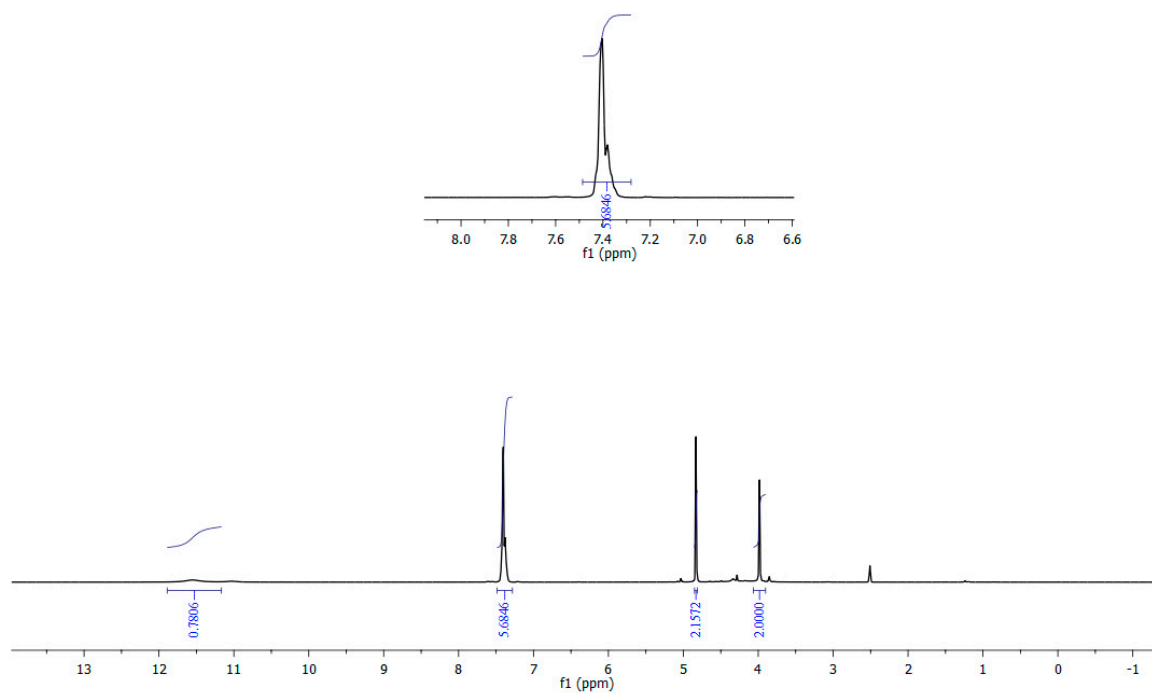

$^1\text{H}$ NMR chart of compound **7**

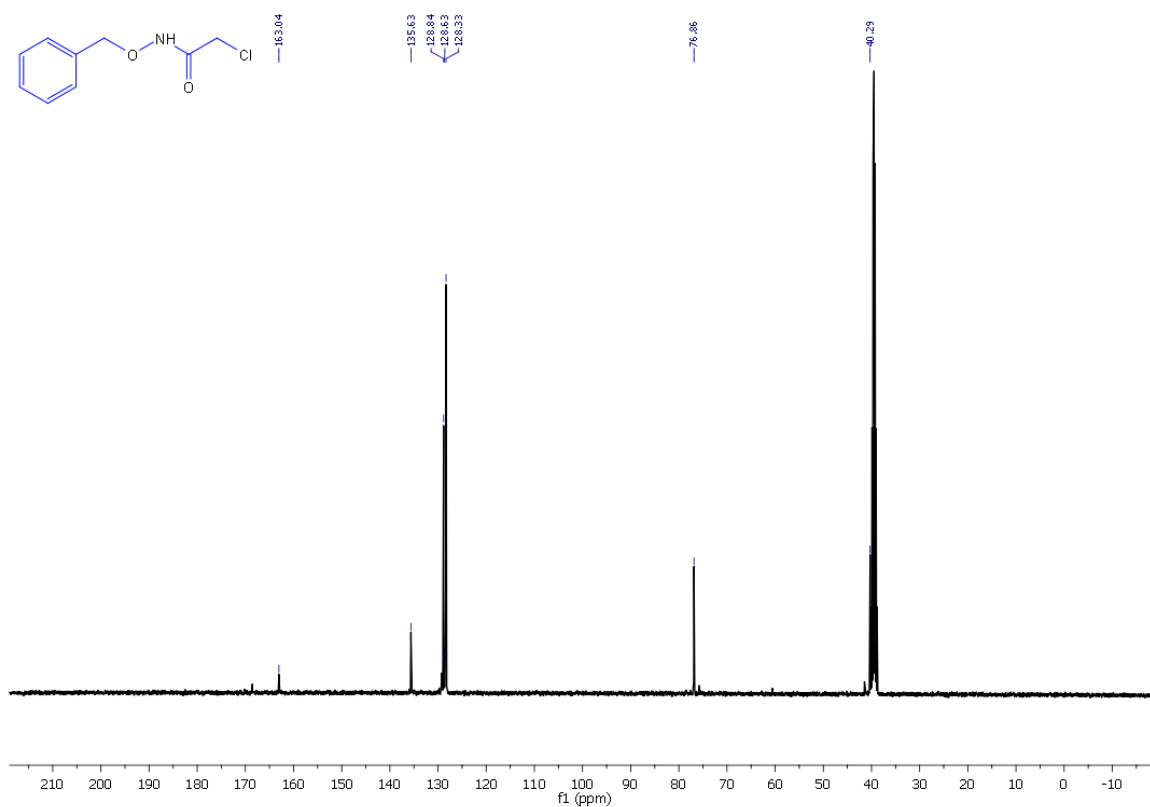

$^{13}\text{C}$ NMR chart of compound 7

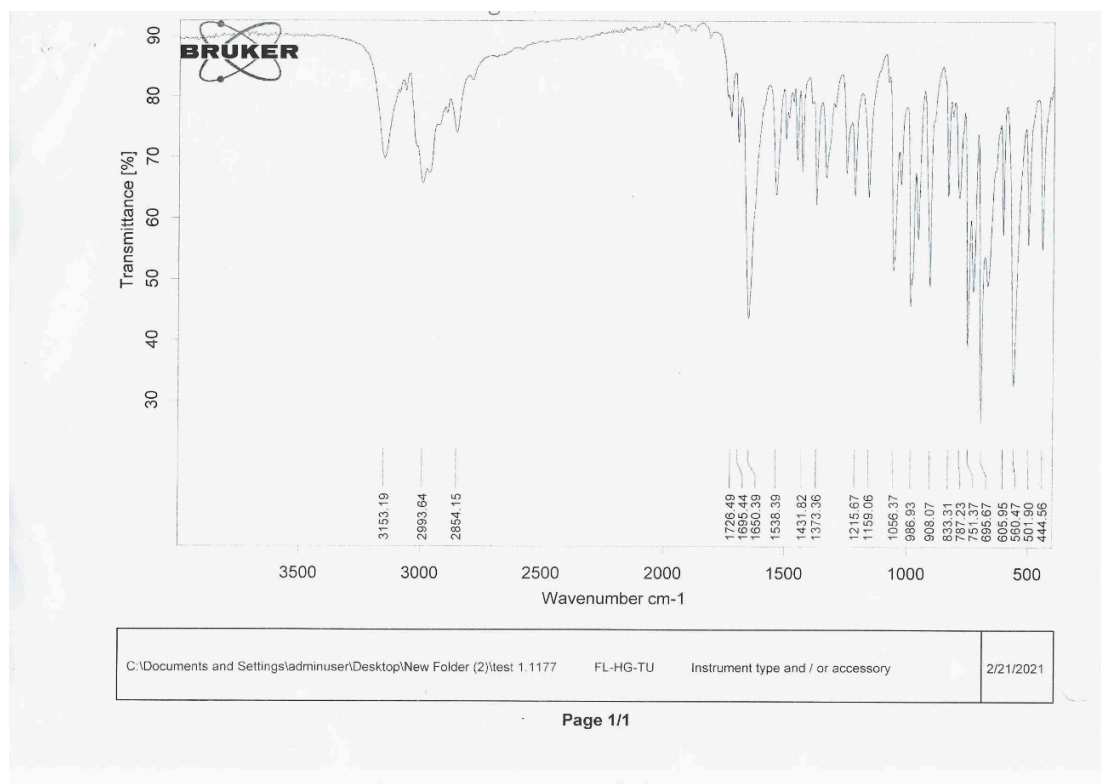

IR chart of compound 7



# **Cairo University Micro Analytical Center**

## **DI Analysis Shimadzu Qp-2010 Plus**

Sample Information  
 Analyzed by : Dr. Mai Younis  
 Analyzed : 03/01/2007 08:42:53  
 Sample Name : J3  
 Sample ID :  
 Customer Name : Dr. Mohamed Soliman - Science - Cairo  
 Data File : C:\GCMSolution\Data\Project1\U3.QGD  
 Org Data File : C:\GCMSolution\Data\Project1\U3.QGD  
 Method File : C:\GCMSolution\Data\Project1\High Temperature Op  
 Org Method File : C:\GCMSolution\Data\Project1\High Temperature Op  
 Report File :  
 Tuning File : C:\GCMSolution\System\Tune1\default.qgt  
 \$EndIt\$ Modified by : Dr. Mai Younis  
 Modified : 03/01/2007 08:48:35

### Method

==== Analytical Line 1 =====  
 IonSourceTemp :250.00 °C  
 [MS Table]  
 --Group 1 - Event 1--  
 Start Time :0.00min  
 End Time :10.00min  
 ACQ Mode :Scan  
 Event Time :0.50sec  
 Scan Speed :1000  
 Start m/z :50.00  
 End m/z :510.00  
 Electron Voltage :70 eV  
 Ionization Mode :EI

C:\GCMSolution\Data\Project1\U3.QGD

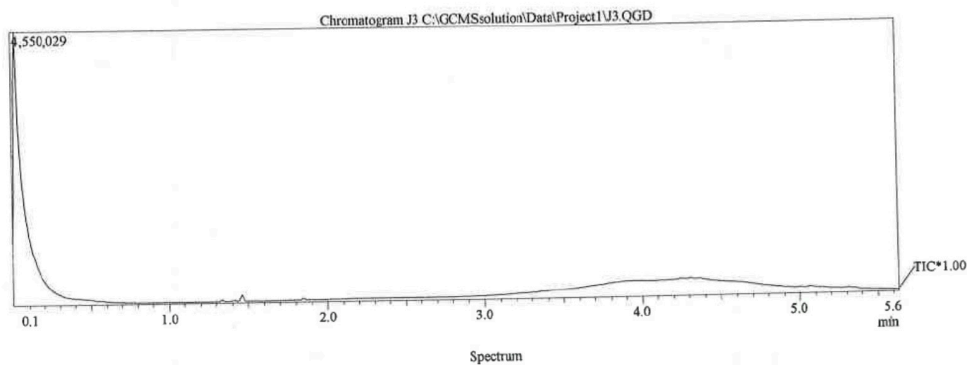

Line#:1 R.Time:4.3(Scan#:512)  
 MassPeaks:153  
 RawMode:Single 4.3(512) BasePeak:59(65519)  
 BG Mode:None Group 1 - Event 1

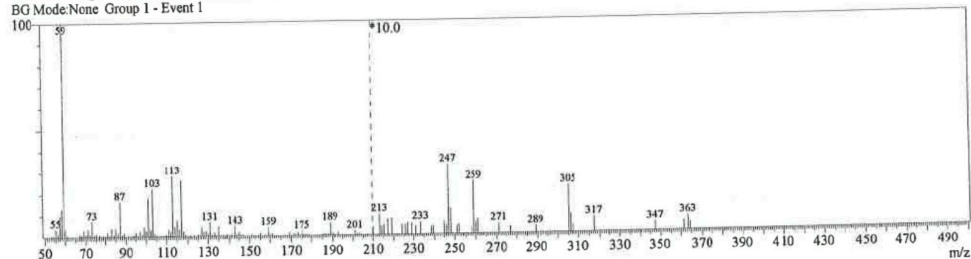

### Mass Table

Line#:1 R.Time:4.3(Scan#:512)

MassPeaks:153

RawMode:Single 4.3(512) BasePeak:59(65519)

BG Mode:None Group 1 - Event 1

| # | m/z   | Abs. In | Rel. Int. | # | m/z   | Abs. In | Rel. Int. | # | m/z   | Abs. In | Rel. Int. |
|---|-------|---------|-----------|---|-------|---------|-----------|---|-------|---------|-----------|
| 1 | 53.00 | 348     | 0.53      | 4 | 56.05 | 1156    | 1.76      | 7 | 59.05 | 65519   | 100.00    |
| 2 | 53.95 | 403     | 0.62      | 5 | 57.05 | 6546    | 9.99      | 8 | 60.00 | 2690    | 4.11      |
| 3 | 55.05 | 2596    | 3.96      | 6 | 58.05 | 8638    | 13.18     | 9 | 61.05 | 657     | 1.00      |

| #  | m/z    | Abs. In | Rel. Int. | #   | m/z    | Abs. In | Rel. Int. | #   | m/z    | Abs. In | Rel. Int. |
|----|--------|---------|-----------|-----|--------|---------|-----------|-----|--------|---------|-----------|
| 10 | 67.05  | 711     | 1.09      | 58  | 121.10 | 356     | 0.54      | 106 | 186.10 | 486     | 0.74      |
| 11 | 68.05  | 522     | 0.80      | 59  | 123.10 | 460     | 0.70      | 107 | 187.05 | 471     | 0.72      |
| 12 | 69.05  | 2365    | 3.61      | 60  | 125.10 | 647     | 0.99      | 108 | 188.25 | 412     | 0.63      |
| 13 | 70.10  | 977     | 1.49      | 61  | 126.15 | 638     | 0.97      | 109 | 189.15 | 3802    | 5.80      |
| 14 | 71.05  | 2607    | 3.98      | 62  | 127.15 | 2971    | 4.53      | 110 | 190.15 | 605     | 0.92      |
| 15 | 72.05  | 959     | 1.46      | 63  | 128.15 | 1431    | 2.18      | 111 | 191.20 | 274     | 0.42      |
| 16 | 73.05  | 4814    | 7.35      | 64  | 129.15 | 1760    | 2.69      | 112 | 193.15 | 935     | 1.43      |
| 17 | 74.05  | 598     | 0.91      | 65  | 130.15 | 778     | 1.19      | 113 | 195.20 | 209     | 0.32      |
| 18 | 75.05  | 1157    | 1.77      | 66  | 131.15 | 4233    | 6.46      | 114 | 201.15 | 1311    | 2.00      |
| 19 | 77.05  | 602     | 0.92      | 67  | 132.15 | 618     | 0.94      | 115 | 202.20 | 409     | 0.62      |
| 20 | 79.10  | 321     | 0.49      | 68  | 133.20 | 1233    | 1.88      | 116 | 203.20 | 546     | 0.83      |
| 21 | 80.10  | 265     | 0.40      | 69  | 134.25 | 462     | 0.71      | 117 | 204.20 | 210     | 0.32      |
| 22 | 81.05  | 1455    | 2.22      | 70  | 135.15 | 3046    | 4.65      | 118 | 207.20 | 220     | 0.34      |
| 23 | 82.15  | 523     | 0.80      | 71  | 136.20 | 358     | 0.55      | 119 | 210.20 | 233     | 0.36      |
| 24 | 83.10  | 2743    | 4.19      | 72  | 137.20 | 298     | 0.45      | 120 | 213.30 | 615     | 0.94      |
| 25 | 84.15  | 845     | 1.29      | 73  | 139.10 | 641     | 0.98      | 121 | 214.30 | 233     | 0.36      |
| 26 | 85.05  | 2722    | 4.15      | 74  | 140.10 | 302     | 0.46      | 122 | 215.30 | 297     | 0.45      |
| 27 | 86.15  | 1354    | 2.07      | 75  | 141.10 | 759     | 1.16      | 123 | 217.20 | 462     | 0.71      |
| 28 | 87.10  | 10878   | 16.60     | 76  | 142.15 | 312     | 0.48      | 124 | 219.20 | 487     | 0.74      |
| 29 | 88.05  | 731     | 1.12      | 77  | 143.10 | 3119    | 4.76      | 125 | 224.20 | 295     | 0.45      |
| 30 | 89.05  | 1478    | 2.26      | 78  | 144.15 | 579     | 0.88      | 126 | 226.20 | 287     | 0.44      |
| 31 | 91.15  | 410     | 0.63      | 79  | 145.10 | 1303    | 1.99      | 127 | 227.20 | 356     | 0.54      |
| 32 | 93.25  | 385     | 0.59      | 80  | 146.15 | 522     | 0.80      | 128 | 229.20 | 329     | 0.50      |
| 33 | 94.15  | 375     | 0.57      | 81  | 147.10 | 537     | 0.82      | 129 | 231.20 | 247     | 0.38      |
| 34 | 95.15  | 1540    | 2.35      | 82  | 151.10 | 694     | 1.06      | 130 | 233.40 | 367     | 0.56      |
| 35 | 96.15  | 636     | 0.97      | 83  | 152.10 | 270     | 0.41      | 131 | 238.40 | 217     | 0.33      |
| 36 | 97.10  | 1817    | 2.77      | 84  | 153.10 | 314     | 0.48      | 132 | 239.40 | 260     | 0.40      |
| 37 | 98.15  | 866     | 1.32      | 85  | 154.10 | 330     | 0.50      | 133 | 245.10 | 375     | 0.57      |
| 38 | 99.15  | 2961    | 4.52      | 86  | 155.10 | 929     | 1.42      | 134 | 246.20 | 260     | 0.40      |
| 39 | 100.15 | 1932    | 2.95      | 87  | 157.15 | 521     | 0.80      | 135 | 247.25 | 2116    | 3.23      |
| 40 | 101.10 | 12030   | 18.36     | 88  | 158.15 | 307     | 0.47      | 136 | 248.25 | 754     | 1.15      |
| 41 | 102.15 | 2166    | 3.31      | 89  | 159.10 | 2626    | 4.01      | 137 | 251.20 | 241     | 0.37      |
| 42 | 103.10 | 14703   | 22.44     | 90  | 160.05 | 499     | 0.76      | 138 | 252.20 | 294     | 0.45      |
| 43 | 104.10 | 1009    | 1.54      | 91  | 161.00 | 743     | 1.13      | 139 | 258.30 | 212     | 0.32      |
| 44 | 105.10 | 391     | 0.60      | 92  | 166.00 | 212     | 0.32      | 140 | 259.25 | 1589    | 2.43      |
| 45 | 107.10 | 305     | 0.47      | 93  | 167.00 | 311     | 0.47      | 141 | 260.30 | 350     | 0.53      |
| 46 | 108.20 | 212     | 0.32      | 94  | 169.15 | 1046    | 1.60      | 142 | 261.10 | 444     | 0.68      |
| 47 | 109.15 | 598     | 0.91      | 95  | 170.20 | 214     | 0.33      | 143 | 271.10 | 302     | 0.46      |
| 48 | 110.15 | 475     | 0.72      | 96  | 171.15 | 742     | 1.13      | 144 | 277.10 | 209     | 0.32      |
| 49 | 111.10 | 2210    | 3.37      | 97  | 172.15 | 491     | 0.75      | 145 | 289.10 | 201     | 0.31      |
| 50 | 112.15 | 1595    | 2.43      | 98  | 173.15 | 985     | 1.50      | 146 | 305.30 | 1431    | 2.18      |
| 51 | 113.10 | 18516   | 28.26     | 99  | 174.25 | 366     | 0.56      | 147 | 306.25 | 547     | 0.83      |
| 52 | 114.15 | 3014    | 4.60      | 100 | 175.15 | 1449    | 2.21      | 148 | 307.30 | 214     | 0.33      |
| 53 | 115.15 | 5055    | 7.72      | 101 | 176.15 | 347     | 0.53      | 149 | 317.40 | 449     | 0.69      |
| 54 | 116.15 | 2239    | 3.42      | 102 | 177.20 | 385     | 0.59      | 150 | 347.40 | 263     | 0.40      |
| 55 | 117.15 | 17215   | 26.27     | 103 | 177.80 | 276     | 0.42      | 151 | 361.40 | 284     | 0.43      |
| 56 | 118.20 | 1753    | 2.68      | 104 | 178.80 | 340     | 0.52      | 152 | 363.35 | 436     | 0.67      |
| 57 | 119.15 | 810     | 1.24      | 105 | 185.15 | 377     | 0.58      | 153 | 364.40 | 246     | 0.38      |

*Synthesis of 2-((4-aminophenyl)selanyl)-N-(benzyloxy)acetamide (8)*

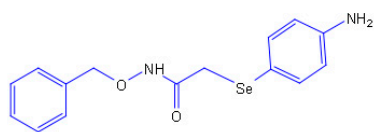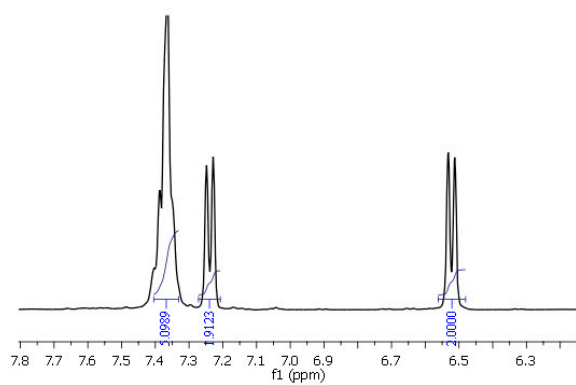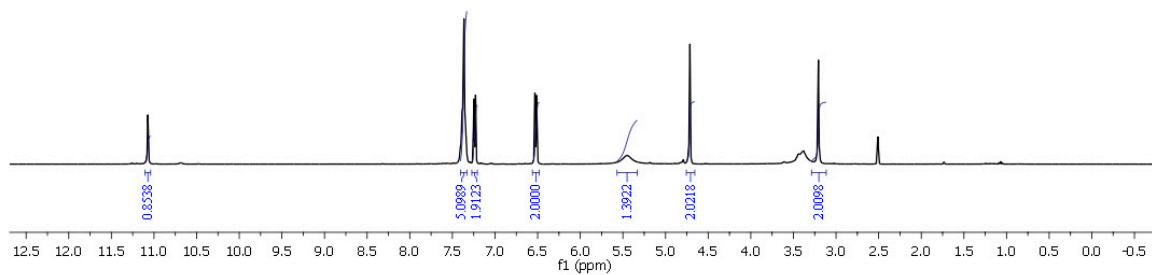

<sup>1</sup>H NMR chart of compound **8**

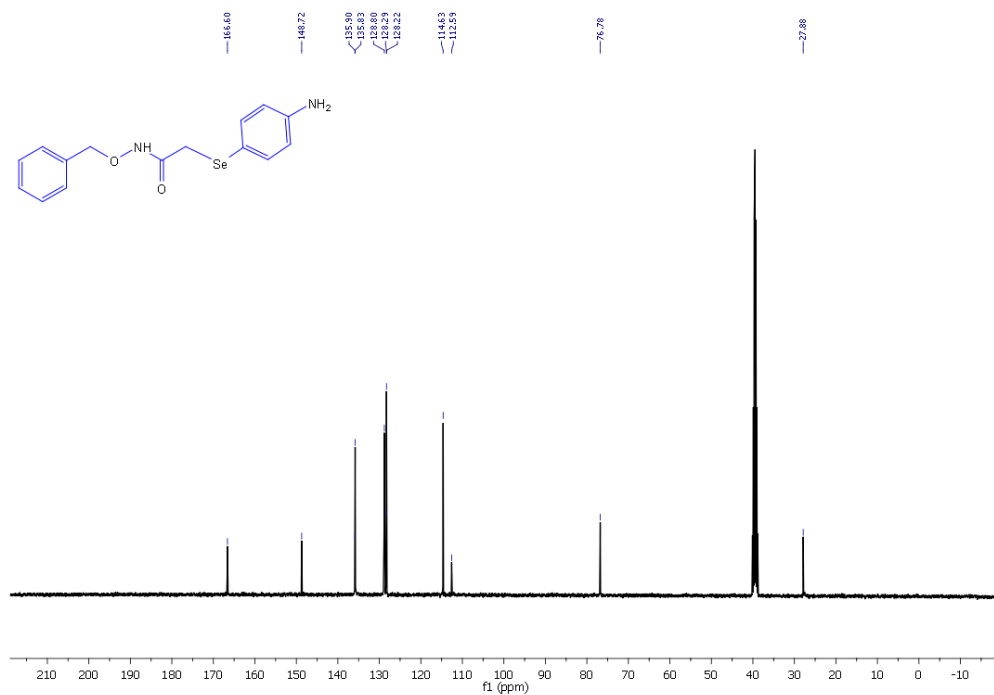

<sup>13</sup>CNMR chart of compound 8

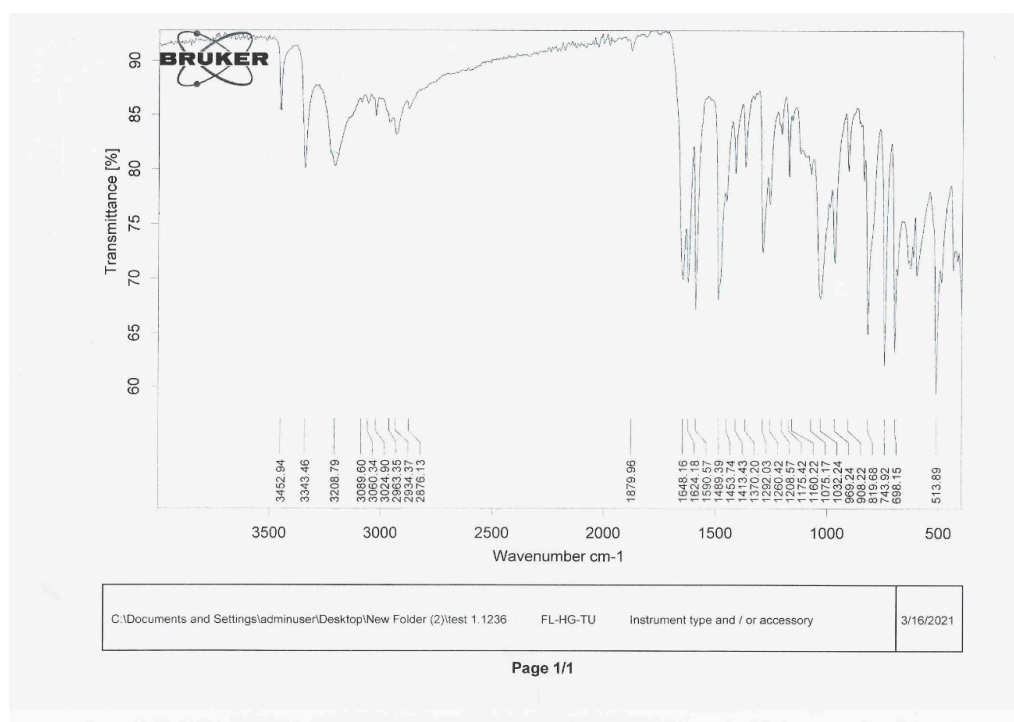

IR chart of compound 8

06-Jan-07 18:00:54

# Cairo University Micro Analytical Center

## DI Analysis Shimadzu Qp-2010 Plus

Sample Information  
Analyzed by : Dr. Mai Younis  
Analyzed : 06/01/2007 05:50:43  
Sample Name : J5  
Sample ID :  
Customer Name : Dr. Mohamed Soliman - Science - Cairo  
Data File : C:\GCMSolution\Data\Project\U5.QGD  
Org Data File : C:\GCMSolution\Data\Project\U5.QGD  
Method File : C:\GCMSolution\Data\Project\High Temperature Op  
Org Method File : C:\GCMSolution\Data\Project\High Temperature Op  
Report File :  
Tuning File : C:\GCMSolution\System\Tune1\\_default.qgt  
SEnd\Modified by : Dr. Mai Younis  
Modified : 06/01/2007 05:54:37

Method  
Analytical Line 1  
IonSourceTemp :250.00 °C  
[MS Table]  
--Group 1 - Event 1--  
Start Time :0.00min  
End Time :10.00min  
Scan :  
ACQ Mode :0.50sec  
Event Time :1000  
Scan Speed :50.00  
Start m/z :510.00  
End m/z :  
Electron Voltage :70 eV  
Ionization Mode :EI

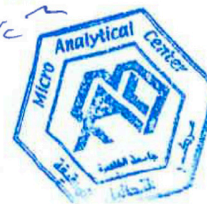

C:\GCMSolution\Data\Project\U5.QGD

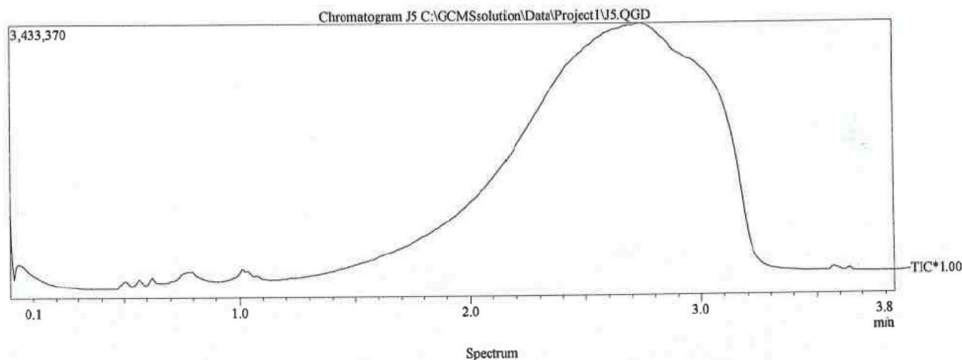

Line#:1 R.Time:2.4(Scan#:285)  
MassPeaks:182  
RawMode:Single 2.4(285) BasePeak:91(960460)  
BG Mode:None Group 1 - Event 1

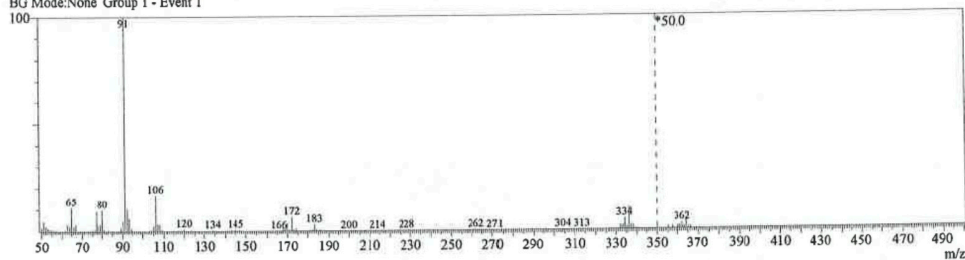

Mass Table  
Line#:1 R.Time:2.4(Scan#:285)  
MassPeaks:182  
RawMode:Single 2.4(285) BasePeak:91(960460)  
BG Mode:None Group 1 - Event 1

| # | m/z   | Abs. In | Rel. Int. | # | m/z   | Abs. In | Rel. Int. | # | m/z   | Abs. In | Rel. Int. |
|---|-------|---------|-----------|---|-------|---------|-----------|---|-------|---------|-----------|
| 1 | 50.05 | 15768   | 1.64      | 4 | 53.05 | 15780   | 1.64      | 7 | 56.05 | 4677    | 0.49      |
| 2 | 51.05 | 43235   | 4.50      | 5 | 54.05 | 9148    | 0.95      | 8 | 57.05 | 7827    | 0.81      |
| 3 | 52.05 | 21915   | 2.28      | 6 | 55.05 | 8837    | 0.92      | 9 | 58.10 | 1159    | 0.12      |

| #  | m/z    | Abs. In | Rel. Int. | #   | m/z    | Abs. In | Rel. Int. | #   | m/z    | Abs. In | Rel. Int. |
|----|--------|---------|-----------|-----|--------|---------|-----------|-----|--------|---------|-----------|
| 10 | 59.05  | 3823    | 0.40      | 68  | 117.05 | 4301    | 0.45      | 126 | 183.15 | 28298   | 2.95      |
| 11 | 60.05  | 3004    | 0.31      | 69  | 118.05 | 2899    | 0.30      | 127 | 184.15 | 7005    | 0.73      |
| 12 | 61.10  | 2431    | 0.25      | 70  | 119.10 | 2788    | 0.29      | 128 | 185.05 | 1633    | 0.17      |
| 13 | 62.10  | 7174    | 0.75      | 71  | 120.10 | 10220   | 1.06      | 129 | 186.00 | 5919    | 0.62      |
| 14 | 63.05  | 32170   | 3.35      | 72  | 121.15 | 2539    | 0.26      | 130 | 187.10 | 1247    | 0.13      |
| 15 | 64.15  | 21067   | 2.19      | 73  | 122.15 | 937     | 0.10      | 131 | 188.05 | 1063    | 0.11      |
| 16 | 65.05  | 106060  | 11.04     | 74  | 123.15 | 4636    | 0.48      | 132 | 200.10 | 298     | 0.03      |
| 17 | 66.10  | 17980   | 1.87      | 75  | 124.15 | 1292    | 0.13      | 133 | 210.10 | 201     | 0.02      |
| 18 | 67.05  | 30605   | 3.19      | 76  | 125.15 | 799     | 0.08      | 134 | 212.10 | 222     | 0.02      |
| 19 | 68.10  | 2798    | 0.29      | 77  | 126.10 | 564     | 0.06      | 135 | 213.10 | 298     | 0.03      |
| 20 | 69.10  | 5318    | 0.55      | 78  | 127.10 | 922     | 0.10      | 136 | 214.10 | 382     | 0.04      |
| 21 | 70.10  | 2114    | 0.22      | 79  | 128.05 | 703     | 0.07      | 137 | 224.10 | 233     | 0.02      |
| 22 | 71.15  | 4248    | 0.44      | 80  | 129.10 | 1506    | 0.16      | 138 | 225.10 | 255     | 0.03      |
| 23 | 72.15  | 765     | 0.08      | 81  | 130.10 | 862     | 0.09      | 139 | 226.10 | 447     | 0.05      |
| 24 | 73.05  | 3984    | 0.41      | 82  | 131.05 | 786     | 0.08      | 140 | 227.10 | 241     | 0.03      |
| 25 | 74.05  | 5212    | 0.54      | 83  | 132.10 | 911     | 0.09      | 141 | 228.10 | 951     | 0.10      |
| 26 | 75.10  | 4412    | 0.46      | 84  | 133.15 | 1465    | 0.15      | 142 | 229.10 | 358     | 0.04      |
| 27 | 76.15  | 8246    | 0.86      | 85  | 134.15 | 4315    | 0.45      | 143 | 230.15 | 747     | 0.08      |
| 28 | 77.10  | 88946   | 9.26      | 86  | 135.10 | 1537    | 0.16      | 144 | 258.10 | 623     | 0.06      |
| 29 | 78.10  | 24337   | 2.53      | 87  | 136.05 | 482     | 0.05      | 145 | 259.15 | 627     | 0.07      |
| 30 | 79.15  | 30610   | 3.19      | 88  | 137.15 | 486     | 0.05      | 146 | 260.10 | 1359    | 0.14      |
| 31 | 80.10  | 95319   | 9.92      | 89  | 138.05 | 375     | 0.04      | 147 | 261.10 | 826     | 0.09      |
| 32 | 81.10  | 8633    | 0.90      | 90  | 139.05 | 677     | 0.07      | 148 | 262.10 | 2494    | 0.26      |
| 33 | 82.15  | 2120    | 0.22      | 91  | 140.05 | 723     | 0.08      | 149 | 263.10 | 1543    | 0.16      |
| 34 | 83.15  | 5500    | 0.57      | 92  | 141.05 | 2098    | 0.22      | 150 | 264.05 | 821     | 0.09      |
| 35 | 84.15  | 2638    | 0.27      | 93  | 142.05 | 2068    | 0.22      | 151 | 265.20 | 462     | 0.05      |
| 36 | 85.15  | 3189    | 0.33      | 94  | 143.05 | 3399    | 0.35      | 152 | 270.20 | 335     | 0.03      |
| 37 | 86.10  | 1175    | 0.12      | 95  | 144.05 | 2313    | 0.24      | 153 | 271.30 | 486     | 0.05      |
| 38 | 87.10  | 1695    | 0.18      | 96  | 145.00 | 5676    | 0.59      | 154 | 295.30 | 239     | 0.02      |
| 39 | 88.15  | 1354    | 0.14      | 97  | 146.05 | 875     | 0.09      | 155 | 302.30 | 242     | 0.03      |
| 40 | 89.10  | 15700   | 1.63      | 98  | 147.00 | 1714    | 0.18      | 156 | 304.20 | 569     | 0.06      |
| 41 | 90.15  | 44615   | 4.65      | 99  | 148.10 | 628     | 0.07      | 157 | 313.45 | 508     | 0.05      |
| 42 | 91.10  | 960460  | 100.00    | 100 | 149.10 | 572     | 0.06      | 158 | 319.40 | 210     | 0.02      |
| 43 | 92.10  | 98228   | 10.23     | 101 | 150.10 | 220     | 0.02      | 159 | 321.40 | 375     | 0.04      |
| 44 | 93.10  | 56674   | 5.90      | 102 | 151.10 | 303     | 0.03      | 160 | 330.20 | 1868    | 0.19      |
| 45 | 94.10  | 11602   | 1.21      | 103 | 152.00 | 396     | 0.04      | 161 | 331.25 | 952     | 0.10      |
| 46 | 95.10  | 4519    | 0.47      | 104 | 153.00 | 447     | 0.05      | 162 | 332.20 | 18135   | 1.89      |
| 47 | 96.15  | 2320    | 0.24      | 105 | 153.95 | 404     | 0.04      | 163 | 333.20 | 18686   | 1.95      |
| 48 | 97.15  | 3774    | 0.39      | 106 | 155.00 | 348     | 0.04      | 164 | 334.20 | 47150   | 4.91      |
| 49 | 98.15  | 2232    | 0.23      | 107 | 155.90 | 390     | 0.04      | 165 | 335.25 | 12104   | 1.26      |
| 50 | 99.15  | 1190    | 0.12      | 108 | 156.90 | 402     | 0.04      | 166 | 336.20 | 96114   | 10.01     |
| 51 | 100.15 | 506     | 0.05      | 109 | 158.00 | 492     | 0.05      | 167 | 337.15 | 18937   | 1.97      |
| 52 | 101.15 | 929     | 0.10      | 110 | 159.00 | 238     | 0.02      | 168 | 338.20 | 19132   | 1.99      |
| 53 | 102.10 | 990     | 0.10      | 111 | 160.00 | 217     | 0.02      | 169 | 339.15 | 3752    | 0.39      |
| 54 | 103.15 | 1634    | 0.17      | 112 | 165.05 | 553     | 0.06      | 170 | 340.15 | 624     | 0.06      |
| 55 | 104.15 | 7689    | 0.80      | 113 | 166.00 | 1567    | 0.16      | 171 | 341.25 | 362     | 0.04      |
| 56 | 105.15 | 24236   | 2.52      | 114 | 167.05 | 1160    | 0.12      | 172 | 342.20 | 281     | 0.03      |
| 57 | 106.15 | 160312  | 16.69     | 115 | 168.05 | 13576   | 1.41      | 173 | 344.20 | 388     | 0.04      |
| 58 | 107.15 | 32112   | 3.34      | 116 | 169.05 | 13380   | 1.39      | 174 | 355.20 | 238     | 0.02      |
| 59 | 108.10 | 29788   | 3.10      | 117 | 170.00 | 31930   | 3.32      | 175 | 357.20 | 249     | 0.03      |
| 60 | 109.15 | 6176    | 0.64      | 118 | 171.05 | 5744    | 0.60      | 176 | 360.20 | 282     | 0.03      |
| 61 | 110.15 | 1323    | 0.14      | 119 | 172.05 | 61287   | 6.38      | 177 | 361.20 | 292     | 0.03      |
| 62 | 111.15 | 1816    | 0.19      | 120 | 172.95 | 5359    | 0.56      | 178 | 362.20 | 513     | 0.05      |
| 63 | 112.15 | 1175    | 0.12      | 121 | 174.05 | 10628   | 1.11      | 179 | 363.20 | 212     | 0.02      |
| 64 | 113.10 | 1337    | 0.14      | 122 | 174.95 | 915     | 0.10      | 180 | 364.20 | 870     | 0.09      |
| 65 | 114.10 | 1284    | 0.13      | 123 | 180.20 | 590     | 0.06      | 181 | 365.20 | 207     | 0.02      |
| 66 | 115.05 | 2947    | 0.31      | 124 | 181.25 | 654     | 0.07      | 182 | 366.20 | 242     | 0.03      |
| 67 | 116.05 | 1880    | 0.20      | 125 | 182.25 | 5051    | 0.53      |     |        |         |           |

*Synthesis of 2-((4-acetamidophenyl)selanyl)-N-(benzyloxy)acetamide (9)*

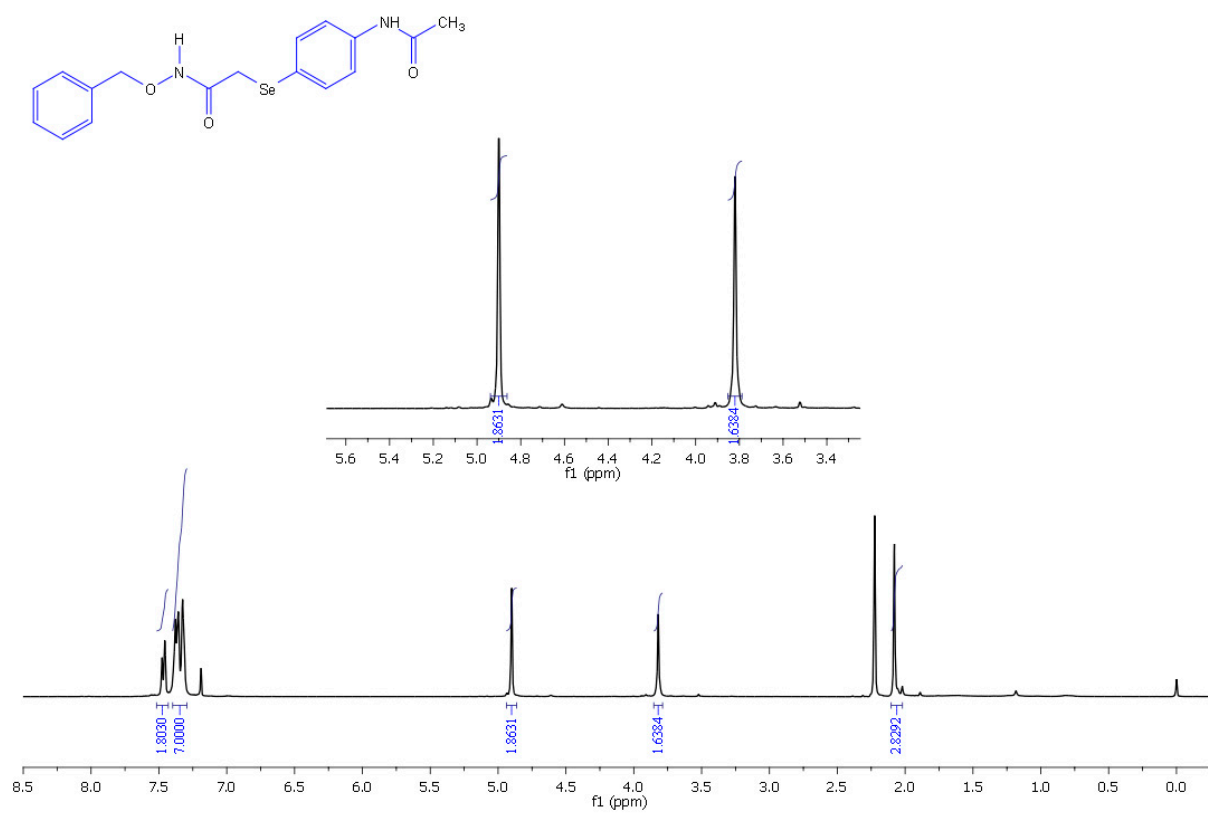

<sup>1</sup>H NMR chart of compound 9

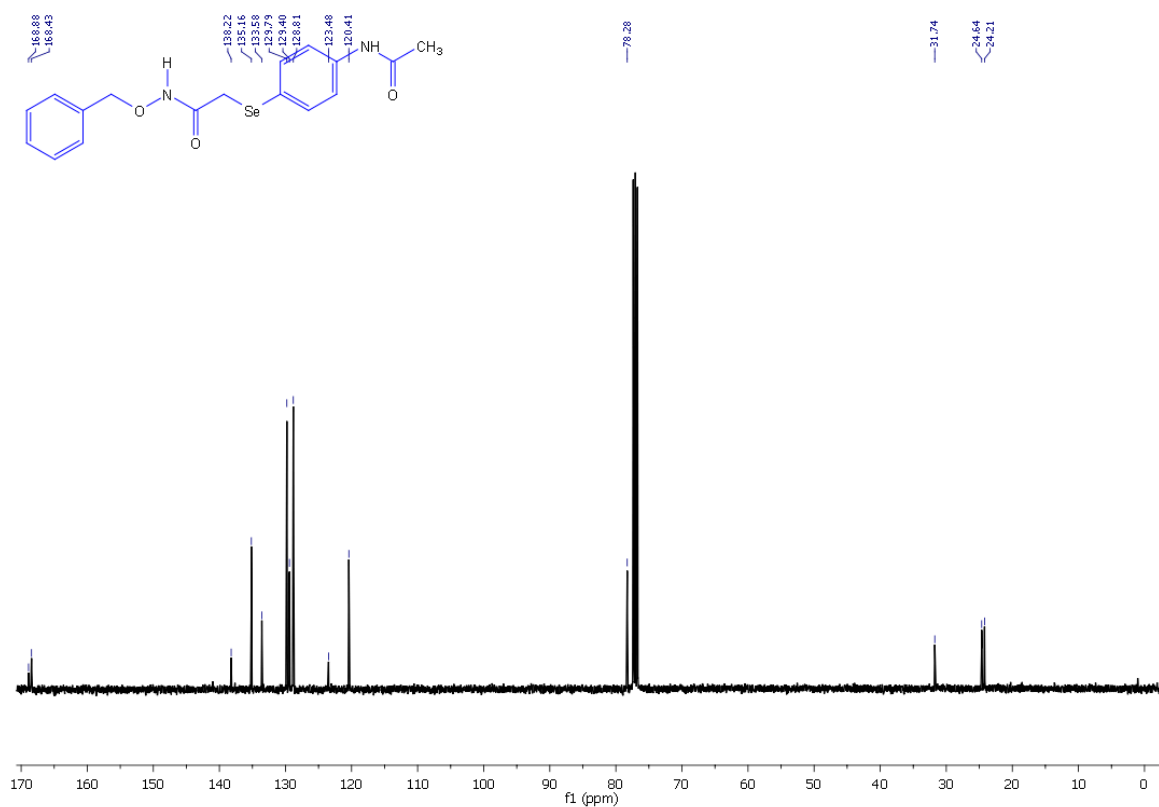

$^{13}\text{C}$ NMR chart of compound 9



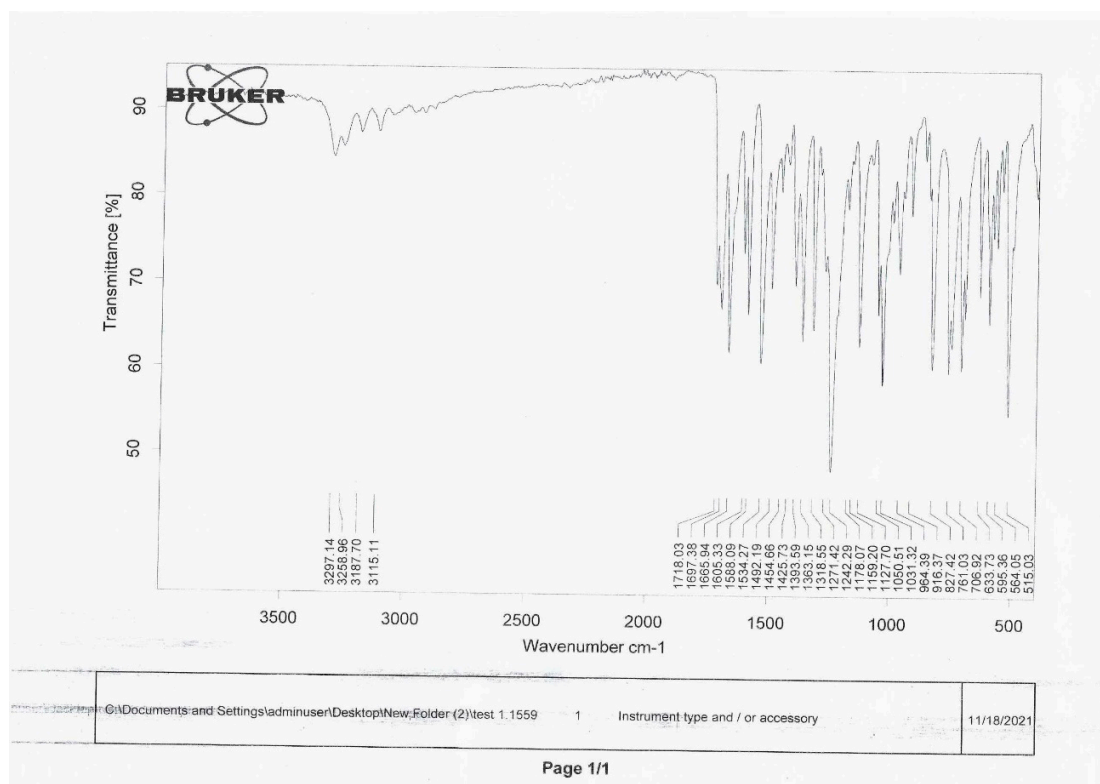

IR chart of compound 9

# Cairo University Micro Analytical Center

## DI Analysis Shimadzu Qp-2010 Plus

Sample Information  
 Analyzed by : Dr. Mai Younis  
 Analyzed : 06/01/2007 06:02:32  
 Sample Name : J7  
 Sample ID :  
 Customer Name : Dr. Mohamed Soliman - Science - Cairo  
 Data File : C:\GCMSSolution\Data\Project1\U7.QGD  
 Org Data File : C:\GCMSSolution\Data\Project1\U7.QGD  
 Method File : C:\GCMSSolution\Data\Project1\High Temperature Op  
 Org Method File : C:\GCMSSolution\Data\Project1\High Temperature Op  
 Report File :  
 Tuning File : C:\GCMSSolution\System\Tune1\default.qgt  
 \$EndIf\$Modified by : Dr. Mai Younis  
 Modified : 06/01/2007 06:08:09

Method  
 Analytical Line 1  
 IonSourceTemp : 250.00 °C  
 [MS Table]  
 --Group 1 - Event 1--  
 Start Time : 0.00min  
 End Time : 10.00min  
 ACQ Mode : Scan  
 Event Time : 0.50sec  
 Scan Speed : 1000  
 Start m/z : 50.00  
 End m/z : 510.00  
 Electron Voltage : 70 eV  
 Ionization Mode : EI

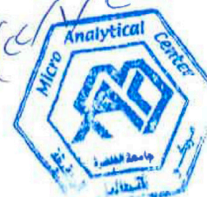

C:\GCMSSolution\Data\Project1\U7.QGD

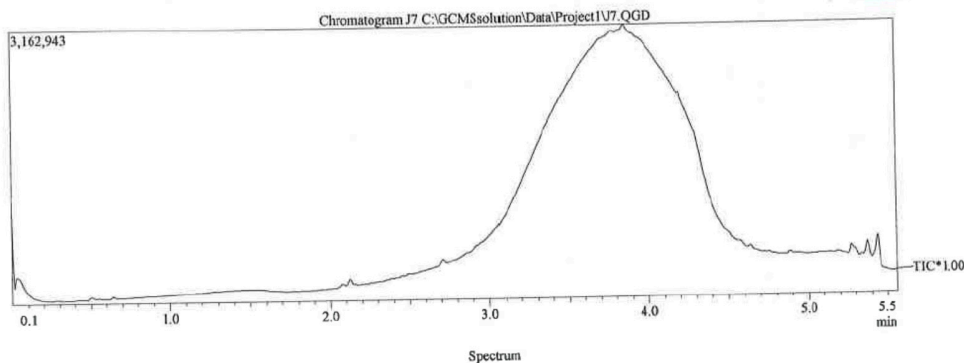

Line#1 R.Time:3.6(Scan#:434)  
 MassPeaks:264  
 RawMode:Single 3.6(434) BasePeak:91(1210535)  
 BG Mode:None Group 1 - Event 1

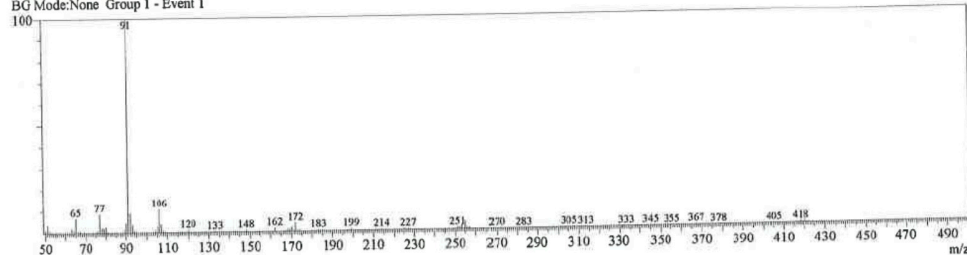

### Mass Table

Line#1 R.Time:3.6(Scan#:434)

MassPeaks:264

RawMode:Single 3.6(434) BasePeak:91(1210535)

BG Mode:None Group 1 - Event 1

| # | m/z   | Abs. In | Rel. Int. | # | m/z   | Abs. In | Rel. Int. | # | m/z   | Abs. In | Rel. Int. |
|---|-------|---------|-----------|---|-------|---------|-----------|---|-------|---------|-----------|
| 1 | 50.05 | 15477   | 1.28      | 4 | 53.05 | 7183    | 0.59      | 7 | 56.10 | 3204    | 0.26      |
| 2 | 51.05 | 45107   | 3.73      | 5 | 54.05 | 3209    | 0.27      | 8 | 57.10 | 8273    | 0.68      |
| 3 | 52.05 | 13698   | 1.13      | 6 | 55.05 | 7711    | 0.64      | 9 | 58.05 | 1463    | 0.12      |

| #  | m/z    | Abs. In | Rel. Int. | #   | m/z    | Abs. In | Rel. Int. | #   | m/z    | Abs. In | Rel. Int. |
|----|--------|---------|-----------|-----|--------|---------|-----------|-----|--------|---------|-----------|
| 10 | 59.05  | 1648    | 0.14      | 79  | 128.15 | 2296    | 0.19      | 148 | 211.10 | 2118    | 0.17      |
| 11 | 60.00  | 3386    | 0.28      | 80  | 129.15 | 1947    | 0.16      | 149 | 212.05 | 3257    | 0.27      |
| 12 | 61.05  | 1703    | 0.14      | 81  | 130.10 | 1274    | 0.11      | 150 | 213.15 | 1940    | 0.16      |
| 13 | 62.10  | 5530    | 0.46      | 82  | 131.20 | 1105    | 0.09      | 151 | 214.10 | 5497    | 0.45      |
| 14 | 63.05  | 26216   | 2.17      | 83  | 132.15 | 3370    | 0.28      | 152 | 215.10 | 1975    | 0.16      |
| 15 | 64.15  | 13903   | 1.15      | 84  | 133.15 | 4647    | 0.38      | 153 | 216.10 | 1086    | 0.09      |
| 16 | 65.05  | 81929   | 6.77      | 85  | 134.15 | 2904    | 0.24      | 154 | 217.10 | 279     | 0.02      |
| 17 | 66.10  | 8124    | 0.67      | 86  | 135.15 | 2204    | 0.18      | 155 | 223.20 | 972     | 0.08      |
| 18 | 67.10  | 11962   | 0.99      | 87  | 136.15 | 1953    | 0.16      | 156 | 224.20 | 2063    | 0.17      |
| 19 | 68.10  | 2002    | 0.17      | 88  | 137.15 | 871     | 0.07      | 157 | 225.15 | 4873    | 0.40      |
| 20 | 69.10  | 5015    | 0.41      | 89  | 138.05 | 415     | 0.03      | 158 | 226.10 | 2642    | 0.22      |
| 21 | 70.10  | 2759    | 0.23      | 90  | 139.05 | 1003    | 0.08      | 159 | 227.10 | 5913    | 0.49      |
| 22 | 71.10  | 4161    | 0.34      | 91  | 140.05 | 1472    | 0.12      | 160 | 228.10 | 3570    | 0.29      |
| 23 | 72.15  | 679     | 0.06      | 92  | 141.05 | 2462    | 0.20      | 161 | 229.10 | 1793    | 0.15      |
| 24 | 73.10  | 2354    | 0.19      | 93  | 142.05 | 2465    | 0.20      | 162 | 230.15 | 881     | 0.07      |
| 25 | 74.05  | 5066    | 0.42      | 94  | 143.05 | 3038    | 0.25      | 163 | 231.10 | 250     | 0.02      |
| 26 | 75.10  | 4806    | 0.40      | 95  | 144.05 | 3335    | 0.28      | 164 | 239.25 | 551     | 0.05      |
| 27 | 76.15  | 10571   | 0.87      | 96  | 145.05 | 3859    | 0.32      | 165 | 240.20 | 220     | 0.02      |
| 28 | 77.10  | 106641  | 8.81      | 97  | 146.10 | 1494    | 0.12      | 166 | 241.20 | 247     | 0.02      |
| 29 | 78.10  | 26940   | 2.23      | 98  | 147.15 | 2016    | 0.17      | 167 | 242.20 | 209     | 0.02      |
| 30 | 79.10  | 25310   | 2.09      | 99  | 148.15 | 9010    | 0.74      | 168 | 249.15 | 781     | 0.06      |
| 31 | 80.10  | 35786   | 2.96      | 100 | 149.15 | 1723    | 0.14      | 169 | 250.15 | 524     | 0.04      |
| 32 | 81.10  | 5642    | 0.47      | 101 | 150.15 | 1046    | 0.09      | 170 | 251.15 | 8107    | 0.67      |
| 33 | 82.15  | 1861    | 0.15      | 102 | 151.10 | 657     | 0.05      | 171 | 252.15 | 8960    | 0.74      |
| 34 | 83.15  | 4489    | 0.37      | 103 | 152.15 | 595     | 0.05      | 172 | 253.10 | 21750   | 1.80      |
| 35 | 84.15  | 2733    | 0.23      | 104 | 153.05 | 787     | 0.07      | 173 | 254.15 | 4718    | 0.39      |
| 36 | 85.15  | 3762    | 0.31      | 105 | 154.10 | 762     | 0.06      | 174 | 255.10 | 43601   | 3.60      |
| 37 | 86.15  | 1819    | 0.15      | 106 | 155.10 | 2196    | 0.18      | 175 | 256.05 | 8298    | 0.69      |
| 38 | 87.10  | 1862    | 0.15      | 107 | 156.10 | 2415    | 0.20      | 176 | 257.15 | 9296    | 0.77      |
| 39 | 88.15  | 2303    | 0.19      | 108 | 157.10 | 914     | 0.08      | 177 | 258.05 | 1894    | 0.16      |
| 40 | 89.10  | 18366   | 1.52      | 109 | 158.00 | 650     | 0.05      | 178 | 259.10 | 476     | 0.04      |
| 41 | 90.15  | 53112   | 4.39      | 110 | 159.00 | 378     | 0.03      | 179 | 260.15 | 669     | 0.06      |
| 42 | 91.10  | 121053  | 100.00    | 111 | 161.15 | 923     | 0.08      | 180 | 261.15 | 606     | 0.05      |
| 43 | 92.10  | 107703  | 8.90      | 112 | 162.10 | 20801   | 1.72      | 181 | 262.15 | 1108    | 0.09      |
| 44 | 93.10  | 42689   | 3.53      | 113 | 163.10 | 2178    | 0.18      | 182 | 263.15 | 853     | 0.07      |
| 45 | 94.10  | 8558    | 0.71      | 114 | 164.05 | 538     | 0.04      | 183 | 264.25 | 876     | 0.07      |
| 46 | 95.10  | 4926    | 0.41      | 115 | 165.05 | 997     | 0.08      | 184 | 265.20 | 550     | 0.05      |
| 47 | 96.20  | 1993    | 0.16      | 116 | 166.05 | 2864    | 0.24      | 185 | 266.15 | 374     | 0.03      |
| 48 | 97.15  | 3817    | 0.32      | 117 | 167.05 | 3483    | 0.29      | 186 | 267.15 | 389     | 0.03      |
| 49 | 98.15  | 3390    | 0.28      | 118 | 168.05 | 10991   | 0.91      | 187 | 268.15 | 723     | 0.06      |
| 50 | 99.15  | 1680    | 0.14      | 119 | 169.05 | 10983   | 0.91      | 188 | 269.15 | 466     | 0.04      |
| 51 | 100.10 | 3327    | 0.27      | 120 | 170.05 | 24761   | 2.05      | 189 | 270.10 | 1394    | 0.12      |
| 52 | 101.10 | 2022    | 0.17      | 121 | 171.05 | 10754   | 0.89      | 190 | 271.20 | 660     | 0.05      |
| 53 | 102.15 | 1829    | 0.15      | 122 | 172.05 | 46264   | 3.82      | 191 | 272.15 | 1298    | 0.11      |
| 54 | 103.15 | 3258    | 0.27      | 123 | 173.00 | 5638    | 0.47      | 192 | 273.05 | 516     | 0.04      |
| 55 | 104.15 | 10203   | 0.84      | 124 | 174.05 | 8057    | 0.67      | 193 | 274.00 | 450     | 0.04      |
| 56 | 105.15 | 32274   | 2.67      | 125 | 175.10 | 1546    | 0.13      | 194 | 275.20 | 390     | 0.03      |
| 57 | 106.15 | 132039  | 10.91     | 126 | 176.10 | 407     | 0.03      | 195 | 276.20 | 238     | 0.02      |
| 58 | 107.15 | 42954   | 3.55      | 127 | 180.15 | 742     | 0.06      | 196 | 281.20 | 337     | 0.03      |
| 59 | 108.10 | 9614    | 0.79      | 128 | 181.15 | 1412    | 0.12      | 197 | 283.10 | 562     | 0.05      |
| 60 | 109.15 | 3215    | 0.27      | 129 | 182.15 | 2914    | 0.24      | 198 | 284.10 | 273     | 0.02      |
| 61 | 110.20 | 1223    | 0.10      | 130 | 183.15 | 6155    | 0.51      | 199 | 285.20 | 428     | 0.04      |
| 62 | 111.20 | 1921    | 0.16      | 131 | 184.15 | 4073    | 0.34      | 200 | 287.20 | 241     | 0.02      |
| 63 | 112.15 | 1332    | 0.11      | 132 | 185.05 | 4157    | 0.34      | 201 | 293.20 | 346     | 0.03      |
| 64 | 113.15 | 1333    | 0.11      | 133 | 186.05 | 3933    | 0.32      | 202 | 294.15 | 368     | 0.03      |
| 65 | 114.10 | 1834    | 0.15      | 134 | 187.05 | 1321    | 0.11      | 203 | 295.15 | 746     | 0.06      |
| 66 | 115.10 | 3858    | 0.32      | 135 | 188.10 | 698     | 0.06      | 204 | 296.15 | 453     | 0.04      |
| 67 | 116.10 | 3359    | 0.28      | 136 | 189.10 | 278     | 0.02      | 205 | 297.20 | 1457    | 0.12      |
| 68 | 117.05 | 4485    | 0.37      | 137 | 193.10 | 220     | 0.02      | 206 | 298.15 | 822     | 0.07      |
| 69 | 118.10 | 4479    | 0.37      | 138 | 196.10 | 201     | 0.02      | 207 | 299.20 | 889     | 0.07      |
| 70 | 119.15 | 3593    | 0.30      | 139 | 197.25 | 338     | 0.03      | 208 | 300.15 | 770     | 0.06      |
| 71 | 120.10 | 14065   | 1.16      | 140 | 198.25 | 790     | 0.07      | 209 | 301.15 | 1391    | 0.11      |
| 72 | 121.15 | 2792    | 0.23      | 141 | 199.15 | 9156    | 0.76      | 210 | 302.20 | 1428    | 0.12      |
| 73 | 122.20 | 954     | 0.08      | 142 | 200.10 | 1450    | 0.12      | 211 | 303.20 | 2758    | 0.23      |
| 74 | 123.20 | 2657    | 0.22      | 143 | 206.20 | 2641    | 0.22      | 212 | 304.20 | 1407    | 0.12      |
| 75 | 124.20 | 1007    | 0.08      | 144 | 207.30 | 396     | 0.03      | 213 | 305.20 | 3174    | 0.26      |
| 76 | 125.20 | 844     | 0.07      | 145 | 208.30 | 354     | 0.03      | 214 | 306.15 | 874     | 0.07      |
| 77 | 126.15 | 784     | 0.06      | 146 | 209.15 | 350     | 0.03      | 215 | 307.20 | 607     | 0.05      |
| 78 | 127.15 | 1405    | 0.12      | 147 | 210.10 | 1562    | 0.13      | 216 | 310.50 | 337     | 0.03      |

06-Jan-07 18:09:45

| #   | m/z    | Abs. In | Rel. Int. | #   | m/z    | Abs. In | Rel. Int. | #   | m/z    | Abs. In | Rel. Int. |
|-----|--------|---------|-----------|-----|--------|---------|-----------|-----|--------|---------|-----------|
| 217 | 311.45 | 424     | 0.04      | 233 | 344.25 | 389     | 0.03      | 249 | 380.20 | 218     | 0.02      |
| 218 | 312.45 | 517     | 0.04      | 234 | 345.20 | 1706    | 0.14      | 250 | 381.20 | 287     | 0.02      |
| 219 | 313.50 | 1609    | 0.13      | 235 | 346.20 | 561     | 0.05      | 251 | 383.20 | 215     | 0.02      |
| 220 | 314.45 | 916     | 0.08      | 236 | 347.25 | 485     | 0.04      | 252 | 390.20 | 209     | 0.02      |
| 221 | 315.25 | 566     | 0.05      | 237 | 348.30 | 214     | 0.02      | 253 | 404.25 | 530     | 0.04      |
| 222 | 316.25 | 555     | 0.05      | 238 | 353.30 | 204     | 0.02      | 254 | 405.25 | 900     | 0.07      |
| 223 | 317.20 | 849     | 0.07      | 239 | 354.30 | 222     | 0.02      | 255 | 406.30 | 270     | 0.02      |
| 224 | 318.20 | 660     | 0.05      | 240 | 355.45 | 482     | 0.04      | 256 | 414.30 | 212     | 0.02      |
| 225 | 319.20 | 295     | 0.02      | 241 | 366.35 | 412     | 0.03      | 257 | 416.25 | 2962    | 0.24      |
| 226 | 331.20 | 238     | 0.02      | 242 | 367.30 | 4286    | 0.35      | 258 | 417.25 | 2955    | 0.24      |
| 227 | 333.20 | 258     | 0.02      | 243 | 368.30 | 1478    | 0.12      | 259 | 418.20 | 7457    | 0.62      |
| 228 | 339.45 | 682     | 0.06      | 244 | 369.35 | 397     | 0.03      | 260 | 419.25 | 2100    | 0.17      |
| 229 | 340.20 | 218     | 0.02      | 245 | 375.30 | 207     | 0.02      | 261 | 420.20 | 14682   | 1.21      |
| 230 | 341.20 | 674     | 0.06      | 246 | 376.30 | 351     | 0.03      | 262 | 421.15 | 3707    | 0.31      |
| 231 | 342.25 | 627     | 0.05      | 247 | 377.30 | 220     | 0.02      | 263 | 422.20 | 3202    | 0.26      |
| 232 | 343.20 | 954     | 0.08      | 248 | 378.20 | 484     | 0.04      | 264 | 423.15 | 741     | 0.06      |

# Mass chart of compound 9

*Synthesis of N-(benzyloxy)-2-((4-formamidophenyl)selanyl)acetamide (10)*

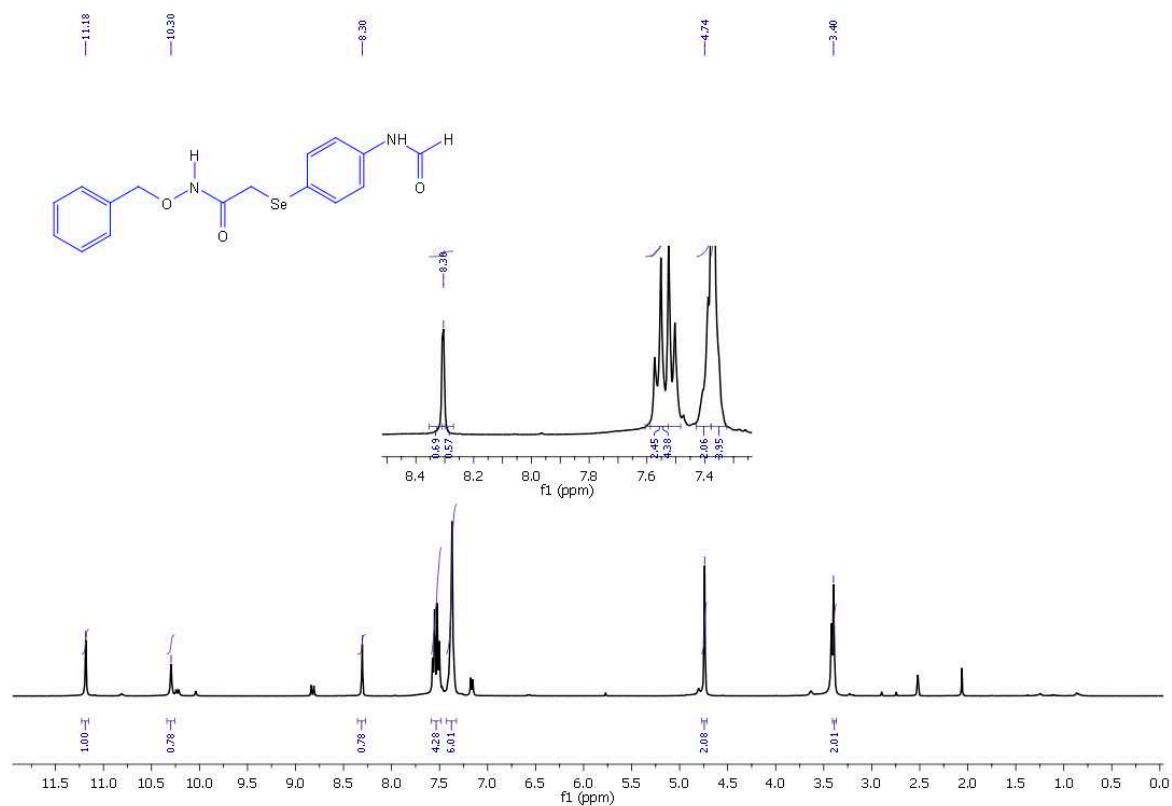

<sup>1</sup>H NMR chart of compound 10

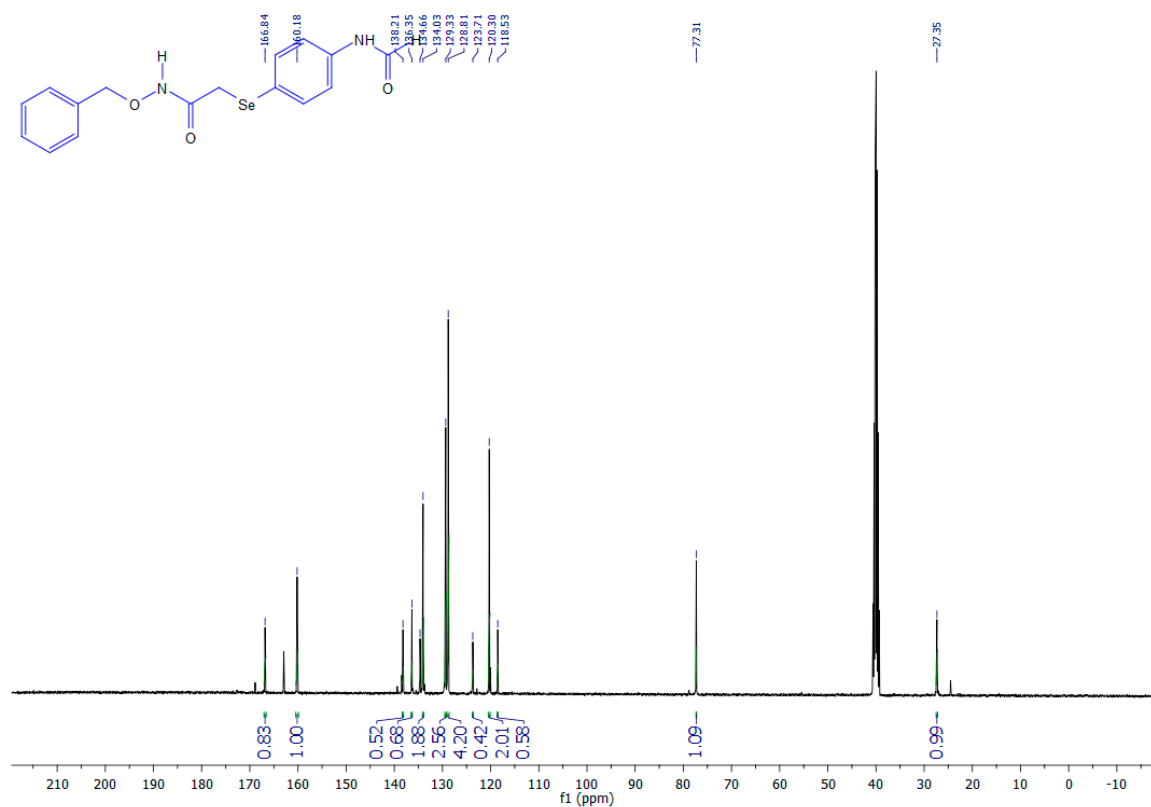

$^{13}\text{C}$ NMR chart of compound **10**

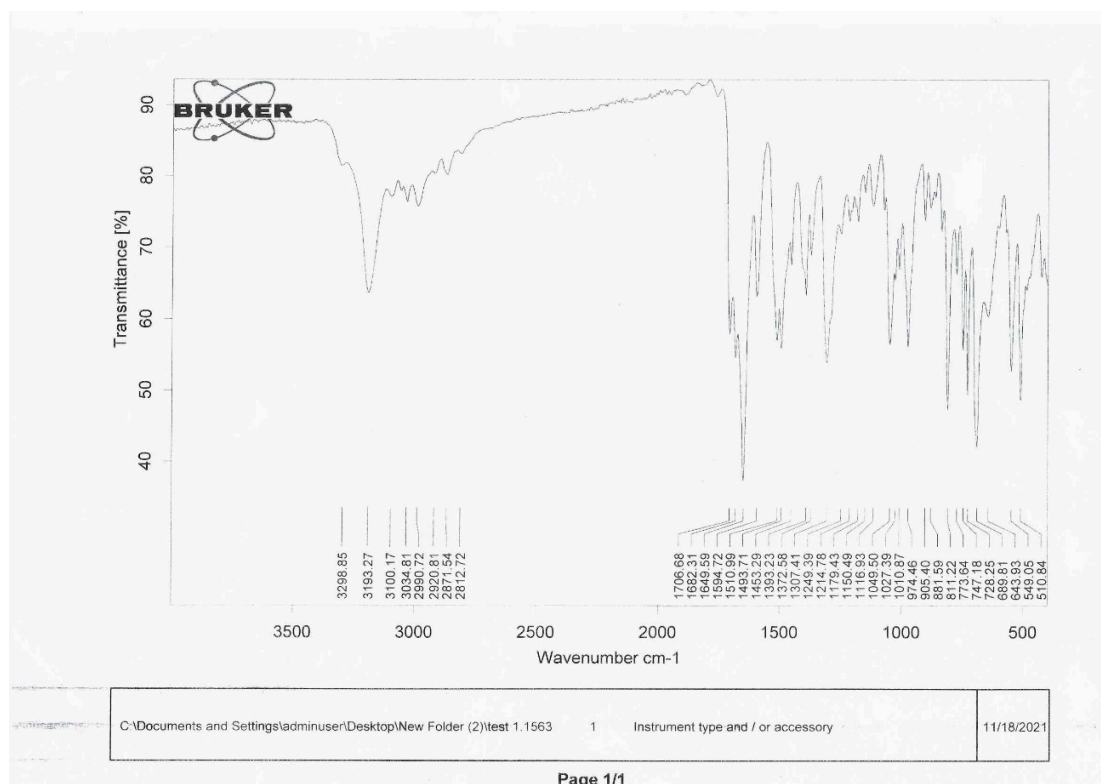

IR chart of compound of **10**

# Cairo University Micro Analytical Center

## DI Analysis Shimadzu Qp-2010 Plus

Sample Information  
 Analyzed by : Dr. Mai Younis  
 Analyzed : 06/01/2007 06:39:34  
 Sample Name : J15  
 Sample ID :  
 Customer Name : Dr. Mohamed Soliman - Science - Cairo  
 Data File : C:\GCMSSolution\Data\Project1\U15.QGD  
 Org Data File : C:\GCMSSolution\Data\Project1\U15.QGD  
 Method File : C:\GCMSSolution\Data\Project1\High Temperature Op  
 Org Method File : C:\GCMSSolution\Data\Project1\High Temperature Op  
 Report File :  
 Tuning File : C:\GCMSSolution\System\Tune1\\_default.qgt  
 \$EndIf\$Modified by : Dr. Mai Younis  
 Modified : 06/01/2007 06:44:23

### Method

Analytical Line 1  
 IonSourceTemp : 250.00 °C  
 [MS Table]  
 --Group 1 - Event 1--  
 Start Time : 0.00min  
 End Time : 10.00min  
 ACQ Mode : Scan  
 Event Time : 0.50sec  
 Scan Speed : 1000  
 Start m/z : 50.00  
 End m/z : 510.00  
 Electron Voltage : 70 eV  
 Ionization Mode : EI

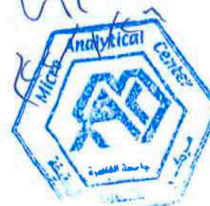

C:\GCMSSolution\Data\Project1\U15.QGD

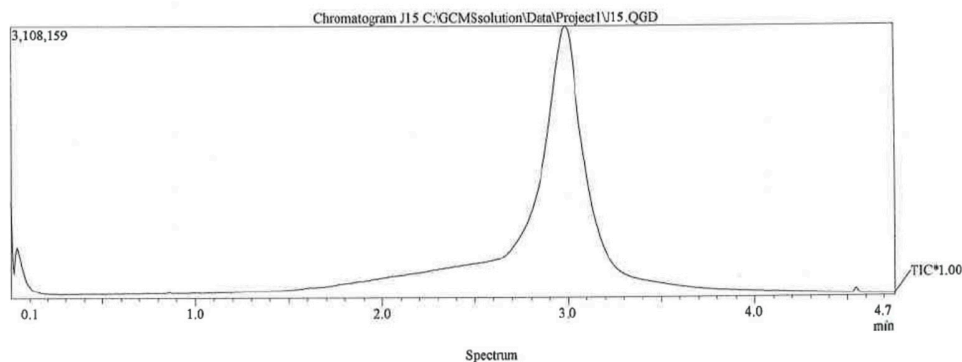

Line#:1 R.Time:3.0(Scan#:362)  
 MassPeaks:313(Peak Elimination m/z: 437.40, 455.40)  
 RawMode:Single 3.0(362) BasePeak:91(701185)  
 BG Mode:None Group 1 - Event 1

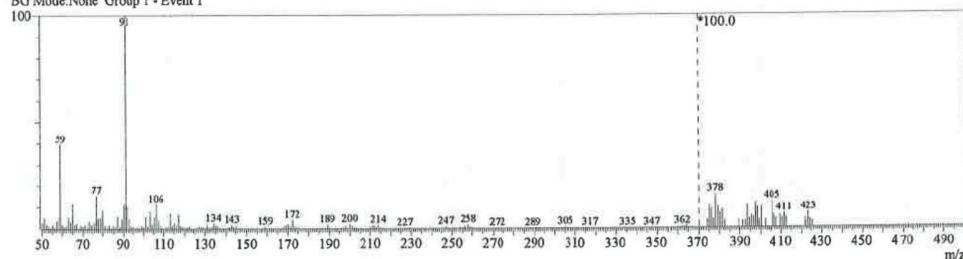

### Mass Table

Line#:1 R.Time:3.0(Scan#:362)

MassPeaks:313(Peak Elimination m/z: 437.40, 455.40)

RawMode:Single 3.0(362) BasePeak:91(701185)

BG Mode:None Group 1 - Event 1

| # | m/z   | Abs. In | Rel. Int. | # | m/z   | Abs. In | Rel. Int. | # | m/z   | Abs. In | Rel. Int. |
|---|-------|---------|-----------|---|-------|---------|-----------|---|-------|---------|-----------|
| 1 | 50.05 | 18306   | 2.61      | 4 | 53.05 | 9508    | 1.36      | 7 | 56.05 | 5385    | 0.77      |
| 2 | 51.00 | 35108   | 5.01      | 5 | 54.10 | 4943    | 0.70      | 8 | 57.05 | 27181   | 3.88      |
| 3 | 52.05 | 14886   | 2.12      | 6 | 55.05 | 11963   | 1.71      | 9 | 58.05 | 36337   | 5.18      |



| #  | m/z    | Abs. In | Rel. Int. | #   | m/z    | Abs. In | Rel. Int. | #   | m/z    | Abs. In | Rel. Int. |
|----|--------|---------|-----------|-----|--------|---------|-----------|-----|--------|---------|-----------|
| 10 | 59.05  | 277185  | 39.53     | 79  | 128.20 | 4665    | 0.67      | 148 | 197.05 | 3342    | 0.48      |
| 11 | 60.00  | 13026   | 1.86      | 80  | 129.20 | 5682    | 0.81      | 149 | 198.00 | 7778    | 1.11      |
| 12 | 61.05  | 6217    | 0.89      | 81  | 130.20 | 3086    | 0.44      | 150 | 199.05 | 2393    | 0.34      |
| 13 | 62.05  | 10649   | 1.52      | 82  | 131.15 | 12803   | 1.83      | 151 | 200.05 | 14081   | 2.01      |
| 14 | 63.05  | 36737   | 5.24      | 83  | 132.15 | 4696    | 0.67      | 152 | 201.15 | 7510    | 1.07      |
| 15 | 64.05  | 21412   | 3.05      | 84  | 133.25 | 5619    | 0.80      | 153 | 202.10 | 3604    | 0.51      |
| 16 | 65.05  | 80550   | 11.49     | 85  | 134.20 | 16919   | 2.41      | 154 | 203.15 | 2020    | 0.29      |
| 17 | 66.05  | 12945   | 1.85      | 86  | 135.20 | 10226   | 1.46      | 155 | 204.15 | 654     | 0.09      |
| 18 | 67.00  | 17186   | 2.45      | 87  | 136.20 | 8598    | 1.23      | 156 | 205.20 | 498     | 0.07      |
| 19 | 68.05  | 2987    | 0.43      | 88  | 137.15 | 3534    | 0.50      | 157 | 207.20 | 298     | 0.04      |
| 20 | 69.05  | 11276   | 1.61      | 89  | 138.10 | 1094    | 0.16      | 158 | 208.15 | 385     | 0.05      |
| 21 | 70.05  | 5218    | 0.74      | 90  | 139.15 | 2197    | 0.31      | 159 | 209.15 | 743     | 0.11      |
| 22 | 71.00  | 12086   | 1.72      | 91  | 140.10 | 1846    | 0.26      | 160 | 210.15 | 3949    | 0.56      |
| 23 | 72.05  | 4991    | 0.71      | 92  | 141.10 | 4375    | 0.62      | 161 | 211.15 | 9729    | 1.39      |
| 24 | 73.05  | 24750   | 3.53      | 93  | 142.15 | 3968    | 0.57      | 162 | 212.10 | 9746    | 1.39      |
| 25 | 74.05  | 13753   | 1.96      | 94  | 143.10 | 11502   | 1.64      | 163 | 213.15 | 4324    | 0.62      |
| 26 | 75.05  | 13118   | 1.87      | 95  | 144.10 | 5322    | 0.76      | 164 | 214.05 | 10691   | 1.52      |
| 27 | 76.15  | 18283   | 2.61      | 96  | 145.10 | 8807    | 1.26      | 165 | 215.10 | 2289    | 0.33      |
| 28 | 77.05  | 107829  | 15.38     | 97  | 146.10 | 2105    | 0.30      | 166 | 216.05 | 2100    | 0.30      |
| 29 | 78.05  | 32785   | 4.68      | 98  | 147.10 | 2425    | 0.35      | 167 | 217.15 | 1409    | 0.20      |
| 30 | 79.05  | 34505   | 4.92      | 99  | 148.10 | 1932    | 0.28      | 168 | 218.10 | 412     | 0.06      |
| 31 | 80.05  | 61428   | 8.76      | 100 | 149.15 | 927     | 0.13      | 169 | 219.20 | 799     | 0.11      |
| 32 | 81.05  | 10306   | 1.47      | 101 | 150.25 | 663     | 0.09      | 170 | 220.20 | 225     | 0.03      |
| 33 | 82.15  | 2853    | 0.41      | 102 | 151.20 | 2362    | 0.34      | 171 | 221.20 | 225     | 0.03      |
| 34 | 83.05  | 12014   | 1.71      | 103 | 152.15 | 1897    | 0.27      | 172 | 224.15 | 728     | 0.10      |
| 35 | 84.15  | 3523    | 0.50      | 104 | 153.15 | 1488    | 0.21      | 173 | 225.15 | 1328    | 0.19      |
| 36 | 85.10  | 10122   | 1.44      | 105 | 154.15 | 925     | 0.13      | 174 | 226.15 | 1083    | 0.15      |
| 37 | 86.15  | 6782    | 0.97      | 106 | 155.15 | 2770    | 0.40      | 175 | 227.15 | 1616    | 0.23      |
| 38 | 87.05  | 41037   | 5.85      | 107 | 156.15 | 1100    | 0.16      | 176 | 228.15 | 1472    | 0.21      |
| 39 | 88.15  | 5806    | 0.83      | 108 | 157.15 | 1736    | 0.25      | 177 | 229.20 | 1295    | 0.18      |
| 40 | 89.10  | 31284   | 4.46      | 109 | 158.25 | 1263    | 0.18      | 178 | 230.15 | 1025    | 0.15      |
| 41 | 90.15  | 78211   | 11.15     | 110 | 159.20 | 6394    | 0.91      | 179 | 231.15 | 896     | 0.13      |
| 42 | 91.10  | 701185  | 100.00    | 111 | 160.25 | 917     | 0.13      | 180 | 232.05 | 314     | 0.04      |
| 43 | 92.10  | 71798   | 10.24     | 112 | 161.20 | 1492    | 0.21      | 181 | 233.20 | 660     | 0.09      |
| 44 | 93.05  | 32658   | 4.66      | 113 | 162.15 | 984     | 0.14      | 182 | 234.30 | 311     | 0.04      |
| 45 | 94.05  | 9575    | 1.37      | 114 | 163.20 | 511     | 0.07      | 183 | 235.15 | 440     | 0.06      |
| 46 | 95.05  | 8204    | 1.17      | 115 | 164.05 | 304     | 0.04      | 184 | 236.20 | 212     | 0.03      |
| 47 | 96.10  | 2594    | 0.37      | 116 | 165.05 | 813     | 0.12      | 185 | 237.20 | 204     | 0.03      |
| 48 | 97.10  | 6538    | 0.93      | 117 | 166.05 | 1065    | 0.15      | 186 | 238.15 | 380     | 0.05      |
| 49 | 98.15  | 2925    | 0.42      | 118 | 167.05 | 1810    | 0.26      | 187 | 239.20 | 908     | 0.13      |
| 50 | 99.10  | 8266    | 1.18      | 119 | 168.05 | 6531    | 0.93      | 188 | 240.15 | 548     | 0.08      |
| 51 | 100.15 | 6500    | 0.93      | 120 | 169.05 | 10292   | 1.47      | 189 | 241.15 | 735     | 0.10      |
| 52 | 101.10 | 38386   | 5.47      | 121 | 170.05 | 15292   | 2.18      | 190 | 242.20 | 950     | 0.14      |
| 53 | 102.15 | 8334    | 1.19      | 122 | 171.15 | 8248    | 1.18      | 191 | 243.00 | 438     | 0.06      |
| 54 | 103.15 | 55677   | 7.94      | 123 | 172.05 | 27835   | 3.97      | 192 | 244.15 | 298     | 0.04      |
| 55 | 104.15 | 13353   | 1.90      | 124 | 173.10 | 7732    | 1.10      | 193 | 245.20 | 983     | 0.14      |
| 56 | 105.15 | 36003   | 5.13      | 125 | 174.05 | 5518    | 0.79      | 194 | 246.35 | 617     | 0.09      |
| 57 | 106.15 | 79678   | 11.36     | 126 | 175.20 | 4231    | 0.60      | 195 | 247.30 | 5943    | 0.85      |
| 58 | 107.15 | 25892   | 3.69      | 127 | 176.20 | 1100    | 0.16      | 196 | 248.20 | 1900    | 0.27      |
| 59 | 108.15 | 12012   | 1.71      | 128 | 177.20 | 1340    | 0.19      | 197 | 249.15 | 441     | 0.06      |
| 60 | 109.15 | 3212    | 0.46      | 129 | 178.20 | 316     | 0.05      | 198 | 251.15 | 428     | 0.06      |
| 61 | 110.15 | 1564    | 0.22      | 130 | 179.10 | 246     | 0.04      | 199 | 252.10 | 753     | 0.11      |
| 62 | 111.15 | 6034    | 0.86      | 131 | 180.15 | 574     | 0.08      | 200 | 253.15 | 677     | 0.10      |
| 63 | 112.25 | 6235    | 0.89      | 132 | 181.15 | 782     | 0.11      | 201 | 254.10 | 3342    | 0.48      |
| 64 | 113.15 | 49721   | 7.09      | 133 | 182.15 | 1297    | 0.18      | 202 | 255.15 | 2531    | 0.36      |
| 65 | 114.15 | 10159   | 1.45      | 134 | 183.15 | 1889    | 0.27      | 203 | 256.10 | 7935    | 1.13      |
| 66 | 115.15 | 17024   | 2.43      | 135 | 184.10 | 1881    | 0.27      | 204 | 257.15 | 1989    | 0.28      |
| 67 | 116.25 | 9691    | 1.38      | 136 | 185.15 | 1969    | 0.28      | 205 | 258.10 | 12047   | 1.72      |
| 68 | 117.20 | 47164   | 6.73      | 137 | 186.10 | 2553    | 0.36      | 206 | 259.25 | 6053    | 0.86      |
| 69 | 118.10 | 9286    | 1.32      | 138 | 187.15 | 2322    | 0.33      | 207 | 260.15 | 3195    | 0.46      |
| 70 | 119.10 | 6382    | 0.91      | 139 | 188.25 | 1370    | 0.20      | 208 | 261.20 | 927     | 0.13      |
| 71 | 120.15 | 3172    | 0.45      | 140 | 189.20 | 12263   | 1.75      | 209 | 262.40 | 513     | 0.07      |
| 72 | 121.20 | 4009    | 0.57      | 141 | 190.15 | 2145    | 0.31      | 210 | 263.35 | 485     | 0.07      |
| 73 | 122.15 | 6660    | 0.95      | 142 | 191.20 | 766     | 0.11      | 211 | 264.35 | 442     | 0.06      |
| 74 | 123.15 | 1954    | 0.28      | 143 | 192.25 | 316     | 0.05      | 212 | 265.30 | 562     | 0.08      |
| 75 | 124.15 | 714     | 0.10      | 144 | 193.25 | 2281    | 0.33      | 213 | 266.30 | 214     | 0.03      |
| 76 | 125.20 | 1495    | 0.21      | 145 | 194.10 | 905     | 0.13      | 214 | 268.05 | 363     | 0.05      |
| 77 | 126.25 | 2144    | 0.31      | 146 | 195.05 | 520     | 0.07      | 215 | 269.25 | 391     | 0.06      |
| 78 | 127.20 | 9042    | 1.29      | 147 | 196.05 | 3282    | 0.47      | 216 | 270.25 | 776     | 0.11      |

| #   | m/z    | Abs. In | Rel. Int. | #   | m/z    | Abs. In | Rel. Int. | #   | m/z    | Abs. In | Rel. Int. |
|-----|--------|---------|-----------|-----|--------|---------|-----------|-----|--------|---------|-----------|
| 217 | 271.25 | 754     | 0.11      | 250 | 321.30 | 521     | 0.07      | 283 | 376.35 | 613     | 0.09      |
| 218 | 272.15 | 1314    | 0.19      | 251 | 323.30 | 593     | 0.08      | 284 | 377.30 | 273     | 0.04      |
| 219 | 273.25 | 723     | 0.10      | 252 | 329.30 | 220     | 0.03      | 285 | 378.30 | 1097    | 0.16      |
| 220 | 274.15 | 465     | 0.07      | 253 | 331.30 | 476     | 0.07      | 286 | 379.40 | 678     | 0.10      |
| 221 | 275.20 | 356     | 0.05      | 254 | 332.30 | 209     | 0.03      | 287 | 380.40 | 484     | 0.07      |
| 222 | 276.20 | 276     | 0.04      | 255 | 333.45 | 408     | 0.06      | 288 | 381.50 | 585     | 0.08      |
| 223 | 277.30 | 554     | 0.08      | 256 | 334.50 | 286     | 0.04      | 289 | 382.50 | 222     | 0.03      |
| 224 | 285.30 | 580     | 0.08      | 257 | 335.50 | 602     | 0.09      | 290 | 389.50 | 250     | 0.04      |
| 225 | 286.35 | 372     | 0.05      | 258 | 336.50 | 238     | 0.03      | 291 | 391.50 | 207     | 0.03      |
| 226 | 287.30 | 478     | 0.07      | 259 | 337.50 | 201     | 0.03      | 292 | 392.60 | 217     | 0.03      |
| 227 | 288.30 | 394     | 0.06      | 260 | 339.40 | 582     | 0.08      | 293 | 393.60 | 735     | 0.10      |
| 228 | 289.25 | 1146    | 0.16      | 261 | 341.40 | 252     | 0.04      | 294 | 394.60 | 290     | 0.04      |
| 229 | 290.25 | 484     | 0.07      | 262 | 343.40 | 212     | 0.03      | 295 | 395.55 | 387     | 0.06      |
| 230 | 291.25 | 933     | 0.13      | 263 | 346.40 | 218     | 0.03      | 296 | 396.50 | 324     | 0.05      |
| 231 | 292.20 | 322     | 0.05      | 264 | 347.35 | 1144    | 0.16      | 297 | 397.50 | 818     | 0.12      |
| 232 | 293.25 | 414     | 0.06      | 265 | 348.35 | 355     | 0.05      | 298 | 398.45 | 644     | 0.09      |
| 233 | 299.30 | 268     | 0.04      | 266 | 349.25 | 481     | 0.07      | 299 | 399.20 | 255     | 0.04      |
| 234 | 300.30 | 297     | 0.04      | 267 | 351.30 | 292     | 0.04      | 300 | 400.20 | 676     | 0.10      |
| 235 | 301.40 | 378     | 0.05      | 268 | 353.30 | 268     | 0.04      | 301 | 402.20 | 255     | 0.04      |
| 236 | 302.35 | 448     | 0.06      | 269 | 355.30 | 250     | 0.04      | 302 | 405.45 | 851     | 0.12      |
| 237 | 303.35 | 950     | 0.14      | 270 | 358.30 | 206     | 0.03      | 303 | 406.50 | 409     | 0.06      |
| 238 | 304.35 | 948     | 0.14      | 271 | 359.25 | 346     | 0.05      | 304 | 407.50 | 302     | 0.04      |
| 239 | 305.35 | 4728    | 0.67      | 272 | 360.25 | 2084    | 0.30      | 305 | 409.50 | 404     | 0.06      |
| 240 | 306.30 | 1756    | 0.25      | 273 | 361.25 | 2545    | 0.36      | 306 | 410.50 | 303     | 0.04      |
| 241 | 307.25 | 488     | 0.07      | 274 | 362.20 | 4982    | 0.71      | 307 | 411.55 | 459     | 0.07      |
| 242 | 313.45 | 782     | 0.11      | 275 | 363.25 | 2971    | 0.42      | 308 | 412.55 | 313     | 0.04      |
| 243 | 314.50 | 314     | 0.04      | 276 | 364.25 | 10056   | 1.43      | 309 | 421.60 | 298     | 0.04      |
| 244 | 315.50 | 222     | 0.03      | 277 | 365.15 | 2555    | 0.36      | 310 | 422.40 | 202     | 0.03      |
| 245 | 316.35 | 407     | 0.06      | 278 | 366.20 | 1932    | 0.28      | 311 | 423.45 | 478     | 0.07      |
| 246 | 317.35 | 1606    | 0.23      | 279 | 367.30 | 900     | 0.13      | 312 | 424.40 | 265     | 0.04      |
| 247 | 318.15 | 573     | 0.08      | 280 | 368.30 | 241     | 0.03      | 313 | 425.40 | 207     | 0.03      |
| 248 | 319.15 | 451     | 0.06      | 281 | 374.40 | 263     | 0.04      |     |        |         |           |
| 249 | 320.10 | 247     | 0.04      | 282 | 375.45 | 725     | 0.10      |     |        |         |           |

*Synthesis of 4-((4-((2-((benzyloxy)amino)-2-oxoethyl)selenanyl)phenyl)amino)-4-oxobutanoic acid (11)*

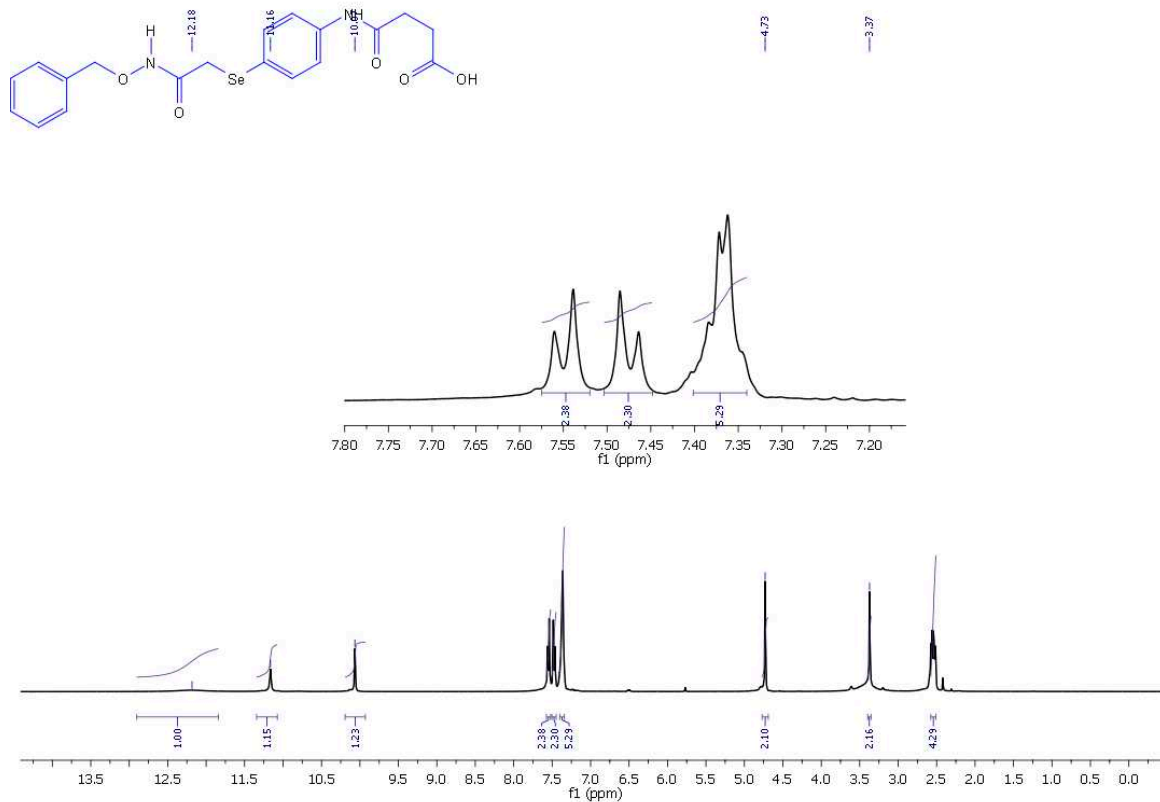

<sup>1</sup>H NMR chart of compound 11

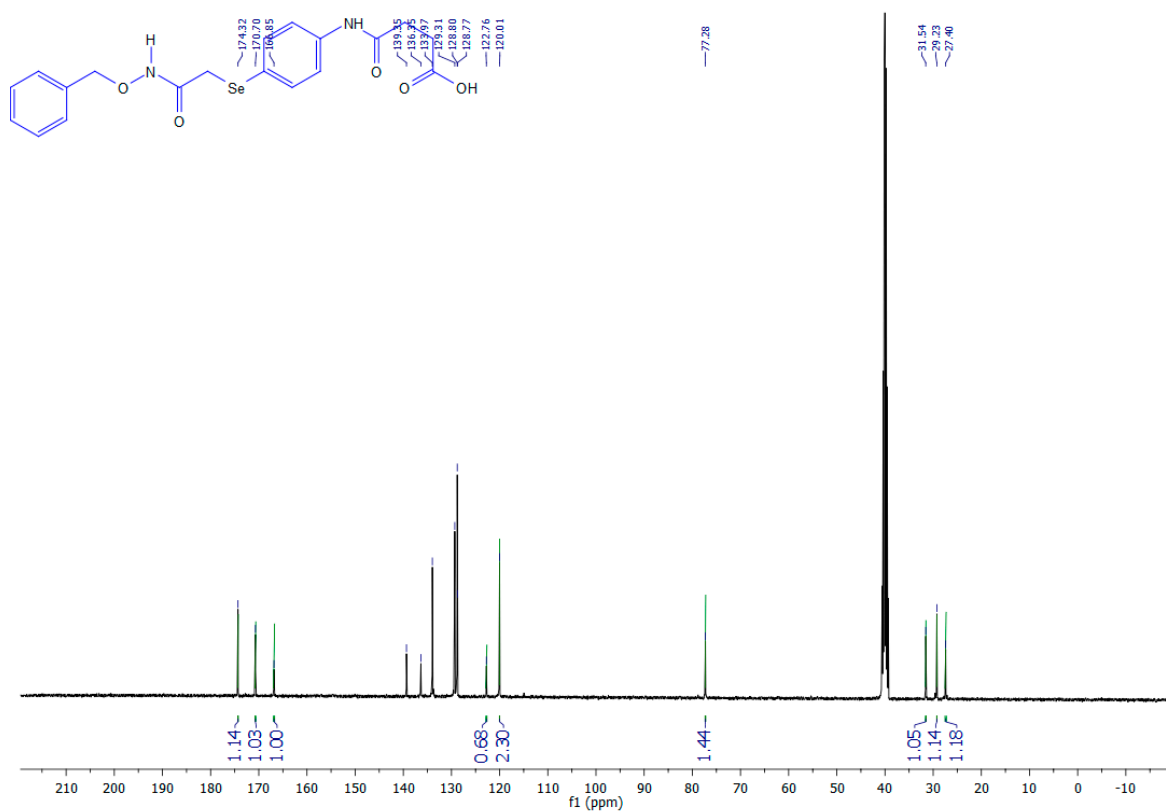

<sup>1</sup>H NMR chart of compound 11

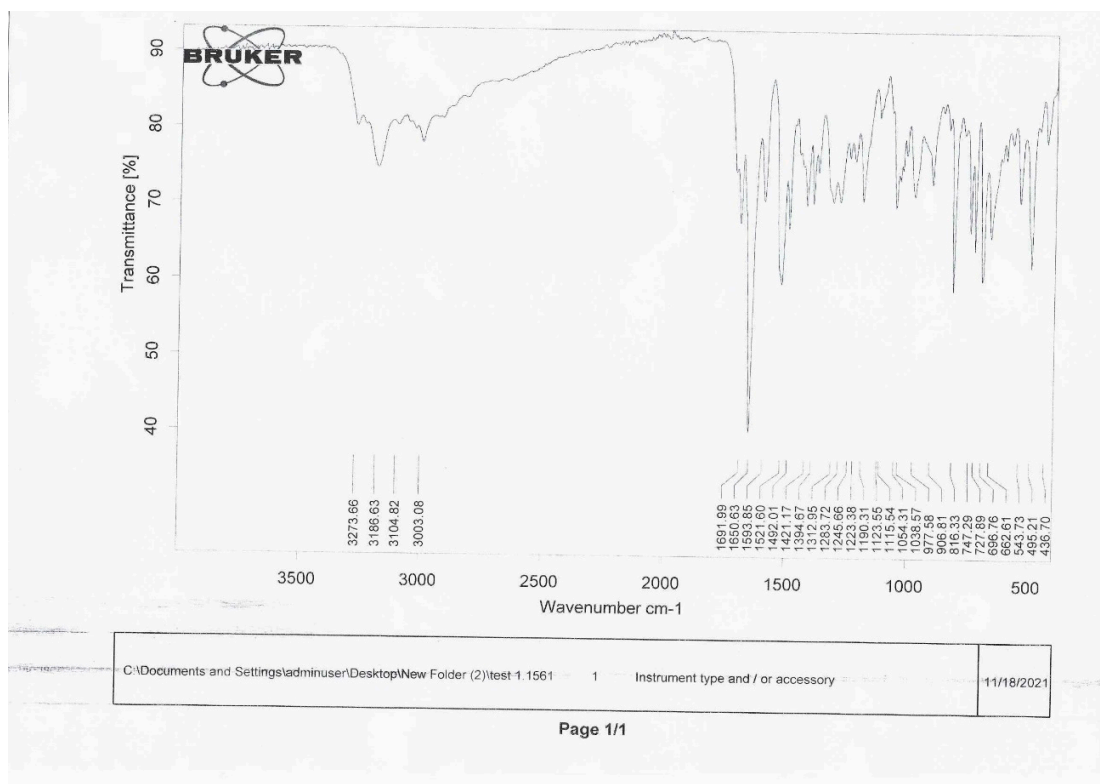

IR chart of compound 11

# Cairo University Micro Analytical Center

## DI Analysis Shimadzu Qp-2010 Plus

Sample Information  
 Analyzed by : Dr. Mai Younis  
 Analyzed : 03/01/2007 09:00:00  
 Sample Name : J10  
 Sample ID :  
 Customer Name : Dr. Mohamed Soliman - Science - Cairo  
 Data File : C:\GCMSsolution\Data\Project1\J10.QGD  
 Org Data File : C:\GCMSsolution\Data\Project1\J10.QGD  
 Method File : C:\GCMSsolution\Data\Project1\High Temperature Op  
 Org Method File : C:\GCMSsolution\Data\Project1\High Temperature Op  
 Report File :  
 Tuning File : C:\GCMSsolution\System\Tune1\default.qgt  
 \$EndIf\$Modified by : Dr. Mai Younis  
 Modified : 03/01/2007 09:05:28

Method  
 Analytical Line 1  
 IonSourceTemp : 250.00 °C  
 [MS Table]  
 --Group 1 - Event 1--  
 Start Time : 0.00min  
 End Time : 10.00min  
 ACQ Mode : Scan  
 Event Time : 0.50sec  
 Scan Speed : 1000  
 Start m/z : 50.00  
 End m/z : 510.00  
 Electron Voltage : 70 eV  
 Ionization Mode : EI

C:\GCMSsolution\Data\Project1\J10.QGD

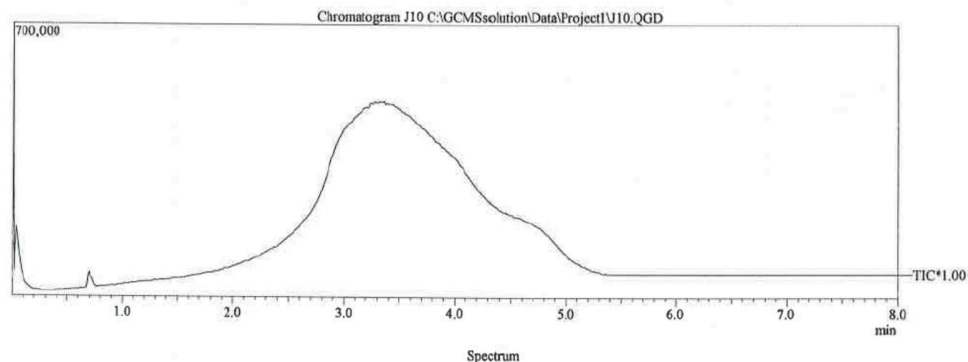

Line#:1 R.Time:3.8(Scan#:457)  
 MassPeaks:181  
 RawMode:Single 3.8(457) BasePeak:91(115204)  
 BG Mode:None Group 1 - Event 1

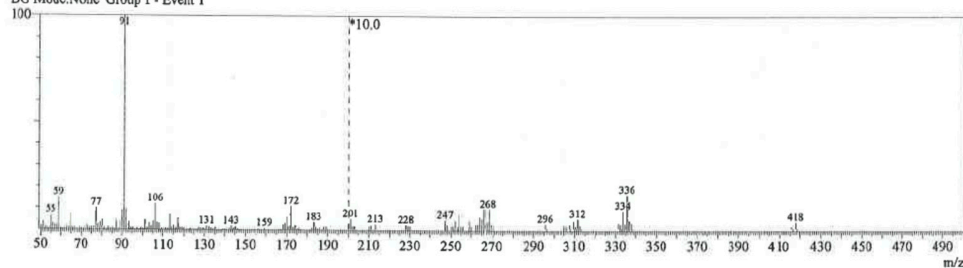

Mass Table  
 Line#:1 R.Time:3.8(Scan#:457)  
 MassPeaks:181  
 RawMode:Single 3.8(457) BasePeak:91(115204)  
 BG Mode:None Group 1 - Event 1

| # | m/z   | Abs. In | Rel. Int. | # | m/z   | Abs. In | Rel. Int. | # | m/z   | Abs. In | Rel. Int. |
|---|-------|---------|-----------|---|-------|---------|-----------|---|-------|---------|-----------|
| 1 | 50.05 | 1945    | 1.69      | 4 | 53.05 | 1292    | 1.12      | 7 | 56.00 | 3238    | 2.81      |
| 2 | 51.00 | 4190    | 3.64      | 5 | 54.05 | 1117    | 0.97      | 8 | 57.05 | 2271    | 1.97      |
| 3 | 52.05 | 1636    | 1.42      | 6 | 55.00 | 7308    | 6.34      | 9 | 58.05 | 2379    | 2.07      |

| #  | m/z    | Abs. In | Rel. Int. | #   | m/z    | Abs. In | Rel. Int. | #   | m/z    | Abs. In | Rel. Int. |
|----|--------|---------|-----------|-----|--------|---------|-----------|-----|--------|---------|-----------|
| 10 | 59.00  | 16964   | 14.73     | 68  | 117.15 | 6087    | 5.28      | 126 | 186.00 | 1239    | 1.08      |
| 11 | 60.00  | 849     | 0.74      | 69  | 118.05 | 1331    | 1.16      | 127 | 187.10 | 540     | 0.47      |
| 12 | 61.00  | 436     | 0.38      | 70  | 119.10 | 1262    | 1.10      | 128 | 188.05 | 1709    | 1.48      |
| 13 | 62.05  | 769     | 0.67      | 71  | 120.10 | 1086    | 0.94      | 129 | 189.15 | 1769    | 1.54      |
| 14 | 63.05  | 2693    | 2.34      | 72  | 121.15 | 360     | 0.31      | 130 | 190.05 | 773     | 0.67      |
| 15 | 64.05  | 1718    | 1.49      | 73  | 122.10 | 246     | 0.21      | 131 | 191.00 | 321     | 0.28      |
| 16 | 65.00  | 8239    | 7.15      | 74  | 123.10 | 633     | 0.55      | 132 | 193.00 | 209     | 0.18      |
| 17 | 66.05  | 1119    | 0.97      | 75  | 125.10 | 281     | 0.24      | 133 | 196.00 | 231     | 0.20      |
| 18 | 67.00  | 1436    | 1.25      | 76  | 126.25 | 325     | 0.28      | 134 | 198.00 | 418     | 0.36      |
| 19 | 68.00  | 274     | 0.24      | 77  | 127.20 | 1298    | 1.13      | 135 | 200.00 | 230     | 0.20      |
| 20 | 69.05  | 1175    | 1.02      | 78  | 128.15 | 883     | 0.77      | 136 | 201.10 | 598     | 0.52      |
| 21 | 70.05  | 615     | 0.53      | 79  | 129.15 | 915     | 0.79      | 137 | 202.10 | 210     | 0.18      |
| 22 | 71.05  | 1172    | 1.02      | 80  | 130.25 | 648     | 0.56      | 138 | 203.10 | 202     | 0.18      |
| 23 | 72.05  | 500     | 0.43      | 81  | 131.15 | 2109    | 1.83      | 139 | 210.10 | 207     | 0.18      |
| 24 | 73.05  | 2134    | 1.85      | 82  | 132.15 | 1716    | 1.49      | 140 | 211.10 | 226     | 0.20      |
| 25 | 74.05  | 1019    | 0.88      | 83  | 133.20 | 889     | 0.77      | 141 | 213.10 | 302     | 0.26      |
| 26 | 75.05  | 1291    | 1.12      | 84  | 134.15 | 605     | 0.53      | 142 | 228.10 | 263     | 0.23      |
| 27 | 76.05  | 1732    | 1.50      | 85  | 135.15 | 1346    | 1.17      | 143 | 229.10 | 212     | 0.18      |
| 28 | 77.05  | 11559   | 10.03     | 86  | 136.10 | 202     | 0.18      | 144 | 230.10 | 222     | 0.19      |
| 29 | 78.05  | 3103    | 2.69      | 87  | 139.20 | 382     | 0.33      | 145 | 247.20 | 534     | 0.46      |
| 30 | 79.05  | 3815    | 3.31      | 88  | 140.05 | 376     | 0.33      | 146 | 248.20 | 295     | 0.26      |
| 31 | 80.05  | 4986    | 4.33      | 89  | 141.05 | 691     | 0.60      | 147 | 250.20 | 238     | 0.21      |
| 32 | 81.05  | 1216    | 1.06      | 90  | 142.05 | 668     | 0.58      | 148 | 251.00 | 239     | 0.21      |
| 33 | 82.05  | 454     | 0.39      | 91  | 143.00 | 1937    | 1.68      | 149 | 251.95 | 486     | 0.42      |
| 34 | 83.10  | 1522    | 1.32      | 92  | 144.05 | 845     | 0.73      | 150 | 253.10 | 210     | 0.18      |
| 35 | 84.10  | 582     | 0.51      | 93  | 145.05 | 1680    | 1.46      | 151 | 254.10 | 846     | 0.73      |
| 36 | 85.10  | 1159    | 1.01      | 94  | 146.15 | 764     | 0.66      | 152 | 255.10 | 218     | 0.19      |
| 37 | 86.15  | 703     | 0.61      | 95  | 147.15 | 573     | 0.50      | 153 | 256.10 | 222     | 0.19      |
| 38 | 87.05  | 4634    | 4.02      | 96  | 148.20 | 258     | 0.22      | 154 | 259.20 | 506     | 0.44      |
| 39 | 88.15  | 749     | 0.65      | 97  | 149.20 | 242     | 0.21      | 155 | 260.20 | 236     | 0.20      |
| 40 | 89.15  | 4402    | 3.82      | 98  | 151.20 | 247     | 0.21      | 156 | 262.20 | 300     | 0.26      |
| 41 | 90.15  | 10221   | 8.87      | 99  | 153.10 | 356     | 0.31      | 157 | 263.10 | 329     | 0.29      |
| 42 | 91.05  | 115204  | 100.00    | 100 | 154.05 | 368     | 0.32      | 158 | 264.15 | 694     | 0.60      |
| 43 | 92.05  | 11047   | 9.59      | 101 | 155.10 | 348     | 0.30      | 159 | 265.15 | 589     | 0.51      |
| 44 | 93.05  | 4079    | 3.54      | 102 | 156.10 | 519     | 0.45      | 160 | 266.10 | 1119    | 0.97      |
| 45 | 94.05  | 1002    | 0.87      | 103 | 157.15 | 393     | 0.34      | 161 | 267.15 | 437     | 0.38      |
| 46 | 95.10  | 1118    | 0.97      | 104 | 158.10 | 351     | 0.30      | 162 | 268.10 | 1127    | 0.98      |
| 47 | 96.10  | 449     | 0.39      | 105 | 159.10 | 911     | 0.79      | 163 | 269.10 | 337     | 0.29      |
| 48 | 97.05  | 904     | 0.78      | 106 | 160.10 | 310     | 0.27      | 164 | 270.10 | 255     | 0.22      |
| 49 | 98.15  | 458     | 0.40      | 107 | 165.10 | 242     | 0.21      | 165 | 296.10 | 330     | 0.29      |
| 50 | 99.10  | 1004    | 0.87      | 108 | 166.05 | 539     | 0.47      | 166 | 305.10 | 279     | 0.24      |
| 51 | 100.15 | 865     | 0.75      | 109 | 167.05 | 580     | 0.50      | 167 | 306.10 | 233     | 0.20      |
| 52 | 101.10 | 5194    | 4.51      | 110 | 168.05 | 2882    | 2.50      | 168 | 308.10 | 305     | 0.26      |
| 53 | 102.15 | 981     | 0.85      | 111 | 169.05 | 3305    | 2.87      | 169 | 310.10 | 487     | 0.42      |
| 54 | 103.10 | 3543    | 3.08      | 112 | 170.00 | 6798    | 5.90      | 170 | 311.10 | 220     | 0.19      |
| 55 | 104.15 | 1784    | 1.55      | 113 | 171.05 | 1859    | 1.61      | 171 | 312.10 | 607     | 0.53      |
| 56 | 105.10 | 4430    | 3.85      | 114 | 172.00 | 12639   | 10.97     | 172 | 313.10 | 270     | 0.23      |
| 57 | 106.10 | 14001   | 12.15     | 115 | 172.95 | 1539    | 1.34      | 173 | 332.15 | 399     | 0.35      |
| 58 | 107.10 | 3910    | 3.39      | 116 | 174.00 | 2425    | 2.10      | 174 | 333.15 | 338     | 0.29      |
| 59 | 108.10 | 3198    | 2.78      | 117 | 175.10 | 649     | 0.56      | 175 | 334.15 | 1050    | 0.91      |
| 60 | 109.10 | 834     | 0.72      | 118 | 176.10 | 1036    | 0.90      | 176 | 335.25 | 356     | 0.31      |
| 61 | 110.15 | 298     | 0.26      | 119 | 177.10 | 318     | 0.28      | 177 | 336.15 | 1897    | 1.65      |
| 62 | 111.05 | 868     | 0.75      | 120 | 180.10 | 318     | 0.28      | 178 | 337.10 | 524     | 0.45      |
| 63 | 112.15 | 789     | 0.68      | 121 | 181.15 | 378     | 0.33      | 179 | 338.20 | 398     | 0.35      |
| 64 | 113.10 | 7921    | 6.88      | 122 | 182.10 | 1002    | 0.87      | 180 | 416.20 | 215     | 0.19      |
| 65 | 114.10 | 1380    | 1.20      | 123 | 183.10 | 4110    | 3.57      | 181 | 418.25 | 456     | 0.40      |
| 66 | 115.10 | 2383    | 2.07      | 124 | 184.05 | 1558    | 1.35      |     |        |         |           |
| 67 | 116.15 | 1146    | 0.99      | 125 | 185.05 | 643     | 0.56      |     |        |         |           |

## Mass chart of compound 11

*Synthesis of 4-((4-((2-((benzyloxy)amino)-2-oxoethyl)selenanyl)phenyl)amino)-4-oxobut-2-enoic acid (12)*

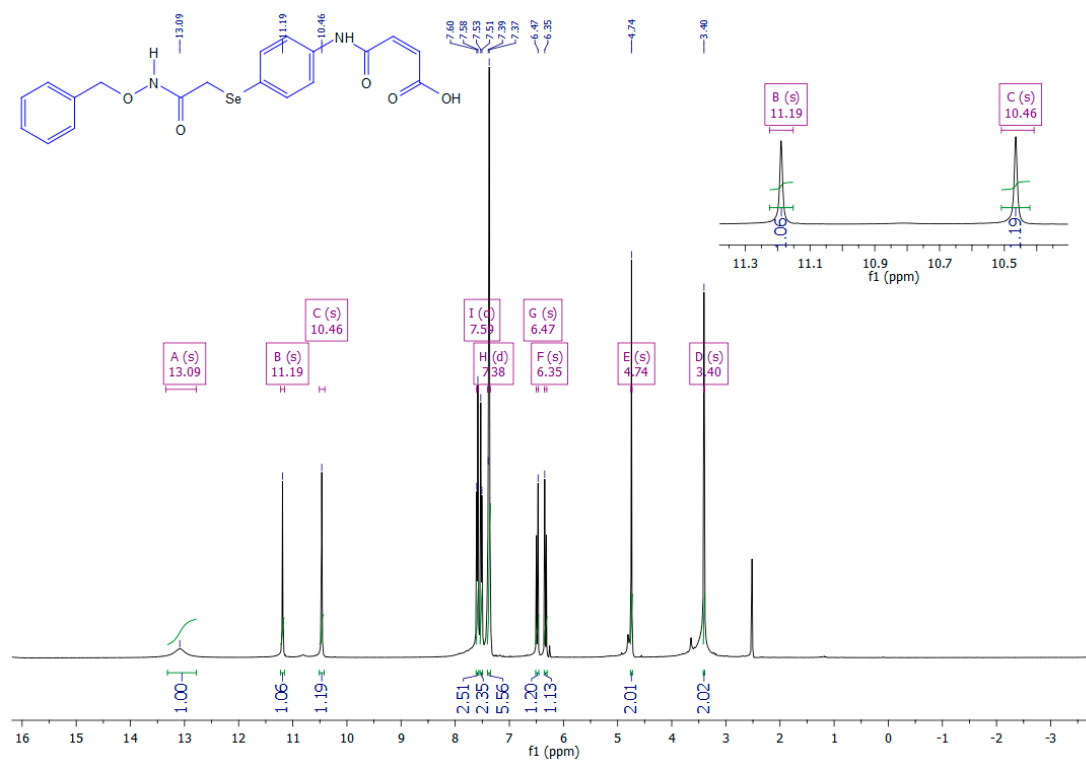

<sup>1</sup>H NMR chart of compound 12



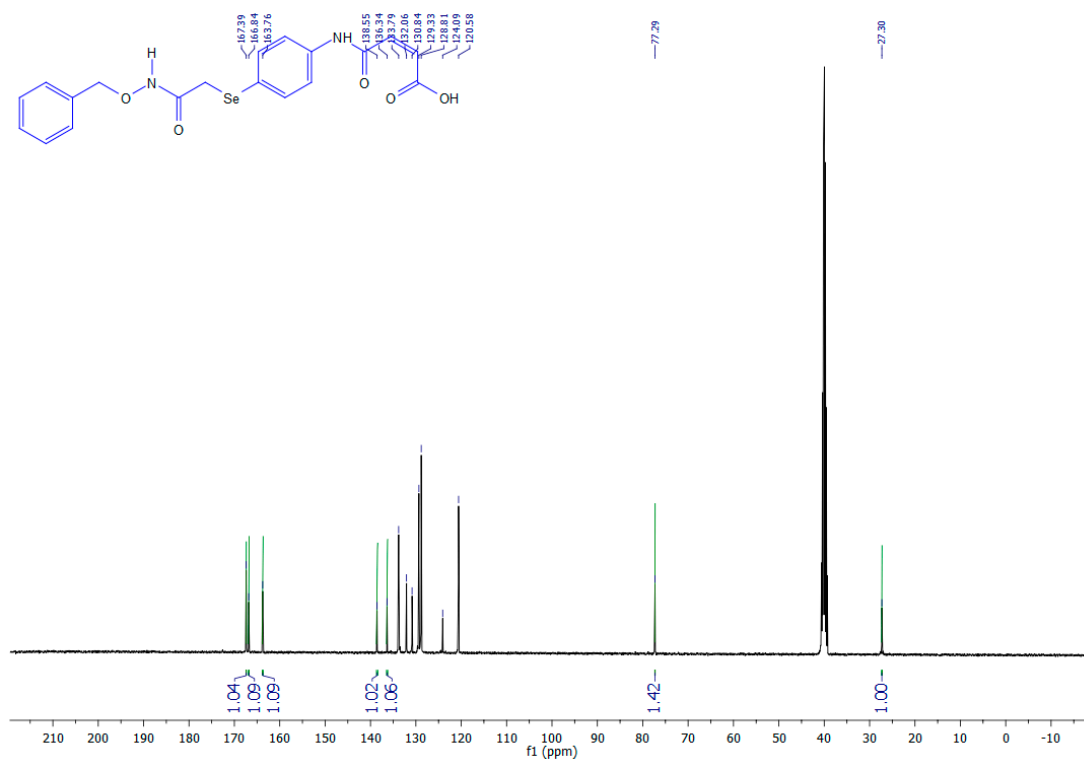

<sup>13</sup>CNMR chart of compound 12

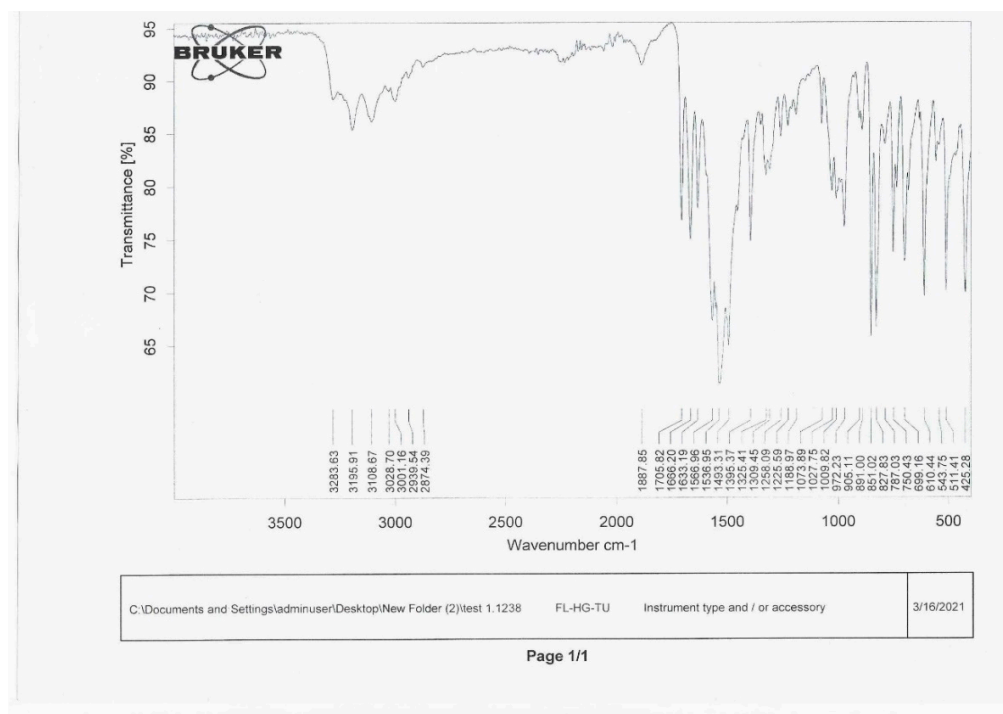

IR chart of compound 12

# Cairo University Micro Analytical Center

## DI Analysis Shimadzu Qp-2010 Plus

Sample Information  
 Analyzed by : Dr. Mai Younis  
 Analyzed : 03/01/2007 09:07:47  
 Sample Name : J6  
 Sample ID :  
 Customer Name : Dr. Mohamed Soliman - Science - Cairo  
 Data File : C:\GCMSsolution\Data\Project1\U6.QGD  
 Org Data File : C:\GCMSsolution\Data\Project1\U6.QGD  
 Method File : C:\GCMSsolution\Data\Project1\High Temperature Op  
 Org Method File : C:\GCMSsolution\Data\Project1\High Temperature Op  
 Report File :  
 Tuning File : C:\GCMSsolution\System\Tune1\default.qgt  
 \$EndIf\$ Modified by : Dr. Mai Younis  
 Modified : 03/01/2007 09:12:26

## Method

Analytical Line 1  
 IonSourceTemp : 250.00 °C  
 [MS Table]  
 --Group 1 - Event 1--  
 Start Time : 0.00min  
 End Time : 10.00min  
 ACQ Mode : Scan  
 Event Time : 0.50sec  
 Scan Speed : 1000  
 Start m/z : 50.00  
 End m/z : 510.00

Electron Voltage : 70 eV  
 Ionization Mode : EI

C:\GCMSsolution\Data\Project1\U6.QGD

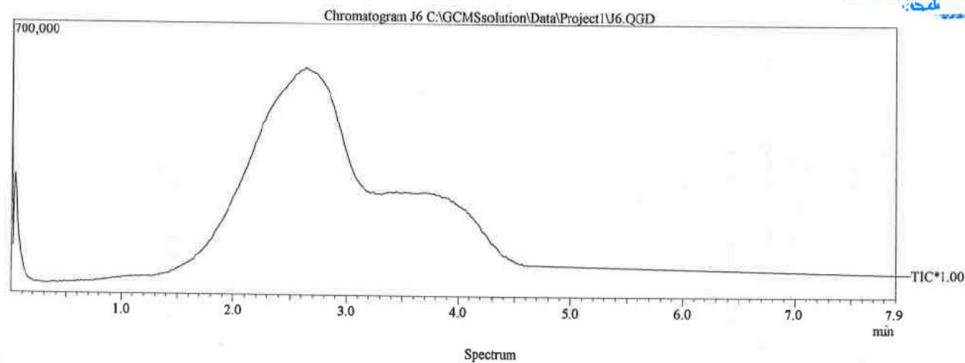

Line#:1 R.Time:2.6(Scan#:318)  
 MassPeaks:155  
 RawMode:Single 2.6(318) BasePeak:91(160524)  
 BG Mode:None Group 1 - Event 1

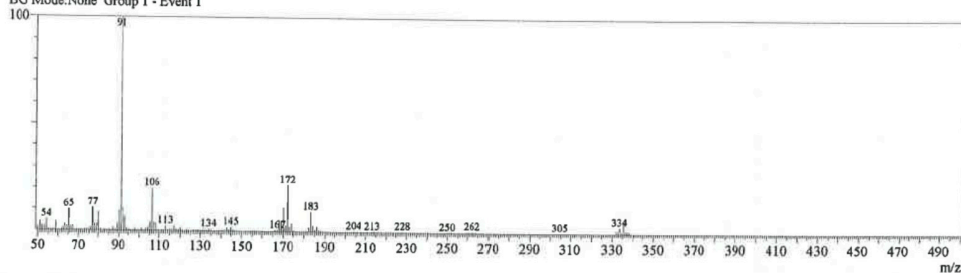

## Mass Table

Line#:1 R.Time:2.6(Scan#:318)

MassPeaks:155

RawMode:Single 2.6(318) BasePeak:91(160524)

BG Mode:None Group 1 - Event 1

| # | m/z   | Abs. In | Rel. Int. | # | m/z   | Abs. In | Rel. Int. | # | m/z   | Abs. In | Rel. Int. |
|---|-------|---------|-----------|---|-------|---------|-----------|---|-------|---------|-----------|
| 1 | 50.00 | 2658    | 1.66      | 4 | 53.05 | 3473    | 2.16      | 7 | 56.05 | 550     | 0.34      |
| 2 | 51.00 | 6460    | 4.02      | 5 | 54.00 | 8020    | 5.00      | 8 | 57.05 | 1150    | 0.72      |
| 3 | 52.00 | 3343    | 2.08      | 6 | 55.00 | 1062    | 0.66      | 9 | 58.05 | 1191    | 0.74      |

| #  | m/z    | Abs. In | Rel. Int. | #   | m/z    | Abs. In | Rel. Int. | #   | m/z    | Abs. In | Rel. Int. |
|----|--------|---------|-----------|-----|--------|---------|-----------|-----|--------|---------|-----------|
| 10 | 59.00  | 6412    | 3.99      | 59  | 108.10 | 5361    | 3.34      | 108 | 165.05 | 403     | 0.25      |
| 11 | 60.05  | 499     | 0.31      | 60  | 109.15 | 1139    | 0.71      | 109 | 166.00 | 958     | 0.60      |
| 12 | 61.05  | 407     | 0.25      | 61  | 110.20 | 305     | 0.19      | 110 | 167.05 | 986     | 0.61      |
| 13 | 62.05  | 1434    | 0.89      | 62  | 111.10 | 540     | 0.34      | 111 | 168.00 | 7663    | 4.77      |
| 14 | 63.00  | 4708    | 2.93      | 63  | 112.15 | 387     | 0.24      | 112 | 169.05 | 7641    | 4.76      |
| 15 | 64.05  | 3127    | 1.95      | 64  | 113.10 | 3642    | 2.27      | 113 | 170.00 | 17698   | 11.03     |
| 16 | 65.00  | 15834   | 9.86      | 65  | 114.10 | 929     | 0.58      | 114 | 171.05 | 4402    | 2.74      |
| 17 | 66.05  | 2618    | 1.63      | 66  | 115.05 | 1776    | 1.11      | 115 | 172.00 | 34906   | 21.75     |
| 18 | 67.05  | 2996    | 1.87      | 67  | 116.10 | 1247    | 0.78      | 116 | 172.95 | 3390    | 2.11      |
| 19 | 68.00  | 295     | 0.18      | 68  | 117.05 | 3574    | 2.23      | 117 | 174.00 | 6183    | 3.85      |
| 20 | 69.05  | 642     | 0.40      | 69  | 118.05 | 1225    | 0.76      | 118 | 174.95 | 781     | 0.49      |
| 21 | 70.05  | 500     | 0.31      | 70  | 119.05 | 1079    | 0.67      | 119 | 180.10 | 505     | 0.31      |
| 22 | 71.00  | 689     | 0.43      | 71  | 120.10 | 2570    | 1.60      | 120 | 181.15 | 596     | 0.37      |
| 23 | 72.05  | 405     | 0.25      | 72  | 121.10 | 591     | 0.37      | 121 | 182.15 | 3140    | 1.96      |
| 24 | 73.05  | 1073    | 0.67      | 73  | 122.10 | 236     | 0.15      | 122 | 183.10 | 14934   | 9.30      |
| 25 | 74.00  | 1164    | 0.73      | 74  | 123.10 | 1327    | 0.83      | 123 | 184.05 | 4336    | 2.70      |
| 26 | 75.05  | 1243    | 0.77      | 75  | 124.15 | 399     | 0.25      | 124 | 185.05 | 1336    | 0.83      |
| 27 | 76.05  | 2258    | 1.41      | 76  | 125.20 | 247     | 0.15      | 125 | 186.00 | 3825    | 2.38      |
| 28 | 77.05  | 17187   | 10.71     | 77  | 126.10 | 202     | 0.13      | 126 | 186.90 | 828     | 0.52      |
| 29 | 78.00  | 4534    | 2.82      | 78  | 127.05 | 737     | 0.46      | 127 | 187.95 | 821     | 0.51      |
| 30 | 79.05  | 4743    | 2.95      | 79  | 128.15 | 717     | 0.45      | 128 | 189.10 | 751     | 0.47      |
| 31 | 80.05  | 13542   | 8.44      | 80  | 129.10 | 815     | 0.51      | 129 | 204.20 | 516     | 0.32      |
| 32 | 81.00  | 1236    | 0.77      | 81  | 130.10 | 620     | 0.39      | 130 | 213.10 | 366     | 0.23      |
| 33 | 82.10  | 329     | 0.20      | 82  | 131.10 | 1158    | 0.72      | 131 | 214.00 | 358     | 0.22      |
| 34 | 83.10  | 711     | 0.44      | 83  | 132.10 | 758     | 0.47      | 132 | 226.00 | 281     | 0.18      |
| 35 | 84.05  | 368     | 0.23      | 84  | 133.15 | 806     | 0.50      | 133 | 228.00 | 572     | 0.36      |
| 36 | 85.10  | 649     | 0.40      | 85  | 134.10 | 1457    | 0.91      | 134 | 229.00 | 206     | 0.13      |
| 37 | 86.15  | 501     | 0.31      | 86  | 135.15 | 923     | 0.57      | 135 | 230.00 | 415     | 0.26      |
| 38 | 87.05  | 2214    | 1.38      | 87  | 139.10 | 342     | 0.21      | 136 | 250.00 | 231     | 0.14      |
| 39 | 88.15  | 823     | 0.51      | 88  | 140.00 | 332     | 0.21      | 137 | 252.00 | 313     | 0.19      |
| 40 | 89.15  | 5673    | 3.53      | 89  | 141.00 | 1113    | 0.69      | 138 | 259.20 | 471     | 0.29      |
| 41 | 90.15  | 14663   | 9.13      | 90  | 142.00 | 985     | 0.61      | 139 | 260.15 | 419     | 0.26      |
| 42 | 91.05  | 160524  | 100.00    | 91  | 143.05 | 2124    | 1.32      | 140 | 261.10 | 324     | 0.20      |
| 43 | 92.05  | 17009   | 10.60     | 92  | 144.05 | 1332    | 0.83      | 141 | 262.15 | 955     | 0.59      |
| 44 | 93.05  | 10578   | 6.59      | 93  | 145.00 | 2942    | 1.83      | 142 | 263.15 | 580     | 0.36      |
| 45 | 94.05  | 2029    | 1.26      | 94  | 146.10 | 1478    | 0.92      | 143 | 264.20 | 514     | 0.32      |
| 46 | 95.05  | 944     | 0.59      | 95  | 147.00 | 886     | 0.55      | 144 | 265.20 | 263     | 0.16      |
| 47 | 95.95  | 397     | 0.25      | 96  | 148.00 | 308     | 0.19      | 145 | 266.20 | 278     | 0.17      |
| 48 | 97.05  | 668     | 0.42      | 97  | 149.00 | 294     | 0.18      | 146 | 305.20 | 217     | 0.14      |
| 49 | 98.05  | 2091    | 1.30      | 98  | 151.00 | 228     | 0.14      | 147 | 330.20 | 210     | 0.13      |
| 50 | 99.10  | 718     | 0.45      | 99  | 152.00 | 241     | 0.15      | 148 | 332.20 | 1775    | 1.11      |
| 51 | 100.15 | 447     | 0.28      | 100 | 153.00 | 247     | 0.15      | 149 | 333.15 | 1844    | 1.15      |
| 52 | 101.10 | 2162    | 1.35      | 101 | 154.00 | 279     | 0.17      | 150 | 334.15 | 4462    | 2.78      |
| 53 | 102.05 | 672     | 0.42      | 102 | 155.00 | 318     | 0.20      | 151 | 335.20 | 1271    | 0.79      |
| 54 | 103.10 | 1687    | 1.05      | 103 | 156.00 | 302     | 0.19      | 152 | 336.15 | 8917    | 5.55      |
| 55 | 104.15 | 2403    | 1.50      | 104 | 157.00 | 351     | 0.22      | 153 | 337.15 | 1686    | 1.05      |
| 56 | 105.15 | 6490    | 4.04      | 105 | 158.00 | 441     | 0.27      | 154 | 338.15 | 1717    | 1.07      |
| 57 | 106.10 | 31970   | 19.92     | 106 | 159.20 | 439     | 0.27      | 155 | 339.05 | 308     | 0.19      |
| 58 | 107.10 | 5873    | 3.66      | 107 | 160.10 | 340     | 0.21      |     |        |         |           |

Synthesis of *N*-(benzyloxy)-2-((4-(1,3-dioxoisindolin-2-yl)phenyl)selanyl)acetamide (**13**)

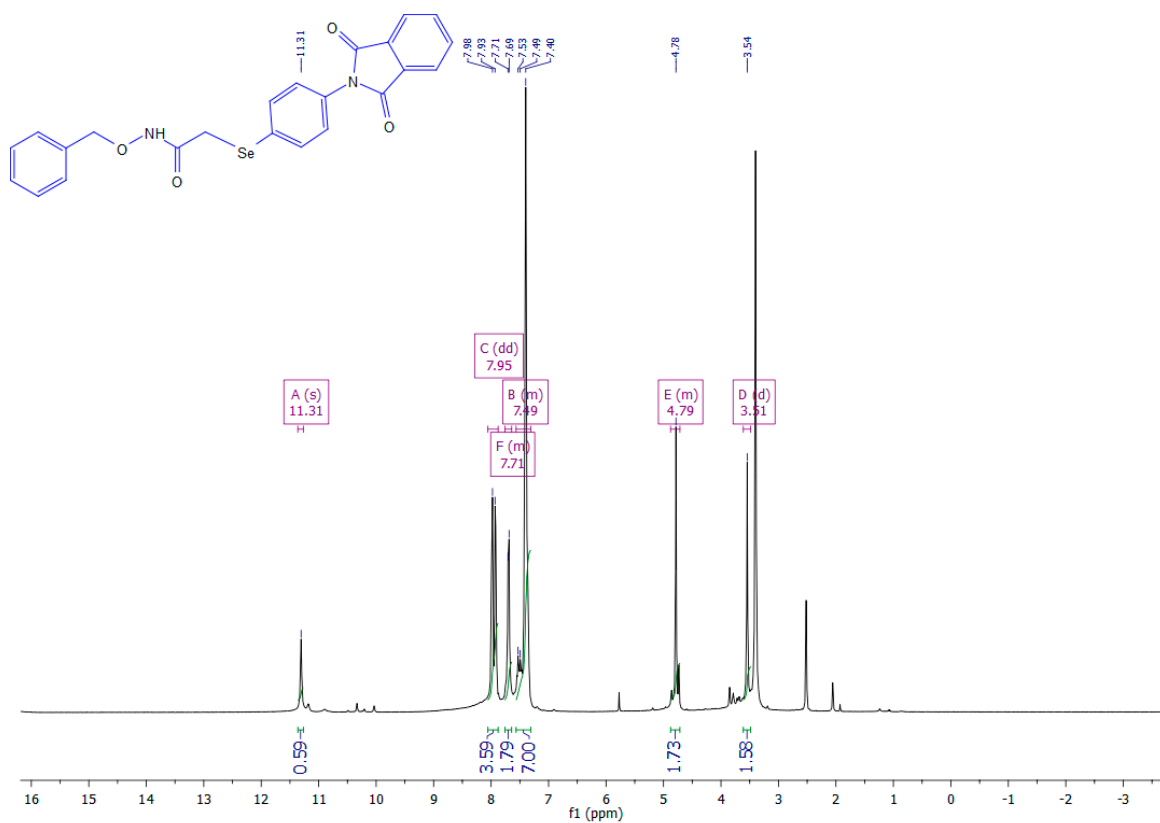

<sup>1</sup>H NMR chart of compound **13**

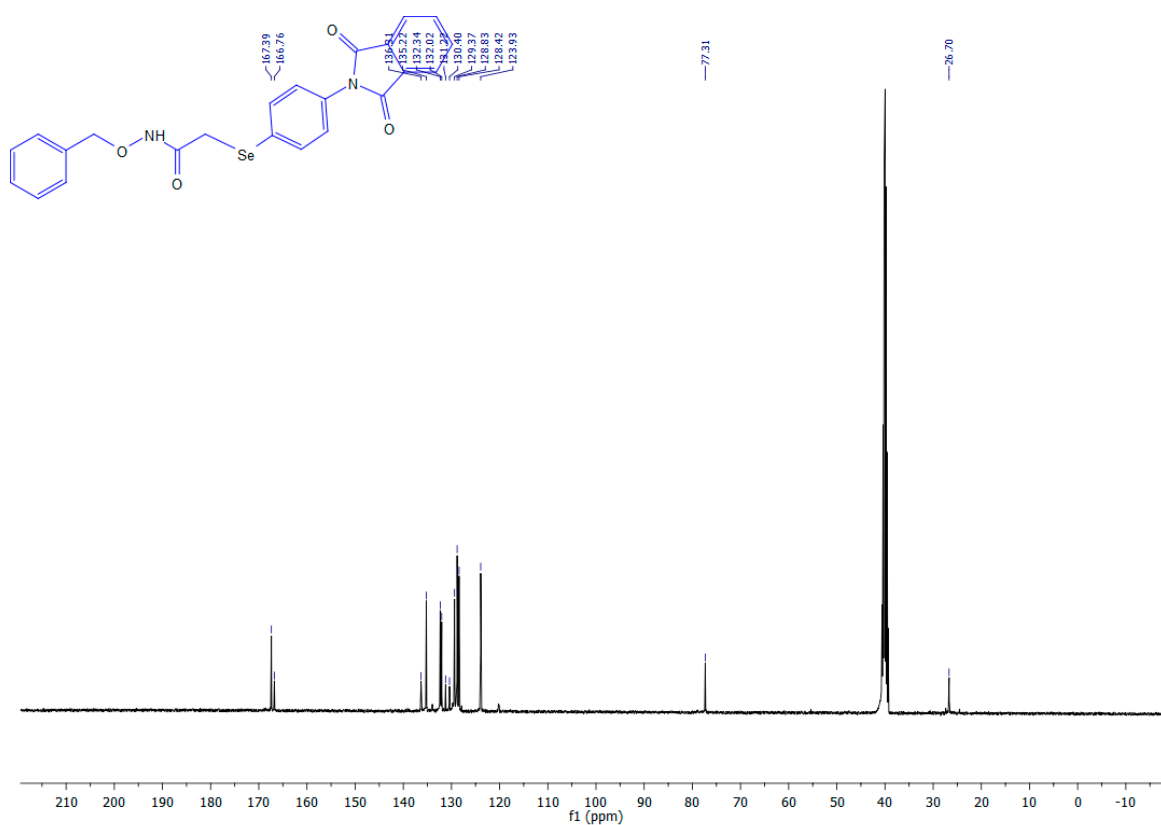

<sup>13</sup>CNMR chart of compound 13

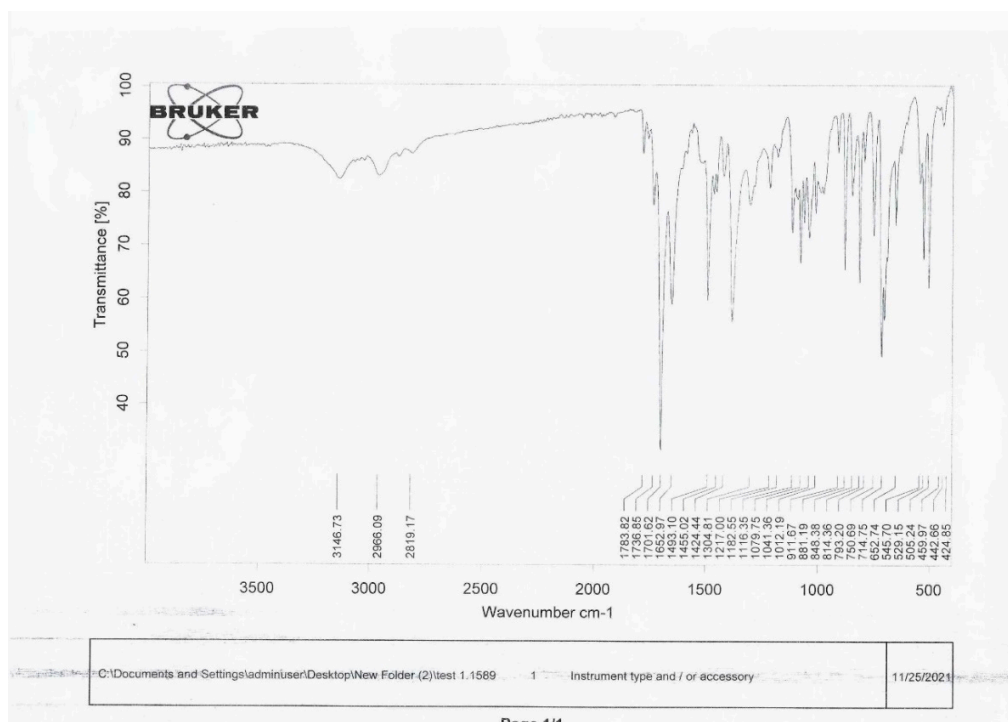

IR chart of compound 13

# **Cairo University Micro Analytical Center**

## **DI Analysis Shimadzu Qp-2010 Plus**

Sample Information  
 Analyzed by : Dr. Mai Younis  
 Analyzed : 06/01/2007 06:25:47  
 Sample Name : J16  
 Sample ID :  
 Customer Name : Dr. Mohamed Soliman - Science - Cairo  
 Data File : C:\GCMSsolution\Data\Project1\U16.QGD  
 Org Data File : C:\GCMSsolution\Data\Project1\U16.QGD  
 Method File : C:\GCMSsolution\Data\Project1\High Temperature Op  
 Org Method File : C:\GCMSsolution\Data\Project1\High Temperature Op  
 Report File :  
 Tuning File : C:\GCMSsolution\System\Tune1\\_default.qgt  
 \$EndIf\$ Modified by : Dr. Mai Younis  
 Modified : 06/01/2007 06:29:55

Method  
 Analytical Line 1  
 IonSourceTemp : 250.00 °C  
 [MS Table]  
 --Group 1 - Event 1--  
 Start Time : 0.00min  
 End Time : 10.00min  
 ACQ Mode : Scan  
 Event Time : 0.50sec  
 Scan Speed : 1000  
 Start m/z : 50.00  
 End m/z : 510.00  
 Electron Voltage : 70 eV  
 Ionization Mode : EI

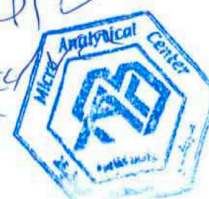

C:\GCMSsolution\Data\Project1\U16.QGD

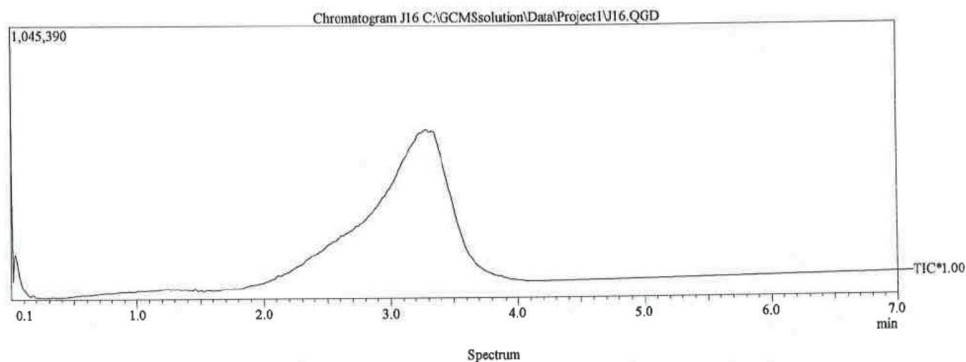

Line#:1 R.Time:3.3(Scan#:391)  
 MassPeaks:187  
 RawMode:Single 3.3(391) BasePeak:91(208863)  
 BG Mode:None Group 1 - Event 1

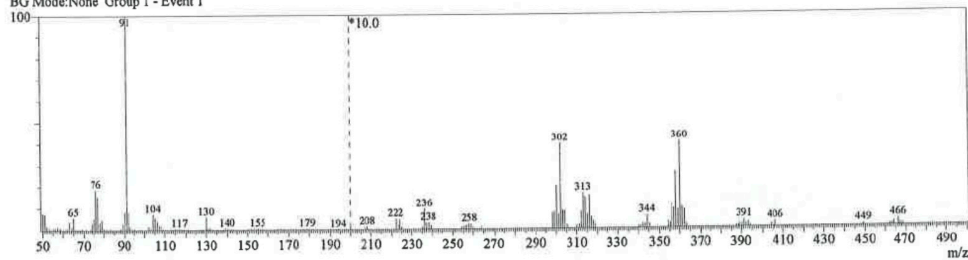

### Mass Table

Line#:1 R.Time:3.3(Scan#:391)

MassPeaks:187

RawMode:Single 3.3(391) BasePeak:91(208863)

BG Mode:None Group 1 - Event 1

| # | m/z   | Abs. In | Rel. Int. | # | m/z   | Abs. In | Rel. Int. | # | m/z   | Abs. In | Rel. Int. |
|---|-------|---------|-----------|---|-------|---------|-----------|---|-------|---------|-----------|
| 1 | 50.00 | 16015   | 7.67      | 4 | 53.05 | 1982    | 0.95      | 7 | 56.05 | 1571    | 0.75      |
| 2 | 51.00 | 15266   | 7.31      | 5 | 54.05 | 690     | 0.33      | 8 | 57.05 | 2674    | 1.28      |
| 3 | 52.00 | 3894    | 1.86      | 6 | 55.05 | 2418    | 1.16      | 9 | 58.05 | 2004    | 0.96      |

| #  | m/z    | Abs. In | Rel. Int. | #   | m/z    | Abs. In | Rel. Int. | #   | m/z    | Abs. In | Rel. Int. |
|----|--------|---------|-----------|-----|--------|---------|-----------|-----|--------|---------|-----------|
| 10 | 59.00  | 1785    | 0.85      | 70  | 119.15 | 860     | 0.41      | 130 | 255.20 | 234     | 0.11      |
| 11 | 60.00  | 601     | 0.29      | 71  | 120.10 | 350     | 0.17      | 131 | 256.20 | 322     | 0.15      |
| 12 | 60.95  | 959     | 0.46      | 72  | 121.10 | 399     | 0.19      | 132 | 257.10 | 378     | 0.18      |
| 13 | 62.05  | 2054    | 0.98      | 73  | 122.10 | 281     | 0.13      | 133 | 258.15 | 495     | 0.24      |
| 14 | 63.05  | 7960    | 3.81      | 74  | 123.10 | 284     | 0.14      | 134 | 259.05 | 435     | 0.21      |
| 15 | 64.15  | 3136    | 1.50      | 75  | 125.10 | 313     | 0.15      | 135 | 260.00 | 209     | 0.10      |
| 16 | 65.05  | 12011   | 5.75      | 76  | 126.10 | 358     | 0.17      | 136 | 264.00 | 220     | 0.11      |
| 17 | 66.05  | 1062    | 0.51      | 77  | 127.10 | 554     | 0.27      | 137 | 298.15 | 1504    | 0.72      |
| 18 | 67.10  | 916     | 0.44      | 78  | 128.05 | 461     | 0.22      | 138 | 299.15 | 1564    | 0.75      |
| 19 | 68.15  | 438     | 0.21      | 79  | 129.15 | 937     | 0.45      | 139 | 300.15 | 4131    | 1.98      |
| 20 | 69.05  | 1671    | 0.80      | 80  | 130.15 | 12238   | 5.86      | 140 | 301.25 | 1352    | 0.65      |
| 21 | 70.10  | 559     | 0.27      | 81  | 131.10 | 1382    | 0.66      | 141 | 302.15 | 8270    | 3.96      |
| 22 | 71.10  | 1407    | 0.67      | 82  | 132.10 | 2113    | 1.01      | 142 | 303.15 | 1718    | 0.82      |
| 23 | 72.15  | 348     | 0.17      | 83  | 133.15 | 459     | 0.22      | 143 | 304.15 | 1691    | 0.81      |
| 24 | 73.15  | 1422    | 0.68      | 84  | 136.10 | 274     | 0.13      | 144 | 305.20 | 353     | 0.17      |
| 25 | 74.05  | 6208    | 2.97      | 85  | 137.10 | 343     | 0.16      | 145 | 310.20 | 268     | 0.13      |
| 26 | 75.15  | 10680   | 5.11      | 86  | 138.10 | 514     | 0.25      | 146 | 311.35 | 408     | 0.20      |
| 27 | 76.05  | 39161   | 18.75     | 87  | 139.10 | 1380    | 0.66      | 147 | 312.30 | 1612    | 0.77      |
| 28 | 77.05  | 32239   | 15.44     | 88  | 140.15 | 1312    | 0.63      | 148 | 313.30 | 3425    | 1.64      |
| 29 | 78.10  | 7353    | 3.52      | 89  | 141.10 | 398     | 0.19      | 149 | 314.25 | 2991    | 1.43      |
| 30 | 79.10  | 10062   | 4.82      | 90  | 142.10 | 282     | 0.14      | 150 | 315.25 | 1330    | 0.64      |
| 31 | 80.10  | 1535    | 0.73      | 91  | 143.05 | 426     | 0.20      | 151 | 316.20 | 3210    | 1.54      |
| 32 | 81.15  | 1056    | 0.51      | 92  | 144.10 | 295     | 0.14      | 152 | 317.15 | 1051    | 0.50      |
| 33 | 82.15  | 574     | 0.27      | 93  | 150.00 | 356     | 0.17      | 153 | 318.10 | 711     | 0.34      |
| 34 | 83.10  | 1401    | 0.67      | 94  | 151.05 | 814     | 0.39      | 154 | 319.10 | 354     | 0.17      |
| 35 | 84.20  | 702     | 0.34      | 95  | 152.05 | 1030    | 0.49      | 155 | 340.10 | 206     | 0.10      |
| 36 | 85.15  | 992     | 0.47      | 96  | 153.00 | 1066    | 0.51      | 156 | 341.10 | 238     | 0.11      |
| 37 | 86.15  | 456     | 0.22      | 97  | 154.05 | 610     | 0.29      | 157 | 342.20 | 420     | 0.20      |
| 38 | 87.15  | 779     | 0.37      | 98  | 155.00 | 1230    | 0.59      | 158 | 343.30 | 382     | 0.18      |
| 39 | 88.15  | 1219    | 0.58      | 99  | 156.05 | 680     | 0.33      | 159 | 344.30 | 1217    | 0.58      |
| 40 | 89.15  | 6416    | 3.07      | 100 | 157.05 | 367     | 0.18      | 160 | 345.30 | 372     | 0.18      |
| 41 | 90.15  | 17171   | 8.22      | 101 | 158.10 | 321     | 0.15      | 161 | 354.20 | 604     | 0.29      |
| 42 | 91.10  | 208863  | 100.00    | 102 | 164.15 | 551     | 0.26      | 162 | 355.25 | 440     | 0.21      |
| 43 | 92.10  | 16934   | 8.11      | 103 | 165.10 | 740     | 0.35      | 163 | 356.25 | 2236    | 1.07      |
| 44 | 93.00  | 3321    | 1.59      | 104 | 166.10 | 1158    | 0.55      | 164 | 357.25 | 1845    | 0.88      |
| 45 | 94.05  | 841     | 0.40      | 105 | 167.05 | 446     | 0.21      | 165 | 358.20 | 5396    | 2.58      |
| 46 | 95.10  | 1343    | 0.64      | 106 | 168.10 | 378     | 0.18      | 166 | 359.25 | 1724    | 0.83      |
| 47 | 96.15  | 528     | 0.25      | 107 | 168.95 | 305     | 0.15      | 167 | 360.20 | 8442    | 4.04      |
| 48 | 97.20  | 977     | 0.47      | 108 | 169.90 | 500     | 0.24      | 168 | 361.15 | 2023    | 0.97      |
| 49 | 98.15  | 896     | 0.43      | 109 | 170.90 | 215     | 0.10      | 169 | 362.20 | 1754    | 0.84      |
| 50 | 99.10  | 390     | 0.19      | 110 | 171.90 | 202     | 0.10      | 170 | 363.15 | 374     | 0.18      |
| 51 | 100.10 | 342     | 0.16      | 111 | 177.15 | 564     | 0.27      | 171 | 387.20 | 204     | 0.10      |
| 52 | 101.15 | 660     | 0.32      | 112 | 178.15 | 659     | 0.32      | 172 | 388.20 | 217     | 0.10      |
| 53 | 102.10 | 3724    | 1.78      | 113 | 179.15 | 992     | 0.47      | 173 | 389.10 | 410     | 0.20      |
| 54 | 103.15 | 2054    | 0.98      | 114 | 180.20 | 425     | 0.20      | 174 | 390.25 | 296     | 0.14      |
| 55 | 104.10 | 15006   | 7.18      | 115 | 193.20 | 303     | 0.15      | 175 | 391.20 | 708     | 0.34      |
| 56 | 105.10 | 11479   | 5.50      | 116 | 194.20 | 324     | 0.16      | 176 | 392.20 | 353     | 0.17      |
| 57 | 106.15 | 8538    | 4.09      | 117 | 198.20 | 222     | 0.11      | 177 | 393.25 | 511     | 0.24      |
| 58 | 107.15 | 4476    | 2.14      | 118 | 207.20 | 217     | 0.10      | 178 | 394.20 | 210     | 0.10      |
| 59 | 108.15 | 4944    | 2.37      | 119 | 208.20 | 258     | 0.12      | 179 | 404.20 | 295     | 0.14      |
| 60 | 109.20 | 892     | 0.43      | 120 | 222.15 | 999     | 0.48      | 180 | 406.20 | 508     | 0.24      |
| 61 | 110.20 | 335     | 0.16      | 121 | 223.15 | 408     | 0.20      | 181 | 449.20 | 220     | 0.11      |
| 62 | 111.15 | 662     | 0.32      | 122 | 224.15 | 905     | 0.43      | 182 | 462.20 | 220     | 0.11      |
| 63 | 112.15 | 366     | 0.18      | 123 | 225.20 | 242     | 0.12      | 183 | 463.20 | 220     | 0.11      |
| 64 | 113.10 | 798     | 0.38      | 124 | 235.20 | 250     | 0.12      | 184 | 464.20 | 406     | 0.19      |
| 65 | 114.15 | 572     | 0.27      | 125 | 236.15 | 1946    | 0.93      | 185 | 466.25 | 662     | 0.32      |
| 66 | 115.10 | 1082    | 0.52      | 126 | 237.15 | 577     | 0.28      | 186 | 467.30 | 231     | 0.11      |
| 67 | 116.15 | 748     | 0.36      | 127 | 238.15 | 643     | 0.31      | 187 | 468.30 | 218     | 0.10      |
| 68 | 117.10 | 1370    | 0.66      | 128 | 239.20 | 332     | 0.16      |     |        |         |           |
| 69 | 118.10 | 487     | 0.23      | 129 | 254.20 | 210     | 0.10      |     |        |         |           |

Synthesis of *N*-(benzyloxy)-2-((4-(2-chloroacetamido)phenyl)selanyl)acetamide (**14**)

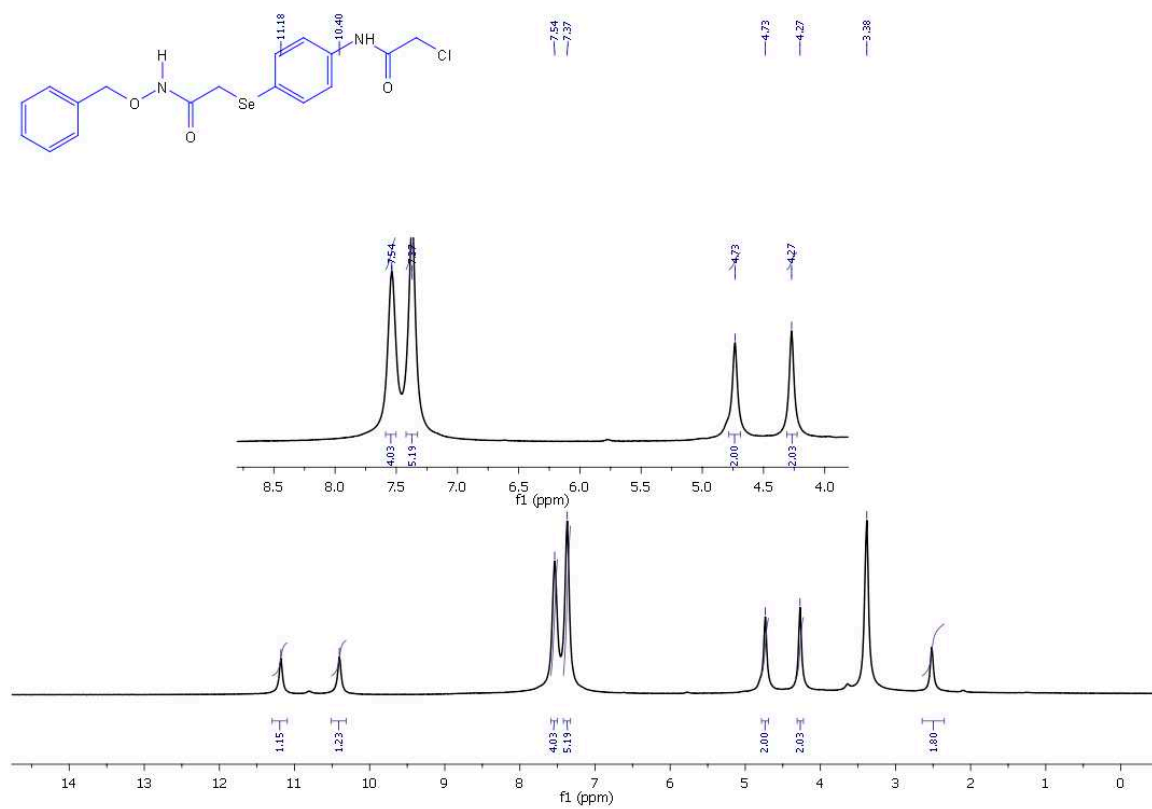

<sup>1</sup>H NMR chart of compound **14**



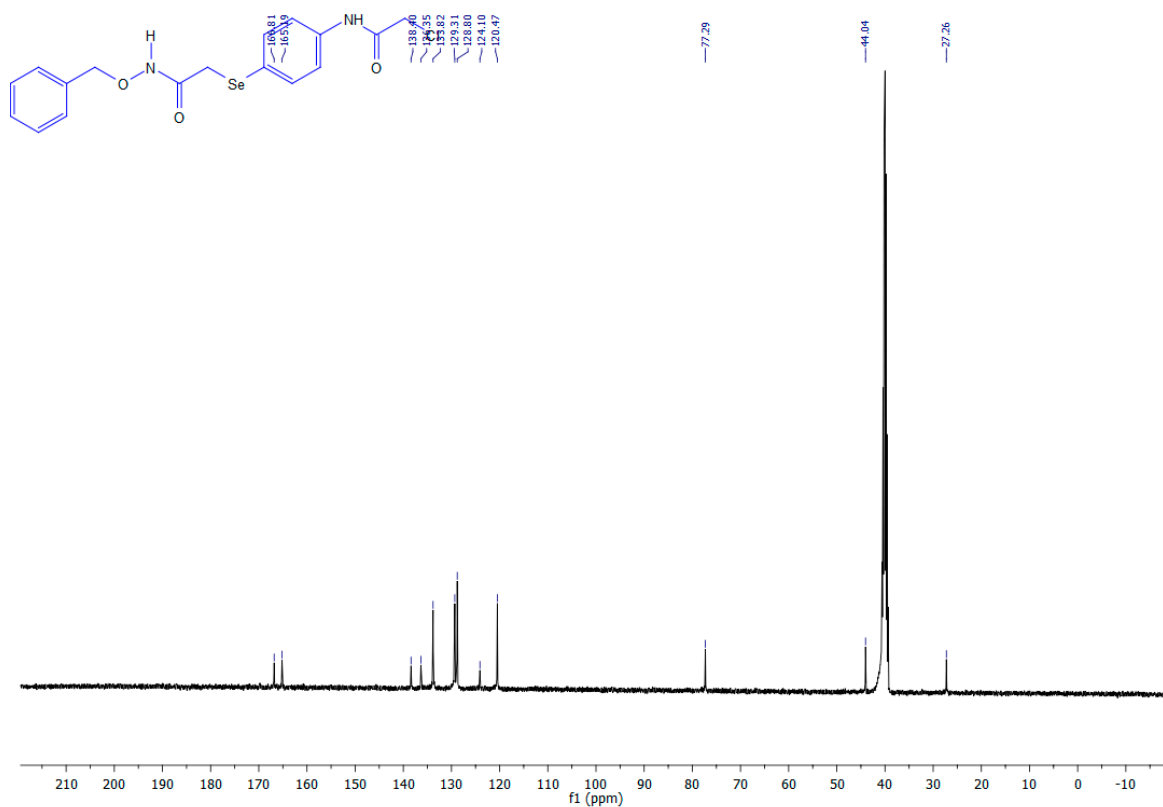

$^{13}\text{C}$ NMR chart of compound 14

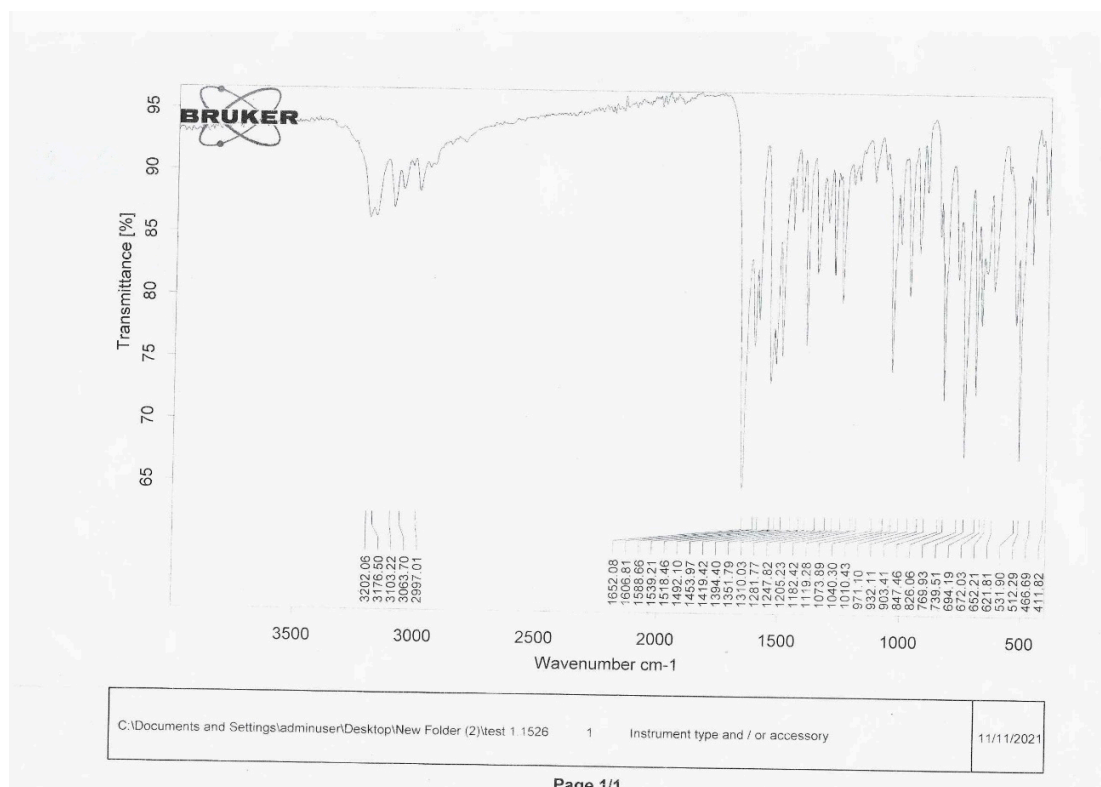

IR chart of compound **14**

# **Cairo University Micro Analytical Center**

## **DI Analysis Shimadzu Qp-2010 Plus**

Sample Information  
 Analyzed by : Dr. Mai Younis  
 Analyzed : 06/01/2007 06:15:31  
 Sample Name : J11  
 Sample ID :  
 Customer Name : Dr. Mohamed Soliman - Science - Cairo  
 Data File : C:\GCMSsolution\Data\Project1\J11.QGD  
 Org Data File : C:\GCMSsolution\Data\Project1\J11.QGD  
 Method File : C:\GCMSsolution\Data\Project1\High Temperature Op  
 Org Method File : C:\GCMSsolution\Data\Project1\High Temperature Op  
 Report File :  
 Tuning File : C:\GCMSsolution\System\Tune1\\_default.qgt  
 \$End1\$Modified by : Dr. Mai Younis  
 Modified : 06/01/2007 06:21:22

### Method

Analytical Line 1  
 IonSourceTemp : 250.00 °C  
 [MS Table]  
 ~Group 1 - Event 1--  
 Start Time : -0.00min  
 End Time : 10.00min  
 ACQ Mode : Scan  
 Event Time : 0.50sec  
 Scan Speed : 1000  
 Start m/z : 50.00  
 End m/z : 510.00  
 Electron Voltage : 70 eV  
 Ionization Mode : EI

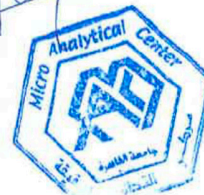

C:\GCMSsolution\Data\Project1\J11.QGD

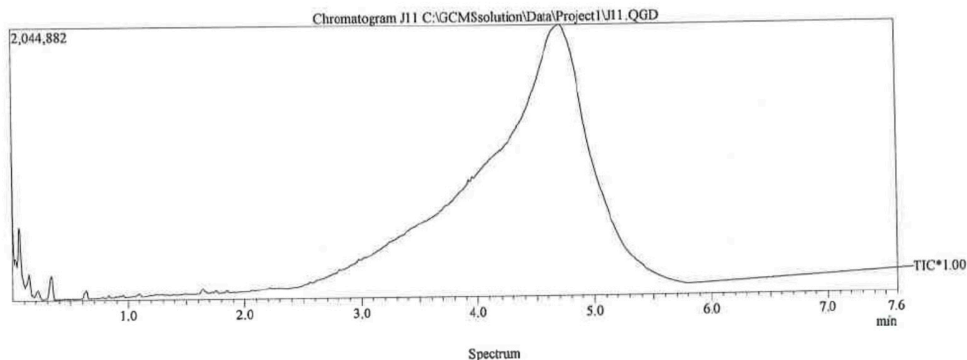

Line#:1 R.Time:4.7(Scan#:570)  
 MassPeaks:238  
 RawMode:Single 4.7(570) BasePeak:91(851255)  
 BG Mode:None Group 1 - Event 1

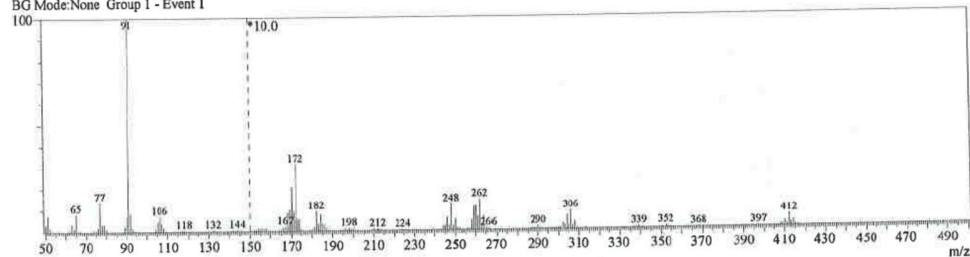

### Mass Table

Line#:1 R.Time:4.7(Scan#:570)

MassPeaks:238

RawMode:Single 4.7(570) BasePeak:91(851255)

BG Mode:None Group 1 - Event 1

| # | m/z   | Abs. In | Rel. Int. | # | m/z   | Abs. In | Rel. Int. |
|---|-------|---------|-----------|---|-------|---------|-----------|
| 1 | 50.05 | 26498   | 3.11      | 4 | 53.05 | 6330    | 0.74      |
| 2 | 51.00 | 62826   | 7.38      | 5 | 54.00 | 2010    | 0.24      |
| 3 | 52.05 | 16634   | 1.95      | 6 | 55.05 | 3162    | 0.37      |
|   |       |         |           | 7 | 56.05 | 3355    | 0.39      |
|   |       |         |           | 8 | 57.10 | 3425    | 0.40      |
|   |       |         |           | 9 | 58.05 | 2314    | 0.27      |

| #  | m/z    | Abs. In | Rel. Int. | #   | m/z    | Abs. In | Rel. Int. | #   | m/z    | Abs. In | Rel. Int. |
|----|--------|---------|-----------|-----|--------|---------|-----------|-----|--------|---------|-----------|
| 10 | 59.00  | 2914    | 0.34      | 79  | 128.05 | 830     | 0.10      | 148 | 210.10 | 681     | 0.08      |
| 11 | 60.00  | 846     | 0.10      | 80  | 129.05 | 781     | 0.09      | 149 | 211.00 | 308     | 0.04      |
| 12 | 61.05  | 2677    | 0.31      | 81  | 130.05 | 1057    | 0.12      | 150 | 212.00 | 692     | 0.08      |
| 13 | 62.05  | 8432    | 0.99      | 82  | 131.25 | 855     | 0.10      | 151 | 212.90 | 433     | 0.05      |
| 14 | 63.05  | 30193   | 3.55      | 83  | 132.15 | 4499    | 0.53      | 152 | 213.90 | 295     | 0.03      |
| 15 | 64.05  | 14147   | 1.66      | 84  | 133.15 | 3408    | 0.40      | 153 | 224.40 | 366     | 0.04      |
| 16 | 65.05  | 69432   | 8.16      | 85  | 134.20 | 1378    | 0.16      | 154 | 225.40 | 268     | 0.03      |
| 17 | 66.05  | 5685    | 0.67      | 86  | 135.20 | 559     | 0.07      | 155 | 229.40 | 263     | 0.03      |
| 18 | 67.05  | 3844    | 0.45      | 87  | 136.20 | 476     | 0.06      | 156 | 239.40 | 620     | 0.07      |
| 19 | 68.00  | 850     | 0.10      | 88  | 137.20 | 385     | 0.05      | 157 | 240.40 | 220     | 0.03      |
| 20 | 69.00  | 1666    | 0.20      | 89  | 138.10 | 638     | 0.07      | 158 | 242.40 | 286     | 0.03      |
| 21 | 70.10  | 676     | 0.08      | 90  | 139.15 | 822     | 0.10      | 159 | 243.10 | 233     | 0.03      |
| 22 | 71.10  | 1313    | 0.15      | 91  | 140.05 | 1877    | 0.22      | 160 | 244.10 | 1740    | 0.20      |
| 23 | 72.00  | 567     | 0.07      | 92  | 141.10 | 2433    | 0.29      | 161 | 245.10 | 1831    | 0.22      |
| 24 | 73.05  | 1953    | 0.23      | 93  | 142.05 | 3545    | 0.42      | 162 | 246.10 | 4918    | 0.58      |
| 25 | 74.05  | 7741    | 0.91      | 94  | 143.05 | 2860    | 0.34      | 163 | 247.15 | 1825    | 0.21      |
| 26 | 75.10  | 6108    | 0.72      | 95  | 144.05 | 5590    | 0.66      | 164 | 248.05 | 10251   | 1.20      |
| 27 | 76.15  | 16573   | 1.95      | 96  | 145.00 | 3033    | 0.36      | 165 | 249.10 | 1668    | 0.20      |
| 28 | 77.05  | 117544  | 13.81     | 97  | 146.10 | 1969    | 0.23      | 166 | 250.10 | 4417    | 0.52      |
| 29 | 78.10  | 28295   | 3.32      | 98  | 147.10 | 1087    | 0.13      | 167 | 251.05 | 826     | 0.10      |
| 30 | 79.05  | 29940   | 3.52      | 99  | 148.10 | 410     | 0.05      | 168 | 252.15 | 699     | 0.08      |
| 31 | 80.10  | 12058   | 1.42      | 100 | 149.10 | 345     | 0.04      | 169 | 253.20 | 284     | 0.03      |
| 32 | 81.05  | 2067    | 0.24      | 101 | 150.10 | 300     | 0.04      | 170 | 255.20 | 297     | 0.03      |
| 33 | 82.05  | 503     | 0.06      | 102 | 151.10 | 356     | 0.04      | 171 | 256.20 | 447     | 0.05      |
| 34 | 83.10  | 1474    | 0.17      | 103 | 152.10 | 687     | 0.08      | 172 | 257.15 | 449     | 0.05      |
| 35 | 84.10  | 961     | 0.11      | 104 | 153.05 | 614     | 0.07      | 173 | 258.15 | 3861    | 0.45      |
| 36 | 85.10  | 1204    | 0.14      | 105 | 154.05 | 1135    | 0.13      | 174 | 259.15 | 9088    | 1.07      |
| 37 | 86.15  | 822     | 0.10      | 106 | 155.10 | 850     | 0.10      | 175 | 260.15 | 9463    | 1.11      |
| 38 | 87.05  | 1128    | 0.13      | 107 | 156.10 | 1455    | 0.17      | 176 | 261.15 | 5402    | 0.63      |
| 39 | 88.15  | 1785    | 0.21      | 108 | 157.00 | 878     | 0.10      | 177 | 262.10 | 12170   | 1.43      |
| 40 | 89.10  | 18943   | 2.23      | 109 | 158.00 | 1070    | 0.13      | 178 | 263.10 | 2558    | 0.30      |
| 41 | 90.15  | 59327   | 6.97      | 110 | 159.00 | 340     | 0.04      | 179 | 264.10 | 5287    | 0.62      |
| 42 | 91.10  | 851255  | 100.00    | 111 | 160.00 | 266     | 0.03      | 180 | 265.20 | 1114    | 0.13      |
| 43 | 92.10  | 72916   | 8.57      | 112 | 161.00 | 206     | 0.02      | 181 | 266.15 | 712     | 0.08      |
| 44 | 93.05  | 15277   | 1.79      | 113 | 162.00 | 274     | 0.03      | 182 | 267.20 | 252     | 0.03      |
| 45 | 94.05  | 4637    | 0.54      | 114 | 164.00 | 314     | 0.04      | 183 | 269.20 | 226     | 0.03      |
| 46 | 95.00  | 2529    | 0.30      | 115 | 165.05 | 614     | 0.07      | 184 | 272.20 | 212     | 0.02      |
| 47 | 96.05  | 827     | 0.10      | 116 | 166.00 | 1231    | 0.14      | 185 | 278.20 | 230     | 0.03      |
| 48 | 97.10  | 1162    | 0.14      | 117 | 167.05 | 1808    | 0.21      | 186 | 280.20 | 254     | 0.03      |
| 49 | 98.15  | 1043    | 0.12      | 118 | 168.05 | 7175    | 0.84      | 187 | 282.20 | 303     | 0.04      |
| 50 | 99.00  | 652     | 0.08      | 119 | 169.05 | 8355    | 0.98      | 188 | 283.20 | 212     | 0.02      |
| 51 | 100.10 | 204     | 0.02      | 120 | 170.05 | 17341   | 2.04      | 189 | 285.20 | 290     | 0.03      |
| 52 | 101.10 | 489     | 0.06      | 121 | 171.15 | 7406    | 0.87      | 190 | 286.20 | 407     | 0.05      |
| 53 | 102.10 | 1054    | 0.12      | 122 | 172.05 | 26661   | 3.13      | 191 | 287.00 | 452     | 0.05      |
| 54 | 103.15 | 2371    | 0.28      | 123 | 173.05 | 4747    | 0.56      | 192 | 288.10 | 612     | 0.07      |
| 55 | 104.15 | 10392   | 1.22      | 124 | 174.05 | 4511    | 0.53      | 193 | 289.10 | 527     | 0.06      |
| 56 | 105.15 | 38854   | 4.56      | 125 | 175.00 | 791     | 0.09      | 194 | 290.10 | 1241    | 0.15      |
| 57 | 106.15 | 60369   | 7.09      | 126 | 176.00 | 233     | 0.03      | 195 | 291.00 | 527     | 0.06      |
| 58 | 107.15 | 31898   | 3.75      | 127 | 178.00 | 207     | 0.02      | 196 | 292.05 | 599     | 0.07      |
| 59 | 108.15 | 15831   | 1.86      | 128 | 179.00 | 254     | 0.03      | 197 | 293.10 | 290     | 0.03      |
| 60 | 109.15 | 2705    | 0.32      | 129 | 180.05 | 754     | 0.09      | 198 | 294.10 | 327     | 0.04      |
| 61 | 110.10 | 751     | 0.09      | 130 | 181.15 | 1492    | 0.18      | 199 | 295.10 | 407     | 0.05      |
| 62 | 111.10 | 777     | 0.09      | 131 | 182.10 | 7746    | 0.91      | 200 | 296.10 | 358     | 0.04      |
| 63 | 112.15 | 775     | 0.09      | 132 | 183.10 | 2647    | 0.31      | 201 | 297.10 | 460     | 0.05      |
| 64 | 113.05 | 1096    | 0.13      | 133 | 184.05 | 6362    | 0.75      | 202 | 298.10 | 350     | 0.04      |
| 65 | 114.10 | 1684    | 0.20      | 134 | 185.05 | 2702    | 0.32      | 203 | 299.10 | 417     | 0.05      |
| 66 | 115.05 | 2828    | 0.33      | 135 | 186.05 | 2279    | 0.27      | 204 | 300.15 | 751     | 0.09      |
| 67 | 116.15 | 2603    | 0.31      | 136 | 186.95 | 1198    | 0.14      | 205 | 301.05 | 620     | 0.07      |
| 68 | 117.05 | 5078    | 0.60      | 137 | 187.95 | 307     | 0.04      | 206 | 302.10 | 2270    | 0.27      |
| 69 | 118.05 | 5122    | 0.60      | 138 | 189.00 | 295     | 0.03      | 207 | 303.10 | 1636    | 0.19      |
| 70 | 119.10 | 2842    | 0.33      | 139 | 194.00 | 290     | 0.03      | 208 | 304.10 | 5492    | 0.65      |
| 71 | 120.10 | 2775    | 0.33      | 140 | 195.10 | 271     | 0.03      | 209 | 305.05 | 1488    | 0.17      |
| 72 | 121.20 | 1481    | 0.17      | 141 | 196.10 | 839     | 0.10      | 210 | 306.10 | 7274    | 0.85      |
| 73 | 122.15 | 780     | 0.09      | 142 | 197.00 | 417     | 0.05      | 211 | 307.05 | 1272    | 0.15      |
| 74 | 123.10 | 1151    | 0.14      | 143 | 198.00 | 918     | 0.11      | 212 | 308.10 | 3009    | 0.35      |
| 75 | 124.30 | 729     | 0.09      | 144 | 199.05 | 516     | 0.06      | 213 | 309.05 | 553     | 0.06      |
| 76 | 125.30 | 647     | 0.08      | 145 | 200.10 | 906     | 0.11      | 214 | 310.10 | 318     | 0.04      |
| 77 | 126.05 | 519     | 0.06      | 146 | 202.10 | 218     | 0.03      | 215 | 311.10 | 228     | 0.03      |
| 78 | 127.05 | 590     | 0.07      | 147 | 209.10 | 314     | 0.04      | 216 | 313.40 | 556     | 0.07      |

06-Jan-07 18:22:50

| #   | m/z    | Abs. In | Rel. Int. | #   | m/z    | Abs. In | Rel. Int. | #   | m/z    | Abs. In | Rel. Int. |
|-----|--------|---------|-----------|-----|--------|---------|-----------|-----|--------|---------|-----------|
| 217 | 336.30 | 257     | 0.03      | 225 | 354.30 | 361     | 0.04      | 233 | 411.20 | 894     | 0.11      |
| 218 | 337.25 | 437     | 0.05      | 226 | 368.30 | 201     | 0.02      | 234 | 412.20 | 4748    | 0.56      |
| 219 | 338.30 | 482     | 0.06      | 227 | 394.30 | 204     | 0.02      | 235 | 413.10 | 1244    | 0.15      |
| 220 | 339.30 | 622     | 0.07      | 228 | 396.30 | 209     | 0.02      | 236 | 414.10 | 2274    | 0.27      |
| 221 | 341.30 | 247     | 0.03      | 229 | 397.30 | 242     | 0.03      | 237 | 415.10 | 535     | 0.06      |
| 222 | 350.30 | 295     | 0.03      | 230 | 408.15 | 840     | 0.10      | 238 | 416.20 | 462     | 0.05      |
| 223 | 352.30 | 820     | 0.10      | 231 | 409.10 | 1046    | 0.12      |     |        |         |           |
| 224 | 353.30 | 207     | 0.02      | 232 | 410.10 | 2286    | 0.27      |     |        |         |           |

*Synthesis of ethyl 2-(2-(4-((2-((benzyloxy)amino)-2-oxoethyl)selenanyl)phenyl)hydrazineylidene)-2-cyanoacetate (**15**)*

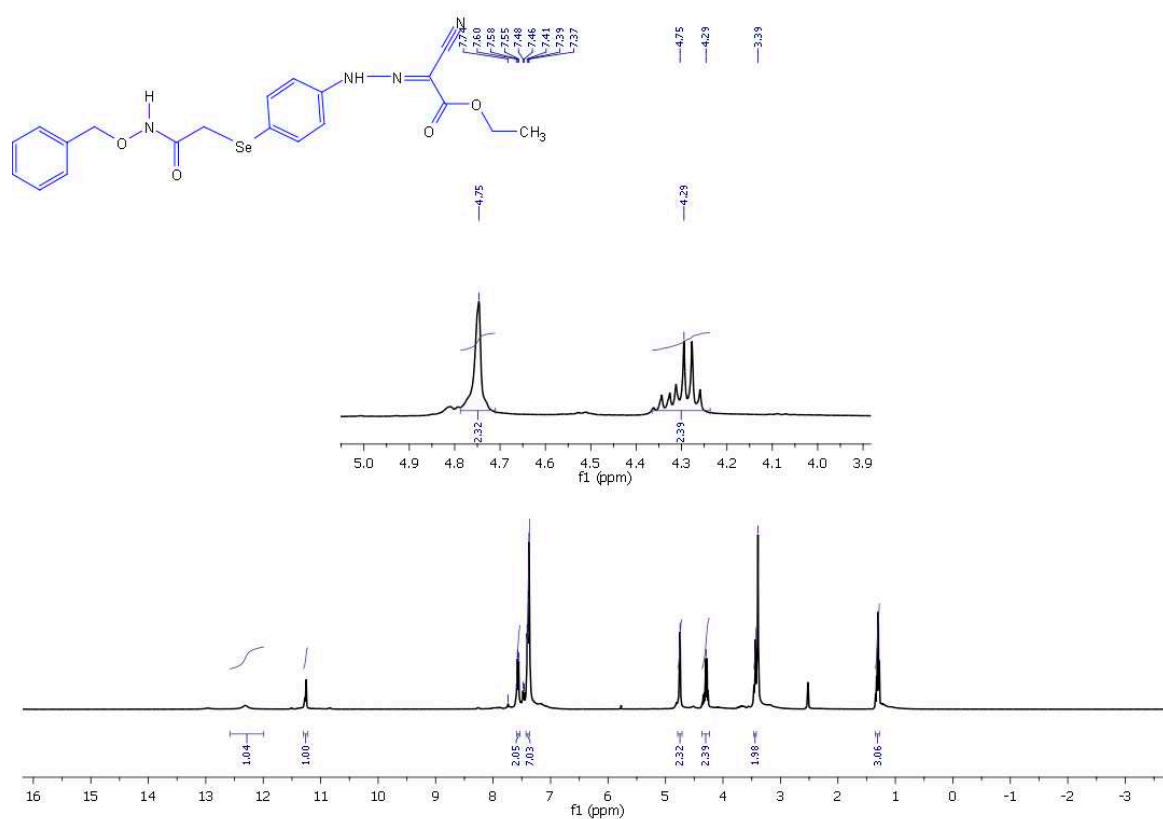

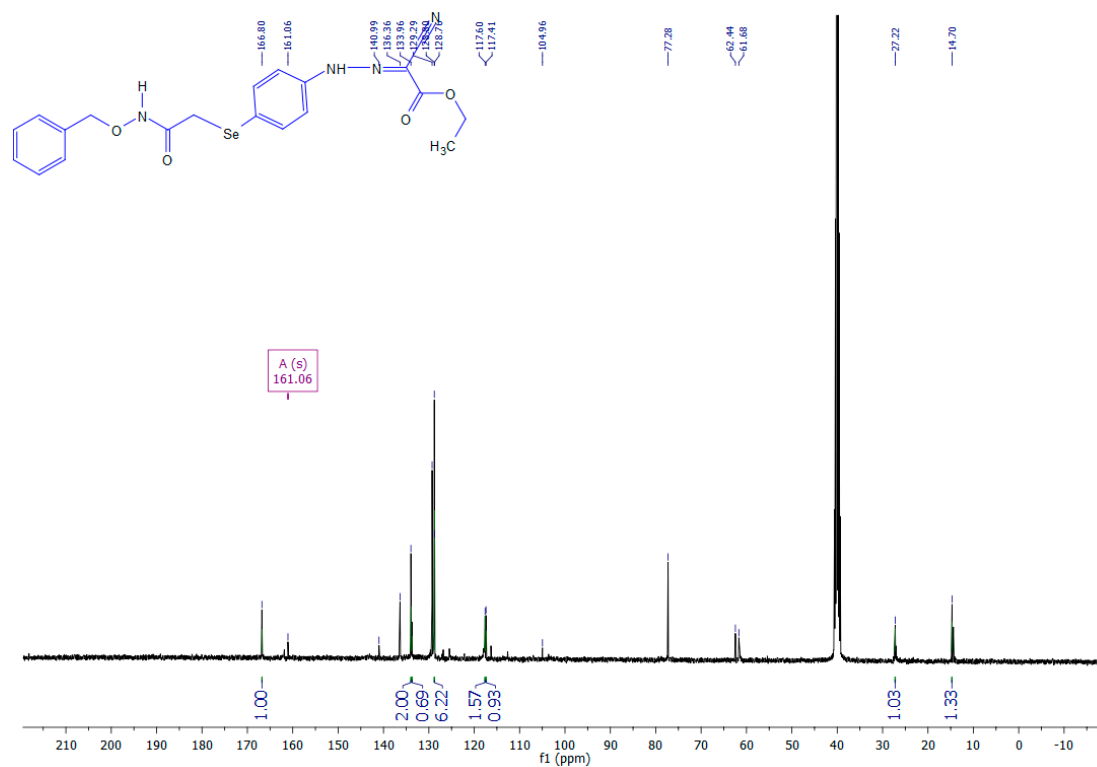

$^{13}\text{C}$ NMR chart of compound 15

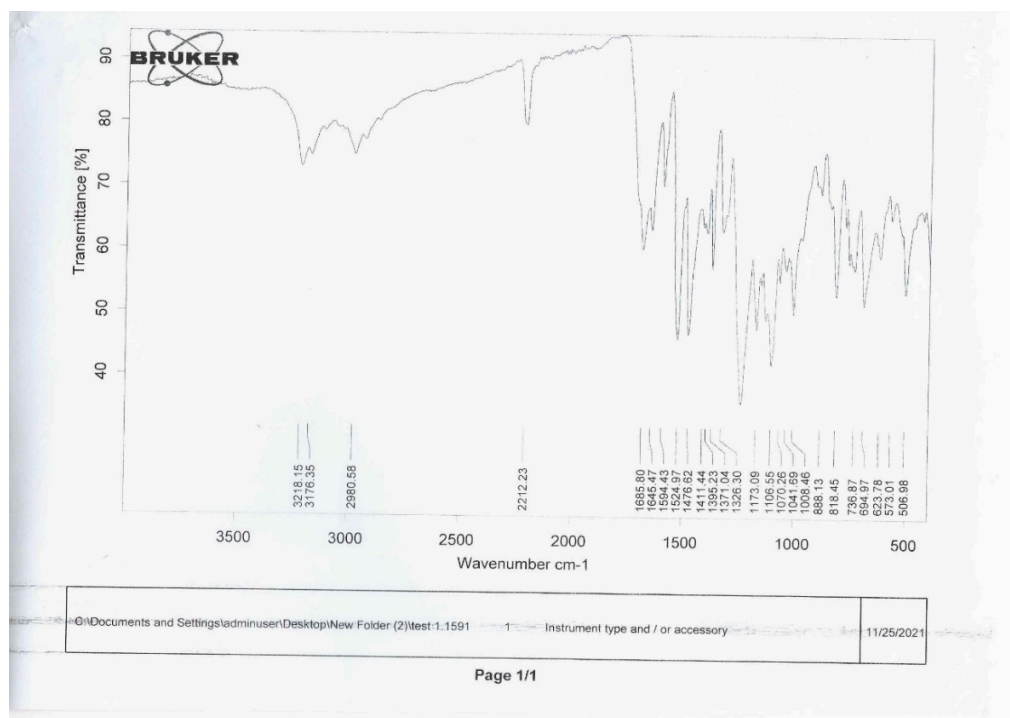

IR chart of compound 15

# Cairo University Micro Analytical Center

## DI Analysis Shimadzu Qp-2010 Plus

Sample Information  
 Analyzed by : Dr. Mai Younis  
 Analyzed : 09/01/2007 06:01:28  
 Sample Name : J13.  
 Sample ID :  
 Customer Name : Dr. Mohamed Soliman - Science - Cairo  
 Data File : C:\GCMSolution\Data\Project\U13..QGD  
 Org Data File : C:\GCMSolution\Data\Project\U13..QGD  
 Method File : C:\GCMSolution\Data\Project\High Temperature Op  
 Org Method File : C:\GCMSolution\Data\Project\High Temperature Op  
 Report File :  
 Tuning File : C:\GCMSolution\System\Tune1\\_default.qgt  
 \$EndIf\$Modified by : Dr. Mai Younis  
 Modified : 09/01/2007 06:06:59

Method  
 Analytical Line 1  
 IonSourceTemp : 250.00 °C  
 [MS Table]  
 -Group 1 - Event 1--  
 Start Time : 0.00min  
 End Time : 10.00min  
 ACQ Mode : Scan  
 Event Time : 0.50sec  
 Scan Speed : 1000  
 Start m/z : 50.00  
 End m/z : 510.00

Electron Voltage : 70 eV  
 Ionization Mode : EI

C:\GCMSolution\Data\Project\U13..QGD

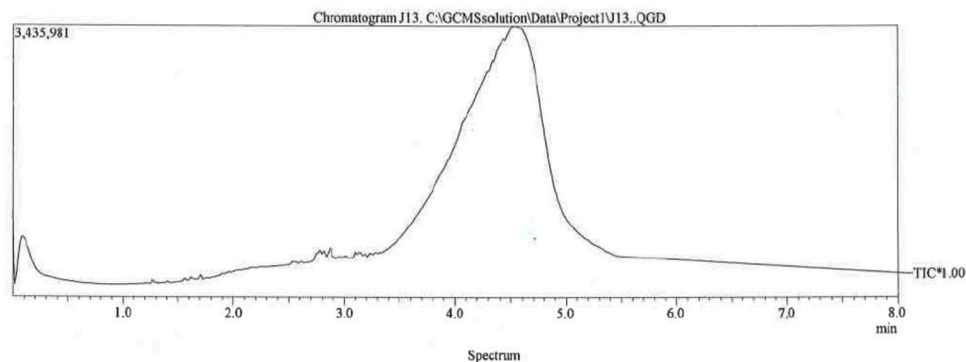

Line#:1 R.Time:4.5(Scan#:546)  
 MassPeaks:391  
 RawMode:Single 4.5(546) BasePeak:91(1088295)  
 BG Mode:None Group 1 - Event 1

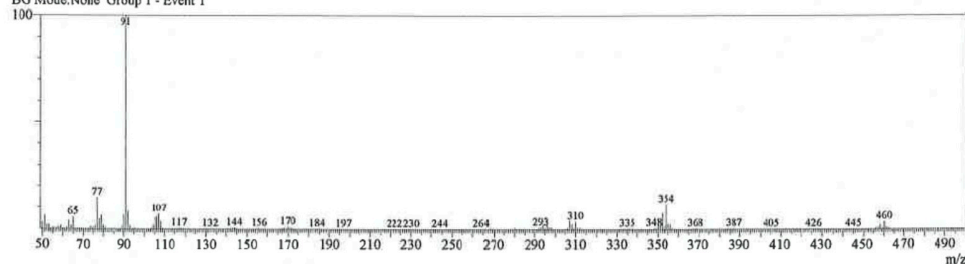

Mass Table  
 Line#:1 R.Time:4.5(Scan#:546)  
 MassPeaks:391  
 RawMode:Single 4.5(546) BasePeak:91(1088295)  
 BG Mode:None Group 1 - Event 1

| # | m/z   | Abs. In | Rel. Int. | # | m/z   | Abs. In | Rel. Int. | # | m/z   | Abs. In | Rel. Int. |
|---|-------|---------|-----------|---|-------|---------|-----------|---|-------|---------|-----------|
| 1 | 50.00 | 35905   | 3.30      | 4 | 53.00 | 23239   | 2.14      | 7 | 56.05 | 9613    | 0.88      |
| 2 | 51.00 | 69214   | 6.36      | 5 | 54.00 | 5132    | 0.47      | 8 | 57.05 | 7929    | 0.73      |
| 3 | 52.00 | 25001   | 2.30      | 6 | 55.05 | 8060    | 0.74      | 9 | 58.05 | 11656   | 1.07      |



| #  | m/z    | Abs. In | Rel. Int. | #   | m/z    | Abs. In | Rel. Int. | #   | m/z    | Abs. In | Rel. Int. |
|----|--------|---------|-----------|-----|--------|---------|-----------|-----|--------|---------|-----------|
| 10 | 59.05  | 18779   | 1.73      | 79  | 128.10 | 1175    | 0.11      | 148 | 202.00 | 535     | 0.05      |
| 11 | 60.00  | 3244    | 0.30      | 80  | 129.15 | 1449    | 0.13      | 149 | 203.00 | 254     | 0.02      |
| 12 | 61.00  | 4092    | 0.38      | 81  | 130.10 | 1578    | 0.14      | 150 | 218.80 | 241     | 0.02      |
| 13 | 62.05  | 10194   | 0.94      | 82  | 131.10 | 2001    | 0.18      | 151 | 219.80 | 438     | 0.04      |
| 14 | 63.05  | 43298   | 3.98      | 83  | 132.15 | 2207    | 0.20      | 152 | 222.05 | 1162    | 0.11      |
| 15 | 64.05  | 19782   | 1.82      | 84  | 133.20 | 1822    | 0.17      | 153 | 222.95 | 299     | 0.03      |
| 16 | 65.05  | 61036   | 5.61      | 85  | 134.20 | 1015    | 0.09      | 154 | 223.95 | 510     | 0.05      |
| 17 | 66.05  | 5760    | 0.53      | 86  | 135.15 | 882     | 0.08      | 155 | 225.00 | 340     | 0.03      |
| 18 | 67.05  | 5302    | 0.49      | 87  | 136.10 | 662     | 0.06      | 156 | 226.05 | 688     | 0.06      |
| 19 | 68.05  | 3181    | 0.29      | 88  | 137.15 | 839     | 0.08      | 157 | 227.05 | 670     | 0.06      |
| 20 | 69.05  | 5267    | 0.48      | 89  | 138.15 | 1015    | 0.09      | 158 | 228.05 | 1247    | 0.11      |
| 21 | 70.05  | 2000    | 0.18      | 90  | 139.05 | 1126    | 0.10      | 159 | 229.20 | 743     | 0.07      |
| 22 | 71.10  | 4175    | 0.38      | 91  | 140.00 | 2246    | 0.21      | 160 | 230.15 | 1767    | 0.16      |
| 23 | 72.05  | 1210    | 0.11      | 92  | 141.05 | 2955    | 0.27      | 161 | 231.25 | 612     | 0.06      |
| 24 | 73.05  | 5219    | 0.48      | 93  | 142.00 | 4098    | 0.38      | 162 | 232.20 | 641     | 0.06      |
| 25 | 74.00  | 12913   | 1.19      | 94  | 143.05 | 4491    | 0.41      | 163 | 233.20 | 614     | 0.06      |
| 26 | 75.05  | 9770    | 0.90      | 95  | 144.05 | 7770    | 0.71      | 164 | 234.25 | 626     | 0.06      |
| 27 | 76.15  | 18664   | 1.71      | 96  | 145.10 | 2374    | 0.22      | 165 | 235.25 | 319     | 0.03      |
| 28 | 77.05  | 159933  | 14.70     | 97  | 146.05 | 1764    | 0.16      | 166 | 236.25 | 838     | 0.08      |
| 29 | 78.05  | 51062   | 4.69      | 98  | 147.05 | 1009    | 0.09      | 167 | 237.20 | 388     | 0.04      |
| 30 | 79.05  | 70177   | 6.45      | 99  | 148.00 | 631     | 0.06      | 168 | 238.20 | 255     | 0.02      |
| 31 | 80.05  | 16860   | 1.55      | 100 | 149.00 | 385     | 0.04      | 169 | 239.30 | 546     | 0.05      |
| 32 | 81.05  | 9962    | 0.92      | 101 | 150.10 | 527     | 0.05      | 170 | 240.20 | 217     | 0.02      |
| 33 | 82.10  | 1934    | 0.18      | 102 | 151.05 | 583     | 0.05      | 171 | 241.20 | 594     | 0.05      |
| 34 | 83.10  | 3868    | 0.36      | 103 | 152.00 | 1183    | 0.11      | 172 | 242.20 | 258     | 0.02      |
| 35 | 84.05  | 3207    | 0.29      | 104 | 153.05 | 1318    | 0.12      | 173 | 243.25 | 319     | 0.03      |
| 36 | 85.10  | 3174    | 0.29      | 105 | 154.05 | 2062    | 0.19      | 174 | 244.20 | 1462    | 0.13      |
| 37 | 86.10  | 1415    | 0.13      | 106 | 155.05 | 1568    | 0.14      | 175 | 245.30 | 444     | 0.04      |
| 38 | 87.05  | 2226    | 0.20      | 107 | 156.05 | 4930    | 0.45      | 176 | 246.25 | 435     | 0.04      |
| 39 | 88.15  | 2736    | 0.25      | 108 | 157.00 | 2012    | 0.18      | 177 | 247.25 | 962     | 0.09      |
| 40 | 89.10  | 19423   | 1.78      | 109 | 158.05 | 2172    | 0.20      | 178 | 248.25 | 814     | 0.07      |
| 41 | 90.15  | 71749   | 6.59      | 110 | 159.05 | 1157    | 0.11      | 179 | 249.15 | 411     | 0.04      |
| 42 | 91.10  | 108829  | 100.00    | 111 | 160.00 | 542     | 0.05      | 180 | 250.15 | 989     | 0.09      |
| 43 | 92.10  | 91846   | 8.44      | 112 | 161.00 | 388     | 0.04      | 181 | 251.20 | 548     | 0.05      |
| 44 | 93.00  | 16750   | 1.54      | 113 | 162.00 | 466     | 0.04      | 182 | 252.25 | 500     | 0.05      |
| 45 | 94.05  | 4139    | 0.38      | 114 | 163.00 | 391     | 0.04      | 183 | 253.10 | 470     | 0.04      |
| 46 | 95.05  | 4899    | 0.45      | 115 | 163.95 | 512     | 0.05      | 184 | 254.20 | 462     | 0.04      |
| 47 | 96.10  | 1862    | 0.17      | 116 | 165.05 | 997     | 0.09      | 185 | 255.20 | 742     | 0.07      |
| 48 | 97.15  | 2742    | 0.25      | 117 | 166.00 | 2961    | 0.27      | 186 | 256.20 | 620     | 0.06      |
| 49 | 98.15  | 2858    | 0.26      | 118 | 167.05 | 4452    | 0.41      | 187 | 257.20 | 1009    | 0.09      |
| 50 | 99.10  | 1095    | 0.10      | 119 | 168.00 | 7623    | 0.70      | 188 | 258.20 | 1337    | 0.12      |
| 51 | 100.15 | 662     | 0.06      | 120 | 169.00 | 5490    | 0.50      | 189 | 259.20 | 721     | 0.07      |
| 52 | 101.15 | 1018    | 0.09      | 121 | 170.00 | 12964   | 1.19      | 190 | 260.15 | 755     | 0.07      |
| 53 | 102.15 | 2509    | 0.23      | 122 | 171.00 | 7519    | 0.69      | 191 | 261.15 | 517     | 0.05      |
| 54 | 103.15 | 5193    | 0.48      | 123 | 172.00 | 6023    | 0.55      | 192 | 262.10 | 1423    | 0.13      |
| 55 | 104.15 | 21665   | 1.99      | 124 | 172.95 | 1687    | 0.16      | 193 | 263.15 | 579     | 0.05      |
| 56 | 105.10 | 59895   | 5.50      | 125 | 174.00 | 924     | 0.08      | 194 | 264.10 | 2279    | 0.21      |
| 57 | 106.10 | 62922   | 5.78      | 126 | 175.00 | 489     | 0.04      | 195 | 265.15 | 1872    | 0.17      |
| 58 | 107.15 | 78472   | 7.21      | 127 | 176.00 | 415     | 0.04      | 196 | 266.10 | 4090    | 0.38      |
| 59 | 108.15 | 40703   | 3.74      | 128 | 177.00 | 286     | 0.03      | 197 | 267.10 | 1380    | 0.13      |
| 60 | 109.15 | 4299    | 0.40      | 129 | 178.00 | 298     | 0.03      | 198 | 268.10 | 6807    | 0.63      |
| 61 | 110.10 | 1364    | 0.13      | 130 | 179.00 | 385     | 0.04      | 199 | 269.05 | 1910    | 0.18      |
| 62 | 111.20 | 1438    | 0.13      | 131 | 179.95 | 813     | 0.07      | 200 | 270.10 | 1612    | 0.15      |
| 63 | 112.05 | 1219    | 0.11      | 132 | 181.05 | 1052    | 0.10      | 201 | 271.10 | 578     | 0.05      |
| 64 | 113.05 | 1459    | 0.13      | 133 | 182.00 | 1294    | 0.12      | 202 | 272.10 | 506     | 0.05      |
| 65 | 114.05 | 2413    | 0.22      | 134 | 183.00 | 1018    | 0.09      | 203 | 273.10 | 322     | 0.03      |
| 66 | 115.05 | 4121    | 0.38      | 135 | 184.00 | 1881    | 0.17      | 204 | 274.10 | 508     | 0.05      |
| 67 | 116.05 | 3428    | 0.31      | 136 | 184.95 | 1072    | 0.10      | 205 | 275.10 | 380     | 0.03      |
| 68 | 117.05 | 5925    | 0.54      | 137 | 185.95 | 837     | 0.08      | 206 | 276.10 | 1478    | 0.14      |
| 69 | 118.05 | 4438    | 0.41      | 138 | 187.00 | 492     | 0.05      | 207 | 277.10 | 1508    | 0.14      |
| 70 | 119.10 | 3518    | 0.32      | 139 | 188.00 | 319     | 0.03      | 208 | 278.10 | 3412    | 0.31      |
| 71 | 120.10 | 2058    | 0.19      | 140 | 189.00 | 215     | 0.02      | 209 | 279.10 | 1281    | 0.12      |
| 72 | 121.15 | 1299    | 0.12      | 141 | 193.00 | 297     | 0.03      | 210 | 280.10 | 6390    | 0.59      |
| 73 | 122.15 | 1090    | 0.10      | 142 | 193.90 | 562     | 0.05      | 211 | 281.05 | 1544    | 0.14      |
| 74 | 123.20 | 1366    | 0.13      | 143 | 194.90 | 591     | 0.05      | 212 | 282.10 | 2294    | 0.21      |
| 75 | 124.20 | 670     | 0.06      | 144 | 195.85 | 654     | 0.06      | 213 | 283.00 | 895     | 0.08      |
| 76 | 125.15 | 505     | 0.05      | 145 | 197.00 | 806     | 0.07      | 214 | 284.05 | 525     | 0.05      |
| 77 | 126.15 | 589     | 0.05      | 146 | 197.80 | 682     | 0.06      | 215 | 285.10 | 468     | 0.04      |
| 78 | 127.15 | 900     | 0.08      | 147 | 198.90 | 470     | 0.04      | 216 | 286.10 | 326     | 0.03      |

| #   | m/z    | Abs. In | Rel. Int. | #   | m/z    | Abs. In | Rel. Int. | #   | m/z    | Abs. In | Rel. Int. |
|-----|--------|---------|-----------|-----|--------|---------|-----------|-----|--------|---------|-----------|
| 217 | 287.10 | 225     | 0.02      | 276 | 347.10 | 270     | 0.02      | 335 | 406.10 | 714     | 0.07      |
| 218 | 288.10 | 388     | 0.04      | 277 | 348.15 | 6118    | 0.56      | 336 | 407.15 | 636     | 0.06      |
| 219 | 289.10 | 449     | 0.04      | 278 | 349.15 | 4932    | 0.45      | 337 | 408.15 | 1313    | 0.12      |
| 220 | 290.10 | 1342    | 0.12      | 279 | 350.15 | 33749   | 3.10      | 338 | 409.15 | 1261    | 0.12      |
| 221 | 291.15 | 720     | 0.07      | 280 | 351.15 | 26545   | 2.44      | 339 | 410.10 | 1718    | 0.16      |
| 222 | 292.10 | 9666    | 0.89      | 281 | 352.15 | 81401   | 7.48      | 340 | 411.15 | 1078    | 0.10      |
| 223 | 293.10 | 9772    | 0.90      | 282 | 353.25 | 18543   | 1.70      | 341 | 412.10 | 1542    | 0.14      |
| 224 | 294.10 | 25895   | 2.38      | 283 | 354.15 | 126433  | 11.62     | 342 | 413.20 | 1065    | 0.10      |
| 225 | 295.10 | 6433    | 0.59      | 284 | 355.10 | 25895   | 2.38      | 343 | 414.05 | 713     | 0.07      |
| 226 | 296.10 | 51970   | 4.78      | 285 | 356.15 | 25958   | 2.39      | 344 | 415.10 | 1226    | 0.11      |
| 227 | 297.05 | 10872   | 1.00      | 286 | 357.05 | 4841    | 0.44      | 345 | 416.10 | 516     | 0.05      |
| 228 | 298.10 | 10124   | 0.93      | 287 | 358.20 | 778     | 0.07      | 346 | 417.05 | 555     | 0.05      |
| 229 | 299.05 | 2325    | 0.21      | 288 | 359.40 | 463     | 0.04      | 347 | 418.10 | 388     | 0.04      |
| 230 | 300.05 | 482     | 0.04      | 289 | 360.40 | 434     | 0.04      | 348 | 419.10 | 386     | 0.04      |
| 231 | 301.00 | 255     | 0.02      | 290 | 361.25 | 390     | 0.04      | 349 | 420.10 | 298     | 0.03      |
| 232 | 302.00 | 404     | 0.04      | 291 | 362.15 | 527     | 0.05      | 350 | 421.05 | 338     | 0.03      |
| 233 | 302.95 | 478     | 0.04      | 292 | 363.40 | 454     | 0.04      | 351 | 422.00 | 438     | 0.04      |
| 234 | 304.25 | 1031    | 0.09      | 293 | 364.40 | 441     | 0.04      | 352 | 423.05 | 696     | 0.06      |
| 235 | 305.35 | 1173    | 0.11      | 294 | 365.35 | 958     | 0.09      | 353 | 424.00 | 836     | 0.08      |
| 236 | 306.25 | 8371    | 0.77      | 295 | 366.35 | 867     | 0.08      | 354 | 425.05 | 594     | 0.05      |
| 237 | 307.25 | 45850   | 4.21      | 296 | 367.40 | 1481    | 0.14      | 355 | 426.05 | 1043    | 0.10      |
| 238 | 308.25 | 27017   | 2.48      | 297 | 368.40 | 3076    | 0.28      | 356 | 427.05 | 578     | 0.05      |
| 239 | 309.15 | 7888    | 0.72      | 298 | 369.35 | 1845    | 0.17      | 357 | 428.00 | 674     | 0.06      |
| 240 | 310.10 | 39802   | 3.66      | 299 | 370.30 | 999     | 0.09      | 358 | 429.00 | 345     | 0.03      |
| 241 | 311.05 | 8289    | 0.76      | 300 | 371.20 | 794     | 0.07      | 359 | 430.10 | 598     | 0.05      |
| 242 | 312.10 | 8414    | 0.77      | 301 | 372.25 | 796     | 0.07      | 360 | 431.05 | 401     | 0.04      |
| 243 | 313.20 | 2913    | 0.27      | 302 | 373.25 | 649     | 0.06      | 361 | 432.00 | 599     | 0.06      |
| 244 | 314.15 | 773     | 0.07      | 303 | 374.20 | 500     | 0.05      | 362 | 432.95 | 390     | 0.04      |
| 245 | 315.15 | 373     | 0.03      | 304 | 375.25 | 533     | 0.05      | 363 | 434.10 | 383     | 0.04      |
| 246 | 315.90 | 276     | 0.03      | 305 | 376.20 | 764     | 0.07      | 364 | 435.10 | 258     | 0.02      |
| 247 | 316.85 | 386     | 0.04      | 306 | 377.20 | 614     | 0.06      | 365 | 436.75 | 321     | 0.03      |
| 248 | 317.90 | 399     | 0.04      | 307 | 378.20 | 868     | 0.08      | 366 | 437.70 | 484     | 0.04      |
| 249 | 319.05 | 578     | 0.05      | 308 | 379.25 | 1023    | 0.09      | 367 | 438.90 | 462     | 0.04      |
| 250 | 320.10 | 583     | 0.05      | 309 | 380.15 | 1408    | 0.13      | 368 | 439.80 | 366     | 0.03      |
| 251 | 321.10 | 777     | 0.07      | 310 | 381.20 | 1009    | 0.09      | 369 | 441.05 | 496     | 0.05      |
| 252 | 322.05 | 1112    | 0.10      | 311 | 382.25 | 1402    | 0.13      | 370 | 442.05 | 514     | 0.05      |
| 253 | 323.10 | 974     | 0.09      | 312 | 383.25 | 2090    | 0.19      | 371 | 443.05 | 902     | 0.08      |
| 254 | 324.10 | 1318    | 0.12      | 313 | 384.20 | 1946    | 0.18      | 372 | 444.05 | 407     | 0.04      |
| 255 | 325.15 | 1202    | 0.11      | 314 | 385.20 | 3260    | 0.30      | 373 | 445.20 | 1599    | 0.15      |
| 256 | 326.10 | 1844    | 0.17      | 315 | 386.20 | 2054    | 0.19      | 374 | 446.15 | 507     | 0.05      |
| 257 | 327.40 | 951     | 0.09      | 316 | 387.20 | 4902    | 0.45      | 375 | 447.70 | 430     | 0.04      |
| 258 | 328.35 | 480     | 0.04      | 317 | 388.20 | 2028    | 0.19      | 376 | 448.70 | 351     | 0.03      |
| 259 | 329.10 | 278     | 0.03      | 318 | 389.20 | 1498    | 0.14      | 377 | 449.70 | 510     | 0.05      |
| 260 | 330.05 | 339     | 0.03      | 319 | 390.25 | 876     | 0.08      | 378 | 450.50 | 255     | 0.02      |
| 261 | 331.15 | 781     | 0.07      | 320 | 391.20 | 641     | 0.06      | 379 | 451.50 | 777     | 0.07      |
| 262 | 332.15 | 990     | 0.09      | 321 | 392.20 | 452     | 0.04      | 380 | 452.70 | 409     | 0.04      |
| 263 | 333.15 | 2090    | 0.19      | 322 | 393.25 | 822     | 0.08      | 381 | 454.20 | 974     | 0.09      |
| 264 | 334.10 | 2071    | 0.19      | 323 | 394.15 | 865     | 0.08      | 382 | 455.25 | 365     | 0.03      |
| 265 | 335.15 | 3842    | 0.35      | 324 | 395.25 | 680     | 0.06      | 383 | 456.25 | 7785    | 0.72      |
| 266 | 336.15 | 3157    | 0.29      | 325 | 396.20 | 770     | 0.07      | 384 | 457.25 | 8651    | 0.79      |
| 267 | 337.10 | 4551    | 0.42      | 326 | 397.15 | 473     | 0.04      | 385 | 458.20 | 20503   | 1.88      |
| 268 | 338.10 | 1945    | 0.18      | 327 | 398.10 | 385     | 0.04      | 386 | 459.25 | 5902    | 0.54      |
| 269 | 339.25 | 1566    | 0.14      | 328 | 399.10 | 409     | 0.04      | 387 | 460.20 | 38226   | 3.51      |
| 270 | 340.45 | 782     | 0.07      | 329 | 400.10 | 380     | 0.03      | 388 | 461.25 | 10119   | 0.93      |
| 271 | 341.40 | 818     | 0.08      | 330 | 401.10 | 404     | 0.04      | 389 | 462.20 | 7446    | 0.68      |
| 272 | 342.35 | 561     | 0.05      | 331 | 402.10 | 418     | 0.04      | 390 | 463.25 | 1843    | 0.17      |
| 273 | 343.40 | 295     | 0.03      | 332 | 403.10 | 460     | 0.04      | 391 | 464.20 | 201     | 0.02      |
| 274 | 345.25 | 462     | 0.04      | 333 | 404.20 | 678     | 0.06      |     |        |         |           |
| 275 | 346.20 | 660     | 0.06      | 334 | 405.20 | 1041    | 0.10      |     |        |         |           |

Synthesis of *N*-(benzyloxy)-2-((4-((4-hydroxyphenyl)diazenyl)phenyl)selanyl)acetamide

(16)

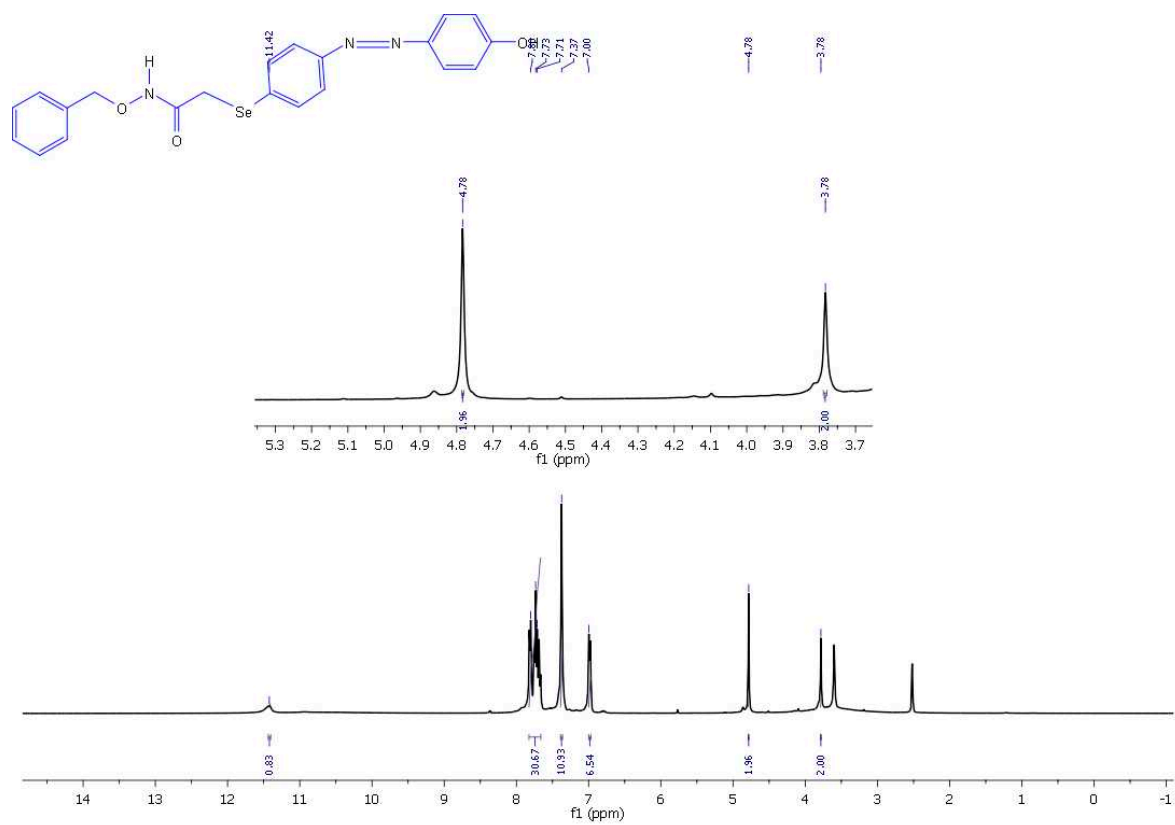

<sup>1</sup>H NMR chart of compound 16

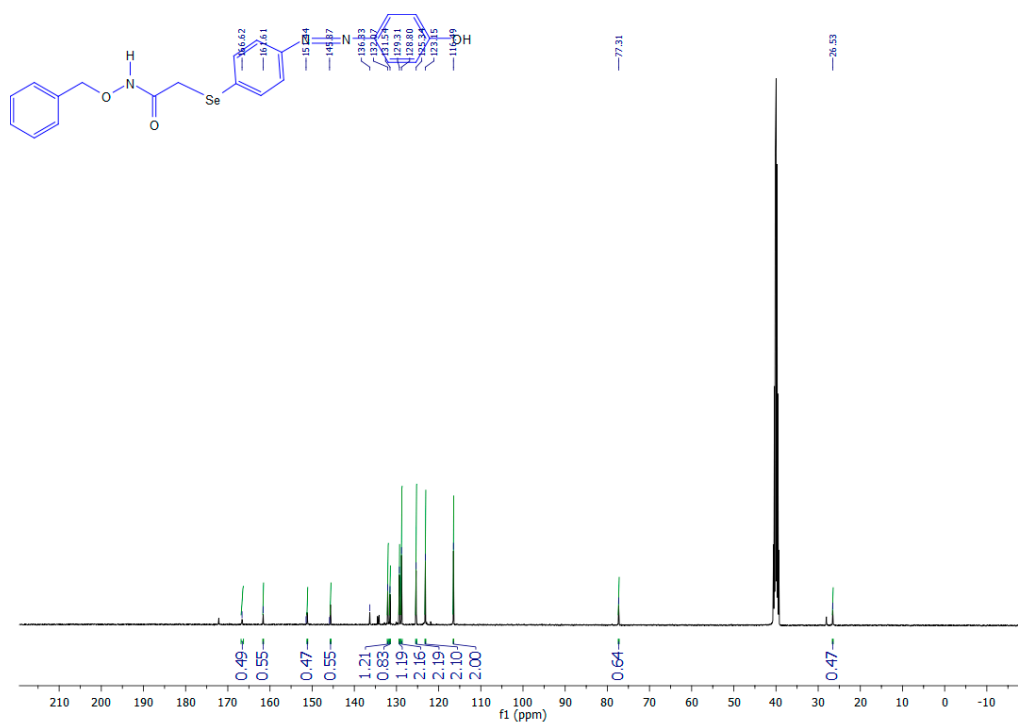

<sup>13</sup>CNMR chart of compound 16

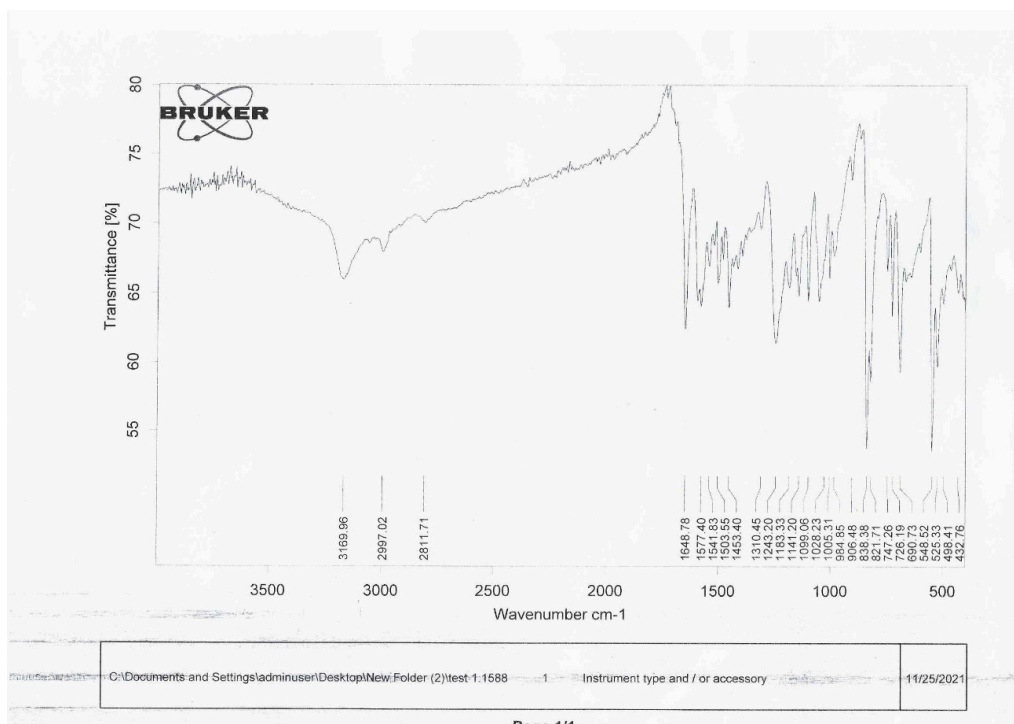

IR chart of compound 16

# **Cairo University Micro Analytical Center**

## **DI Analysis Shimadzu Qp-2010 Plus**

Sample Information  
 Analyzed by : Dr. Mai Younis  
 Analyzed : 03/01/2007 06:29:34  
 Sample Name : J14  
 Sample ID :  
 Customer Name : Dr. Mohamed Soliman - Science - Cairo  
 Data File : C:\GCMSolution\Data\Project\U14.QGD  
 Org Data File : C:\GCMSolution\Data\Project\U14.QGD  
 Method File : C:\GCMSolution\Data\Project\High Temperature Op  
 Org Method File : C:\GCMSolution\Data\Project\High Temperature Op  
 Report File :  
 Tuning File : C:\GCMSolution\System\Tune1\\_default.qgt  
 \$EndIf\$Modified by : Dr. Mai Younis  
 Modified : 03/01/2007 06:37:07

### Method

Analytical Line 1  
 IonSourceTemp :250.00 °C  
 [MS Table]  
 --Group 1 - Event 1--  
 Start Time :0.00min  
 End Time :10.00min  
 ACQ Mode :Scan  
 Event Time :0.50sec  
 Scan Speed :1000  
 Start m/z :50.00  
 End m/z :510.00

Electron Voltage :70 eV  
 Ionization Mode :EI

C:\GCMSolution\Data\Project\U14.QGD

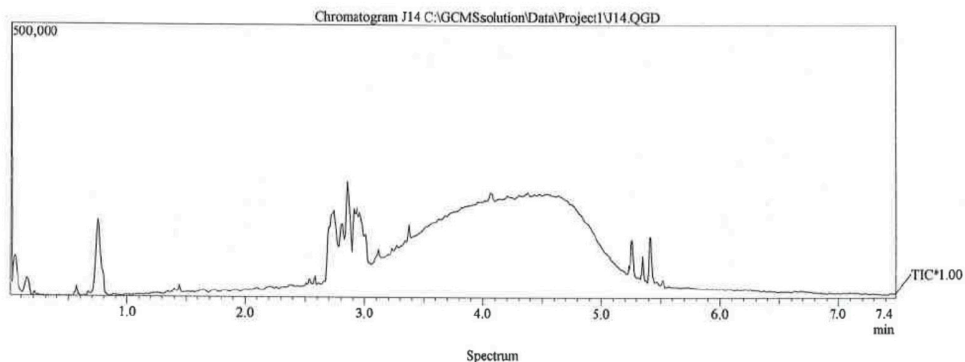

Line#:1 R.Time:4.7(Scan#:560)  
 MassPeaks:91  
 RawMode:Single 4.7(560) BasePeak:91(39273)  
 BG Mode:None Group 1 - Event 1

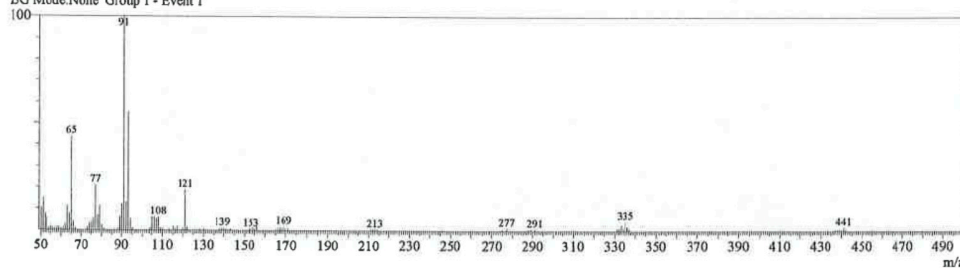

### Mass Table

Line#:1 R.Time:4.7(Scan#:560)

MassPeaks:91

RawMode:Single 4.7(560) BasePeak:91(39273)

BG Mode:None Group 1 - Event 1

| # | m/z   | Abs. In | Rel. Int. | # | m/z   | Abs. In | Rel. Int. | # | m/z   | Abs. In | Rel. Int. |
|---|-------|---------|-----------|---|-------|---------|-----------|---|-------|---------|-----------|
| 1 | 50.05 | 4010    | 10.21     | 4 | 53.05 | 2166    | 5.52      | 7 | 56.00 | 471     | 1.20      |
| 2 | 51.05 | 5861    | 14.92     | 5 | 54.00 | 393     | 1.00      | 8 | 57.00 | 305     | 0.78      |
| 3 | 52.05 | 2891    | 7.36      | 6 | 55.05 | 671     | 1.71      | 9 | 58.10 | 580     | 1.48      |

| #  | m/z    | Abs. In | Rel. Int. | #  | m/z    | Abs. In | Rel. Int. | #  | m/z    | Abs. In | Rel. Int. |
|----|--------|---------|-----------|----|--------|---------|-----------|----|--------|---------|-----------|
| 10 | 59.05  | 675     | 1.72      | 38 | 106.10 | 2369    | 6.03      | 66 | 168.05 | 462     | 1.18      |
| 11 | 60.10  | 278     | 0.71      | 39 | 107.10 | 2078    | 5.29      | 67 | 168.95 | 749     | 1.91      |
| 12 | 61.10  | 543     | 1.38      | 40 | 108.10 | 2433    | 6.20      | 68 | 170.00 | 300     | 0.76      |
| 13 | 62.10  | 1214    | 3.09      | 41 | 109.10 | 417     | 1.06      | 69 | 171.00 | 337     | 0.86      |
| 14 | 63.05  | 4420    | 11.25     | 42 | 110.10 | 362     | 0.92      | 70 | 211.00 | 234     | 0.60      |
| 15 | 64.15  | 2981    | 7.59      | 43 | 113.10 | 202     | 0.51      | 71 | 212.00 | 209     | 0.53      |
| 16 | 65.05  | 17265   | 43.96     | 44 | 115.05 | 745     | 1.90      | 72 | 213.00 | 244     | 0.62      |
| 17 | 66.05  | 1585    | 4.04      | 45 | 116.00 | 204     | 0.52      | 73 | 214.00 | 233     | 0.59      |
| 18 | 67.00  | 335     | 0.85      | 46 | 117.05 | 776     | 1.98      | 74 | 275.00 | 210     | 0.53      |
| 19 | 73.15  | 441     | 1.12      | 47 | 119.30 | 326     | 0.83      | 75 | 277.20 | 522     | 1.33      |
| 20 | 74.10  | 1262    | 3.21      | 48 | 120.15 | 461     | 1.17      | 76 | 288.20 | 215     | 0.55      |
| 21 | 75.10  | 1551    | 3.95      | 49 | 121.15 | 7432    | 18.92     | 77 | 289.20 | 278     | 0.71      |
| 22 | 76.15  | 2187    | 5.57      | 50 | 122.15 | 632     | 1.61      | 78 | 291.20 | 361     | 0.92      |
| 23 | 77.10  | 8223    | 20.94     | 51 | 128.10 | 284     | 0.72      | 79 | 331.15 | 461     | 1.17      |
| 24 | 78.15  | 2585    | 6.58      | 52 | 130.10 | 399     | 1.02      | 80 | 332.15 | 458     | 1.17      |
| 25 | 79.10  | 4329    | 11.02     | 53 | 138.10 | 308     | 0.78      | 81 | 333.15 | 1072    | 2.73      |
| 26 | 80.10  | 905     | 2.30      | 54 | 139.25 | 474     | 1.21      | 82 | 334.10 | 462     | 1.18      |
| 27 | 81.10  | 314     | 0.80      | 55 | 140.20 | 262     | 0.67      | 83 | 335.20 | 1775    | 4.52      |
| 28 | 88.15  | 284     | 0.72      | 56 | 141.20 | 305     | 0.78      | 84 | 336.15 | 756     | 1.92      |
| 29 | 89.15  | 2445    | 6.23      | 57 | 143.20 | 202     | 0.51      | 85 | 337.10 | 422     | 1.07      |
| 30 | 90.15  | 4810    | 12.25     | 58 | 152.20 | 311     | 0.79      | 86 | 437.10 | 218     | 0.56      |
| 31 | 91.10  | 39273   | 100.00    | 59 | 153.05 | 326     | 0.83      | 87 | 438.10 | 258     | 0.66      |
| 32 | 92.15  | 5294    | 13.48     | 60 | 154.10 | 561     | 1.43      | 88 | 439.10 | 297     | 0.76      |
| 33 | 93.10  | 21678   | 55.20     | 61 | 155.00 | 262     | 0.67      | 89 | 440.10 | 214     | 0.54      |
| 34 | 94.10  | 2052    | 5.22      | 62 | 156.05 | 994     | 2.53      | 90 | 441.20 | 713     | 1.82      |
| 35 | 95.10  | 414     | 1.05      | 63 | 165.00 | 249     | 0.63      | 91 | 442.20 | 238     | 0.61      |
| 36 | 104.15 | 434     | 1.11      | 64 | 166.00 | 322     | 0.82      |    |        |         |           |
| 37 | 105.10 | 2386    | 6.08      | 65 | 167.05 | 568     | 1.45      |    |        |         |           |

## References

1. El-Senduny, F.F.; Shabana, S.M.; Rösel, D.; Brabek, J.; Althagafi, I.; Angeloni, G.; Manolikakes, G.; Shaaban, S. Urea-functionalized organoselenium compounds as promising anti-HepG2 and apoptosis-inducing agents. *Future Medicinal Chemistry* **2021**, *13*, 1655-1677.
2. Shaaban, S.; Shabana, S.M.; Al-Faiyz, Y.S.; Manolikakes, G.; El-Senduny, F.F. Enhancing the chemosensitivity of HepG2 cells towards cisplatin by organoselenium pseudopeptides. *Bioorg Chem* **2021**, *109*, 104713, doi:10.1016/j.bioorg.2021.104713.
3. Shaaban, S.; Zarrouk, A.; Vervandier-Fasseur, D.; S.Al-Faiyz, Y.; El-Sawy, H.; Althagafi, I.; Andreoletti, P.; Cherkaoui-Malki, M. Cytoprotective organoselenium compounds for oligodendrocytes. *Arabian Journal of Chemistry* **2021**, *14*, doi:10.1016/j.arabjc.2021.103051.
4. Shaaban, S.; Negm, A.; Sobh, M.A.; Wessjohann, L.A. Expeditious Entry to Functionalized Pseudo-peptidic Organoselenide Redox Modulators via Sequential Ugi/SN Methodology. *Anticancer Agents Med Chem* **2016**, *16*, 621-632, doi:10.2174/1871520615666150916092035.
5. Shaaban, S.; Negm, A.; Ashmawy, A.M.; Ahmed, D.M.; Wessjohann, L.A. Combinatorial synthesis, in silico, molecular and biochemical studies of tetrazole-derived organic selenides with increased selectivity against hepatocellular carcinoma. **2016**, *122*, 55-71, doi:<https://doi.org/10.1016/j.ejmech.2016.06.005>.
6. Shaaban, S.; Ashmawy, A.M.; Negm, A.; Wessjohann, L.A. Synthesis and biochemical studies of novel organic selenides with increased selectivity for hepatocellular carcinoma and breast adenocarcinoma. *Eur J Med Chem* **2019**, *179*, 515-526, doi:10.1016/j.ejmech.2019.06.075.
